# Supplementary material for: Decreasing hospital burden of COVID-19 during the first wave in Regione Lombardia: an emergency measures context
Source: Springer Nature journal article supplement (doi:10.1186/s12889-021-11669-w), 2021-09-03
Supplement: MOESM1 [file 19630772]

# Appendix

## A.1 Data

### A.1.1 Demographic data of Regione Lombardia

| Age range | Number of inhabitants |
|-----------|-----------------------|
| 0-18      | 1,737,444             |
| 19-30     | 1,201,644             |
| 31-45     | 1,964,750             |
| 46-55     | 167,822               |
| 56-65     | 1,335,876             |
| 65+       | 2,186,031             |

*Table A.1: number of inhabitants per age group*

The ageing index (defined in Appendix A.4) increased from 145.5 in 2012 to 165.5 in 2019, while the old-age dependency index (defined in Appendix A.4) increased by 3.4% from 2012 to 2019 (1). The most common causes of death in the population are: oncological diseases, cerebrovascular diseases, cardiac ischemic diseases, other cardiac diseases, and circulatory system diseases (2).

The first 10 causes of death among males in Lombardia region: oncological diseases of upper and lower airways, cerebrovascular diseases, ischemic and non-ischemic cardiac diseases, other oncological diseases, acute myocardial

infarction, circulatory system diseases, chronic diseases of lower airways, oncological diseases of lower GI tract, oncological diseases of liver and intrahepatic ducts.

The first 10 causes of death among females in Lombardia region: cerebrovascular diseases, cardiac diseases, circulatory system diseases, cardiac ischemic diseases, oncological diseases of breasts, dementia, other oncological diseases, acute myocardial infarction, oncological disorders of upper and lower airways, Alzheimer's disease.

### **A.1.2 Emergency Measures**

Several pre-pandemic emergency measures were implemented, such as surveillance of in-bound flights from China(3); three laboratories being designated to carry out RT-PCR analysis of nasopharyngeal swabs; and identifying hospitals with at least one infectious diseases ward to admit suspected Covid-19 patients, requiring them and all hospitals in the region to assess their PPE stock (4). In addition, several Regional Units were created:

- a Regional task force (for management of the crisis);
- a Regional Unit of Coordination for Admission to ICU wards;
- a Regional Unit of Coordination for Hospital Admission (to acute wards), that was deputed to the management of available and staffed hospital beds in wards;
- a Regional Unit of Coordination for Hospital Discharge, that was in charge of managing patients discharged from hospitals and providing a recovery facility for further treatment or respiratory rehabilitation in a non-hospital setting. In order to increase consistency among the regional hospitals and for governance purposes, discharge criteria for hospitals to follow were distributed (5), as reported in Table A.2. Eligibility criteria for COVID-19 admission to the recovery facilities were provided (afebrile status for >3 days and improved respiratory symptoms). Integrated home care for patients that could not be transported to hospitals was set to be provided 24 hours per day, every day of the week;
- a Regional Unit of Coordination for Local Health Agencies.

| Covid Patients                                                                                              |                                                                                                                                                                                                           |                                                                                                                                                                                                                                                                                |                                                                                            |                                                                                                                                                         |
|-------------------------------------------------------------------------------------------------------------|-----------------------------------------------------------------------------------------------------------------------------------------------------------------------------------------------------------|--------------------------------------------------------------------------------------------------------------------------------------------------------------------------------------------------------------------------------------------------------------------------------|--------------------------------------------------------------------------------------------|---------------------------------------------------------------------------------------------------------------------------------------------------------|
| Coming from:                                                                                                | Discharge criteria                                                                                                                                                                                        | Exclusion Criteria                                                                                                                                                                                                                                                             | Going to:                                                                                  | Type of care:                                                                                                                                           |
| -Intensive Care Unit<br>-Subintensive Care Unit<br>-Infectious Disease Department<br>-Pneumology Department | -No fever for at least 3 days<br>-PaO <sub>2</sub> /FiO <sub>2</sub> > 250 w/o oxygen support<br>-PaO <sub>2</sub> /FiO <sub>2</sub> >300 with oxygen support<br>-NIV or CPAP weaned from at least 72 hrs | -CPAP and NIV ongoing therapy<br>-Continuous O <sub>2</sub> flux more than 10 L per minute but RF>20<br>-Dyspnea and VAS>4<br>-Hemodynamic alterations<br>-Severe arrhythmias<br>-Ongoing Fever<br>-Parenteral Nutrition<br>-Bilateral Lung infiltrates<br>-Multiorgan failure | -Subacute Care<br>-Respiratory Rehabilitation                                              | -Medical and nursing care 24 hrs<br>-Possibility of re-admission to hospital in case of exacerbation or relapse of the disease                          |
| -Internal Medicine Department                                                                               | -patients with comorbidities that have stable parameters<br>- no fever for at least 3 days<br>-Continuous O <sub>2</sub> flux less than 4 L per minute                                                    |                                                                                                                                                                                                                                                                                | -Socio-medical infrastructure<br>Appointed to Covid 19 patients reception as Nursing Homes | -Medical care available at night<br>-Nursing care 24 hrs<br>- Possibility of re-admission to hospital in case of exacerbation or relapse of the disease |

Table A.2: criteria for discharging Covid-19 patients from hospitals; DGR 2906

### A.1.3 Covid-19 Regional Database

The Prevention Unit (Prev) of the General Directorate of Welfare of Regione Lombardia is in charge of monitoring the trends of transmittable diseases in the region. As the SARS-CoV-2 pandemic was breaking out in Lombardia in February 2020, the Prev received Covid-19 related data from different sources, such as hospitals, laboratories and Local Healthcare Agencies, and created a single integrated id-hinged database. An individual who is suspected to have contracted Covid-19 due to onset of symptoms or an epidemiological link is reported by a healthcare worker in the “regional surveillance online monitor”. Each patient is identified through the regional registry office so that no overlap or mismatch might occur. If his oropharyngeal swab analyzed by RT-PCR yields a positive result, the

individual will be assigned an ID and he will enter the Covid-19 Database of Regione Lombardia. Eventual hospital admission will be recorded and matched to his ID as well as hospital discharge or death.

This Covid-19 Regional Database, as extracted on 5th August 2020, consists of 95,777 records, representing 95,354 individuals with confirmed COVID-19 disease covering the period 1st December 2019 to 17th July 2020. The dataset records age, gender, Local Healthcare Agency district of Lombardia, whether the individual has co-morbidities, whether the individual is a healthcare worker or care home resident, whether or not the individual had symptoms, whether or not the individual was hospitalised, and details of the admitting hospital if the individual is a patient. For each individual, dates of symptom onset, positive laboratory test, hospital admission, ICU admission, ICU discharge, hospital discharge, recovery and death are recorded.

Once duplicate records are excluded, 94,945 records remain, with one record per individual. Excluding patients with inconsistent or invalid hospital or ICU admission or discharge dates leaves 94,474 individuals. Restricting attention to patients who were hospitalised and have non-missing hospital admission dates leaves 46,609 individuals.

The dataset is relatively complete for most covariates of interest. Non-missing data on co-morbidities are used to define a co-morbidity flag: existence of at least one co-morbidity corresponds to a flag equal to 1; whereas missing information on co-morbidity corresponds to a flag equal to 0. The symptoms covariate is missing for the majority (64%) of patients, so is not considered further. District is missing for 5.7% of patients, but is not of primary interest in this analysis, so is also not considered further. Admitting hospital is missing for 12.4% of patients, but as hospital size - defined in terms of hospital bed capacity as small, medium or large, depending on numbers of both hospital and ICU beds (Table A.3) - is of interest, a complete-case analysis is considered, assuming the missingness is ignorable. All other covariates are complete, so after excluding the 12.4% of patients with missing hospital, 40,808 individuals are left in the dataset. Month of hospital admission is a key covariate of interest, to understand changes over time. However, very few hospital admissions occurred in January or July in the dataset, so patients admitted in these months are also excluded, leaving a final sample size of 40,550 individuals. Summaries of the covariates for these individuals are given in Table A.4.

|  |  |  |                           |
|--|--|--|---------------------------|
|  |  |  | <b>Number of ICU beds</b> |
|--|--|--|---------------------------|

|                         |        |            | Small  | Medium | Large  |
|-------------------------|--------|------------|--------|--------|--------|
|                         |        |            | [0,1]  | (1,6]  | (6,71] |
| Number of hospital beds | Small  | [0,88]     | Small  | Small  | Medium |
|                         |        |            | 52     | 1      | 0      |
|                         | Medium | (88,191]   | Small  | Medium | Large  |
|                         |        |            | 27     | 18     | 5      |
|                         | Large  | (191,1063] | Medium | Large  | Large  |
|                         |        |            | 5      | 18     | 27     |

Table A.3: Definition of hospital bed capacity. Both the total number of beds (rows) and the number of ICU beds (columns) are categorised into small, medium and large by quantiles over the number of hospitals of the respective numbers of beds (33% in each category for total hospital beds, 50% in the small category and 25% in the medium and large categories for ICU beds). These definitions for total and ICU beds are then combined into a single “hospital bed capacity” variable as shown in the table cells, resulting in 80 small hospitals, 23 medium hospitals and 50 large hospitals.

| Covariate          | Level    | Number | Proportion |
|--------------------|----------|--------|------------|
| Age group          | [0,45]   | 4,236  | 10.45%     |
|                    | (45,65]  | 13,010 | 32.08%     |
|                    | (65,Inf] | 23,304 | 57.47%     |
| Gender             | female   | 16,063 | 39.61%     |
|                    | male     | 24,487 | 60.39%     |
| Month of admission | Feb      | 1,606  | 3.96%      |
|                    | Mar      | 28,101 | 69.30%     |
|                    | Apr      | 8,813  | 21.73%     |
|                    | May      | 1,525  | 3.76%      |

|                                 |        |        |        |
|---------------------------------|--------|--------|--------|
|                                 | Jun    | 505    | 1.25%  |
| <b>At least 1 co-morbidity?</b> | no     | 14,787 | 36.47% |
|                                 | yes    | 25,763 | 63.53% |
| <b>Care home resident?</b>      | no     | 38,825 | 95.75% |
|                                 | yes    | 1,725  | 4.25%  |
| <b>Healthcare worker?</b>       | no     | 38,889 | 95.90% |
|                                 | yes    | 1,661  | 4.10%  |
| <b>Hospital bed capacity</b>    | Large  | 28,663 | 70.69% |
|                                 | Medium | 5,288  | 13.04% |
|                                 | Small  | 6,599  | 16.27% |

*Table A.4: Covariate summaries*

The observed progression of patients through hospital (i.e. raw numbers and proportions transitioning between states) are shown in Figure A.1. From the initial admitting ward, patients progress to either being discharged, being admitted to ICU, or dying. From an ICU ward, patients are either discharged to a post-ICU hospital stay, or die. From a post-ICU stay, patients are either discharged or die. Patients transitioning from either the starting admitting ward state (black box) or an intermediate (white box) state to the “end” node represent individuals with unknown next event (<1% from “ward” and “ICU”; 15% from “post-ICU”). It is unknown whether the missing outcome had not happened by the end-date of the data, 17th July, (“right-censoring”), or whether the final outcome had happened, but was not recorded (“missing data/loss to follow-up”).

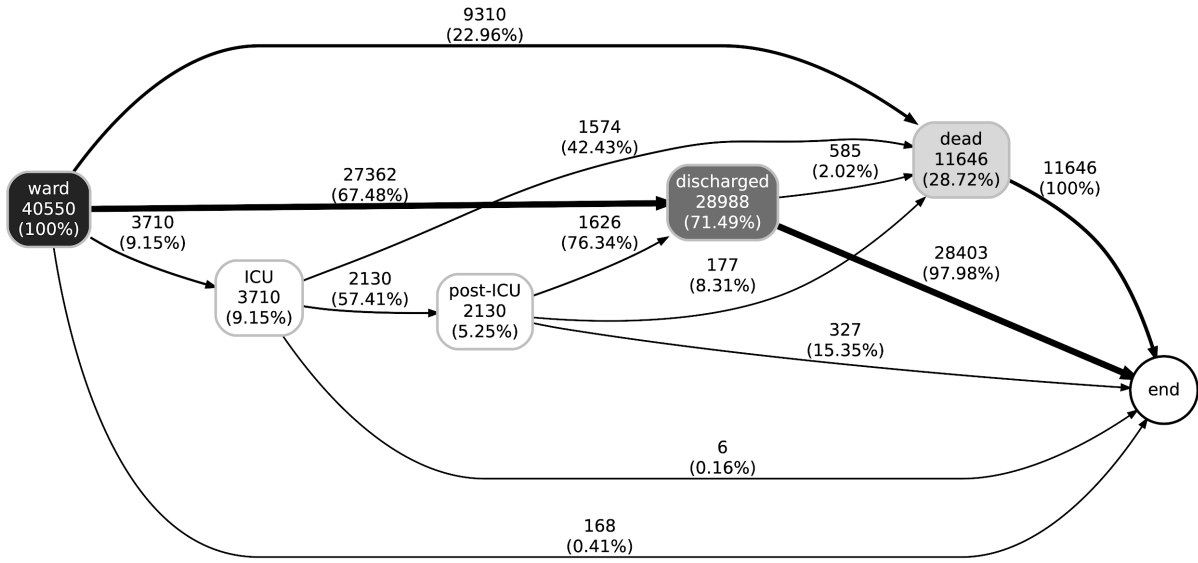

Figure A.1: Observed progression through hospital to final outcomes. Patients start in the hospital admission to a ward state (black box). The number (proportion) in each state (white and grey boxes) represents the total number (proportion) who reach each state, from any previous state: white boxes are the intermediate states of admittance to ICU and a post-ICU hospital stay; the grey boxes are the “absorbing” states representing the final outcomes of death or discharge. Numbers (proportions) along each arrow represent the number of patients transitioning from one state to the next.

## A.2 Mixture competing risks multi-state model

Jackson et al (7) extended the mixture competing risks framework of Larson & Dinse (11), which considered competing risks of transitions to next events from a single state, to a general multi-state model. Each individual  $i$  in state  $r$  makes a transition to a next event  $s$  at time  $t$  according to a transition intensity

$$\lambda_{i,r,s}(t) = \lambda^*_{i,r,s}(t) \text{ if } I_{i,r} = s, \text{ or } 0 \text{ otherwise}$$

where  $I_{i,r}$  is a latent categorical variable determining which event happens next. The next event is governed by probabilities  $\pi_{r,s} = P(I_{i,r} = s)$  where these probabilities sum to 1 over all next events  $s$  possible from starting state  $r$ . The transition intensity  $\lambda^*_{i,r,s}(t)$  is defined by the hazard function of a parametric distribution that governs the time  $T_{r,s}$  from entering state  $r$  until the next event  $s$ , conditional on the  $r$ - $s$  transition being the one that occurs.

We consider different parametric forms for the times  $T_{r,s} \sim f(T_{r,s})$ , choosing between gamma, Weibull, log-normal and generalised gamma distributions according to likelihood ratio tests (the gamma, Weibull and log-normal distributions are special cases of the generalised gamma distribution) minimum AIC.

When considering covariates, either binomial or multinomial logistic regression is used for the probabilities  $\pi_{r,s}$ , and the location (mean) parameter of the selected time-to-next-event distribution is regressed on the covariates. For the probabilities, covariate effects  $\beta$  correspond to odds ratios  $\exp(\beta)$  for each covariate level relative to their baseline. For the times, covariate effects  $\gamma$  correspond to “expected time ratios”  $\exp(\gamma)$  which act multiplicatively on the expected time from the current state to the next event.

The multi-state model describing in-hospital progression is displayed in Figure A.2.

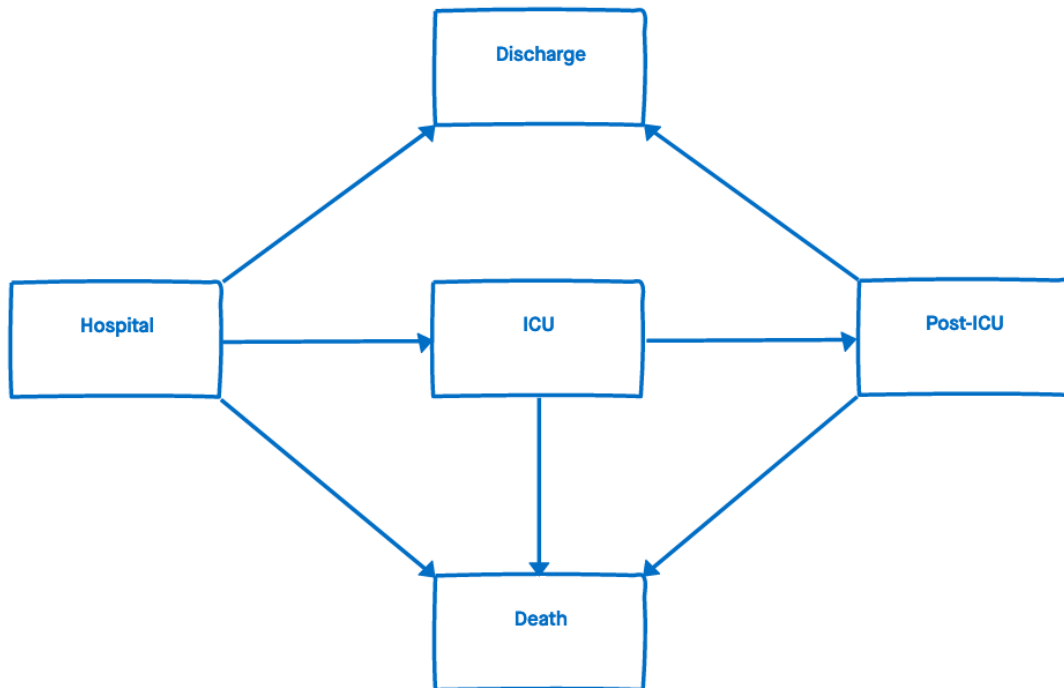

Figure A.2: Multi-state model



## A.3 Detailed results

### A.3.1 Model with no covariates

Parameter estimates from this model are given in Table A.5:

| From     | To        | Distribution | Parameter   | Estimate  |         | SE        |         |
|----------|-----------|--------------|-------------|-----------|---------|-----------|---------|
|          |           |              |             | Censoring | Missing | Censoring | Missing |
| Hospital | Discharge |              | $\pi_{1,2}$ | 0.6776    | 0.6776  | 0.0203    | 0.0203  |
| Hospital | ICU       |              | $\pi_{1,3}$ | 0.0918    | 0.0919  | 0.0174    | 0.0175  |
| Hospital | Death     |              | $\pi_{1,5}$ | 0.2306    | 0.2305  | 0.0119    | 0.0120  |
| Hospital | Discharge | gamma        | shape       | 0.7801    | 0.7794  | 0.0074    | 0.0074  |
| Hospital | Discharge | gamma        | rate        | 0.0452    | 0.0452  | 0.0101    | 0.0101  |
| Hospital | ICU       | gamma        | shape       | 0.7978    | 0.7968  | 0.0200    | 0.0200  |
| Hospital | ICU       | gamma        | rate        | 0.1422    | 0.1421  | 0.0272    | 0.0272  |
| Hospital | Death     | gamma        | shape       | 1.1015    | 1.1010  | 0.0130    | 0.0130  |
| Hospital | Death     | gamma        | rate        | 0.1159    | 0.1159  | 0.0163    | 0.0163  |
| ICU      | Post-ICU  |              | $\pi_{3,4}$ | 0.5751    | 0.5751  | 0.0332    | 0.0332  |
| ICU      | Death     |              | $\pi_{3,5}$ | 0.4249    | 0.4249  | 0.0332    | 0.0332  |
| ICU      | Post-ICU  | gamma        | shape       | 1.2785    | 1.2788  | 0.0275    | 0.0276  |
| ICU      | Post-ICU  | gamma        | rate        | 0.0765    | 0.0765  | 0.0336    | 0.0336  |
| ICU      | Death     | gamma        | shape       | 1.4917    | 1.4918  | 0.0324    | 0.0324  |
| ICU      | Death     | gamma        | rate        | 0.1220    | 0.1220  | 0.0384    | 0.0384  |
| Post-ICU | Discharge |              | $\pi_{4,2}$ | 0.9019    | 0.9018  | 0.0679    | 0.0791  |
| Post-ICU | Death     |              | $\pi_{4,5}$ | 0.0981    | 0.0982  | 0.0679    | 0.0791  |
| Post-ICU | Discharge | gamma        | shape       | 2.1014    | 2.0990  | 0.0325    | 0.0327  |
| Post-ICU | Discharge | gamma        | rate        | 0.0946    | 0.0945  | 0.0368    | 0.0369  |

|          |       |       |       |        |        |        |        |
|----------|-------|-------|-------|--------|--------|--------|--------|
| Post-ICU | Death | gamma | shape | 1.6067 | 1.5849 | 0.0953 | 0.0970 |
| Post-ICU | Death | gamma | rate  | 0.1281 | 0.1265 | 0.1127 | 0.1139 |

Table A.5: parameter estimates for the model with no covariates, by missing outcome assumption: (a) censoring at 1 day after last observed event; (b) ignoring missing outcomes.

Comparison of non-parametric and parametric cumulative incidence curves, under both the missing outcome assumptions, are shown in Figure A.3:

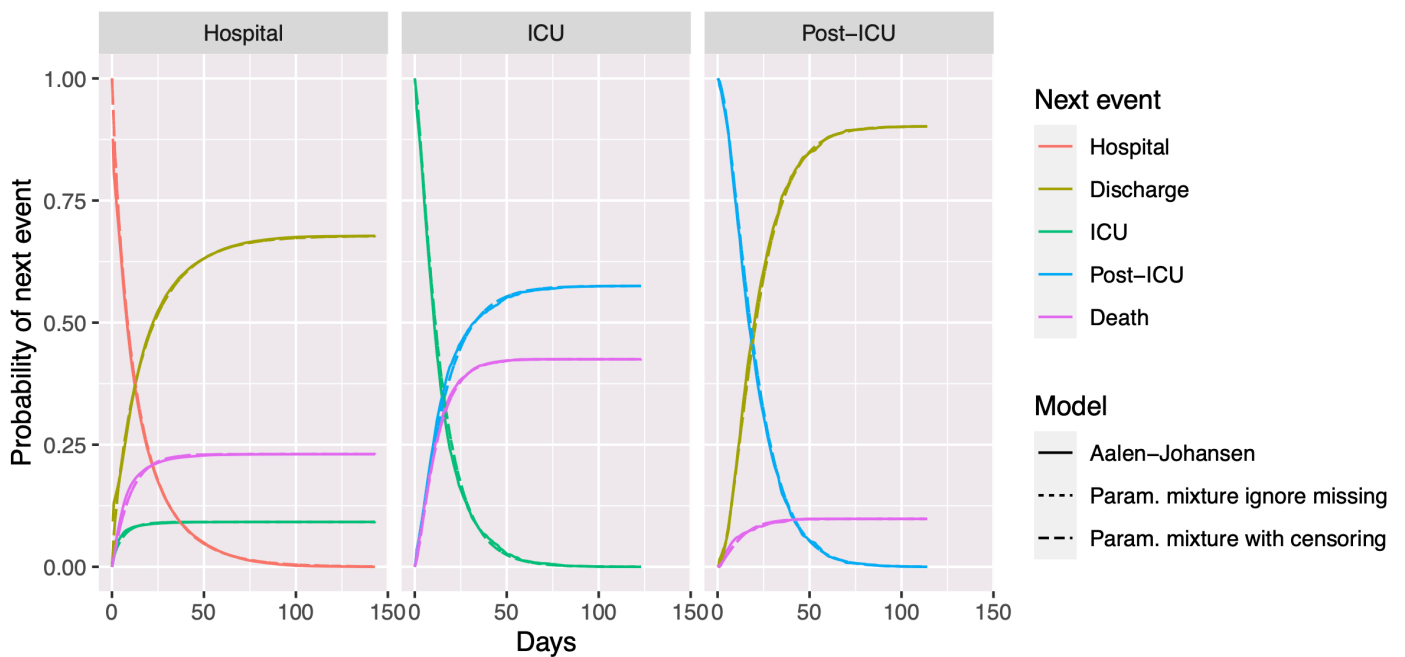

Figure A.3: Parametric versus non-parametric cumulative incidence estimates, by starting state (columns), next event (colours) and model (line type).

Estimated probabilities of next events are given in Table A.6:

|          |            | CENSORING      |       |       | MISSING        |       |       |
|----------|------------|----------------|-------|-------|----------------|-------|-------|
| From     | Next Event | Pr(Next Event) | Lower | Upper | Pr(Next Event) | Lower | Upper |
| Hospital | Discharge  | 0.678          | 0.673 | 0.681 | 0.678          | 0.674 | 0.681 |
|          | ICU        | 0.092          | 0.090 | 0.095 | 0.092          | 0.090 | 0.094 |

|          |           |       |       |       |       |       |       |
|----------|-----------|-------|-------|-------|-------|-------|-------|
|          | Death     | 0.231 | 0.227 | 0.235 | 0.231 | 0.227 | 0.235 |
| ICU      | Post-ICU  | 0.575 | 0.561 | 0.592 | 0.575 | 0.556 | 0.586 |
|          | Death     | 0.425 | 0.408 | 0.439 | 0.425 | 0.414 | 0.444 |
| Post-ICU | Discharge | 0.902 | 0.890 | 0.910 | 0.902 | 0.889 | 0.912 |
|          | Death     | 0.098 | 0.090 | 0.110 | 0.098 | 0.088 | 0.111 |

Table A.6: Estimated probabilities (95% confidence intervals) of next events, given current state, by missing outcome assumption: (a) censoring at 1 day after last observed event; (b) ignoring missing outcomes.

Estimated probabilities of final events are given in Table A.7:

| Final Event | CENSORING       |       |       | MISSING         |       |       |
|-------------|-----------------|-------|-------|-----------------|-------|-------|
|             | Pr(Final Event) | Lower | Upper | Pr(Final Event) | Lower | Upper |
| Death       | 0.275           | 0.271 | 0.280 | 0.275           | 0.271 | 0.278 |
| Discharge   | 0.725           | 0.720 | 0.729 | 0.725           | 0.722 | 0.729 |

Table A.7: Estimated probabilities (95% confidence intervals) of final events, given current state (hospital-fatality risks and complement), by missing outcome assumption: (a) censoring at 1 day after last observed event; (b) ignoring missing outcomes.

Estimated times to next events, under the censoring assumption only, are given in Table A.8:

| From     | Next Event | Mean | 95% CI of Mean |      | Median | 95% CI of Median |      | 25%-ile | 95% CI of 25%-ile |     | 75%-ile | 95% CI of 75%-ile |      |
|----------|------------|------|----------------|------|--------|------------------|------|---------|-------------------|-----|---------|-------------------|------|
| Hospital | Discharge  | 17.3 | 17.0           | 17.6 | 10.7   | 10.6             | 10.8 | 3.7     | 3.7               | 3.8 | 23.8    | 23.6              | 24.1 |
| Hospital | ICU        | 5.6  | 5.4            | 5.8  | 3.5    | 3.3              | 3.6  | 1.2     | 1.2               | 1.3 | 7.8     | 7.4               | 8.0  |
| Hospital | Death      | 9.5  | 9.2            | 9.6  | 6.8    | 6.7              | 7.0  | 3.0     | 2.9               | 3.1 | 13.2    | 13.0              | 13.4 |
| ICU      | Post-ICU   | 16.7 | 16.2           | 17.2 | 12.6   | 12.2             | 13.2 | 6.0     | 5.8               | 6.4 | 23.1    | 22.3              | 24.1 |
| ICU      | Death      | 12.2 | 11.8           | 12.6 | 9.6    | 9.3              | 10.1 | 4.9     | 4.7               | 5.2 | 16.8    | 16.1              | 17.4 |

|          |           |      |      |      |      |      |      |      |      |      |      |      |      |
|----------|-----------|------|------|------|------|------|------|------|------|------|------|------|------|
| Post-ICU | Discharge | 22.2 | 21.5 | 22.9 | 18.8 | 18.2 | 19.5 | 11.0 | 10.4 | 11.6 | 29.8 | 28.9 | 30.8 |
| Post-ICU | Death     | 12.5 | 10.8 | 13.7 | 10.1 | 8.9  | 11.9 | 5.3  | 4.5  | 6.6  | 17.1 | 15.1 | 19.5 |

Table A.8: Summaries of times from current state to next event, conditional on experiencing that next event, assuming missing outcomes are censoring at 1 day after last observed event.

Estimated times to final events (total length of stay in hospital), by pathway through hospital, are given in Table A.9, under the censoring assumption only:

| Outcome   | Pathway                         | Mean | 95% CI of Mean |                | Median | 95% CI of Median |                  | 25%-ile | 95% CI of 25%-ile |                   | 75%-ile | 95% CI of 75%-ile |                   |
|-----------|---------------------------------|------|----------------|----------------|--------|------------------|------------------|---------|-------------------|-------------------|---------|-------------------|-------------------|
|           |                                 |      | 95% CI of Mean | 95% CI of Mean |        | 95% CI of Median | 95% CI of Median |         | 95% CI of 25%-ile | 95% CI of 25%-ile |         | 95% CI of 75%-ile | 95% CI of 75%-ile |
| Death     | Hospital-Death                  | 9.5  | 9.3            | 9.6            | 6.9    | 6.6              | 7.1              | 3.0     | 2.9               | 3.1               | 13.2    | 12.8              | 13.5              |
| Death     | Hospital-ICU-Death              | 17.8 | 17.4           | 18.4           | 15.1   | 14.8             | 15.9             | 9.1     | 8.7               | 9.6               | 23.7    | 23.1              | 24.5              |
| Death     | Hospital-ICU-Post-ICU-Death     | 34.9 | 33.7           | 36.4           | 31.7   | 30.0             | 33.0             | 21.2    | 20.0              | 22.5              | 44.6    | 42.8              | 47.1              |
| Discharge | Hospital-Discharge              | 17.3 | 17.1           | 17.5           | 10.8   | 10.3             | 10.9             | 3.7     | 3.5               | 3.9               | 23.9    | 23.1              | 24.6              |
| Discharge | Hospital-ICU-Post-ICU-Discharge | 44.6 | 43.7           | 45.4           | 40.7   | 40.1             | 41.8             | 28.1    | 28.0              | 29.0              | 56.5    | 55.8              | 58.3              |
| Death     | Averaged over pathways          | 11.2 | 11.0           | 11.4           | 8.1    | 7.8              | 8.5              | 3.6     | 3.4               | 3.7               | 15.2    | 15.0              | 16.0              |
| Discharge | Averaged over pathways          | 19.1 | 18.8           | 19.3           | 11.8   | 11.6             | 12.3             | 4.0     | 3.9               | 4.3               | 27.1    | 26.0              | 27.8              |

Table A.9: Summaries of times from hospital admission to final events (total length of stay), by pathway through hospital, conditional on experiencing that final event, assuming missing outcomes are censoring at 1 day after last observed event.

Estimated lengths of stay in hospital, ICU and post-ICU, averaged over pathways and final outcomes, are given in Table A.10, under the censoring assumption only:

|  | Mean | 95% CI of Mean | Median | 95% CI of Median | 25%-ile | 95% CI of 25%-ile | 75%-ile | 95% CI of 75%-ile |
|--|------|----------------|--------|------------------|---------|-------------------|---------|-------------------|
|--|------|----------------|--------|------------------|---------|-------------------|---------|-------------------|

|          |      |      |      |      |      |      |      |     |      |      |      |      |
|----------|------|------|------|------|------|------|------|-----|------|------|------|------|
| Hospital | 16.9 | 16.7 | 17.0 | 10.4 | 10.1 | 10.9 | 3.8  | 3.8 | 4.1  | 22.6 | 22.5 | 23.8 |
| ICU      | 14.8 | 14.3 | 15.1 | 11.0 | 10.7 | 11.6 | 5.6  | 5.2 | 5.7  | 19.7 | 19.5 | 20.9 |
| Post-ICU | 21.3 | 20.6 | 21.8 | 18.0 | 17.1 | 18.7 | 10.1 | 9.6 | 10.5 | 28.8 | 27.5 | 30.1 |

Table A.10: Summaries of lengths of stay in hospital (total time in hospital), ICU and post-ICU wards, averaged over pathways and final outcomes, assuming missing outcomes are censoring at 1 day after last observed event.

### A.3.2 Model regressed on month of admission

Parameter estimates from this model are given in Table A.11:

| From     | To        | Distribution | Parameter       | Estimate |         | SE     |         | OR or ETR |         | Lower  |         | Upper  |         |
|----------|-----------|--------------|-----------------|----------|---------|--------|---------|-----------|---------|--------|---------|--------|---------|
|          |           |              |                 | Censor   | Missing | Censor | Missing | Censor    | Missing | Censor | Missing | Censor | Missing |
| Hospital | Discharge |              | $\pi_{1,2}$     | 0.6487   | 0.6486  | 0.0232 | 0.0232  |           |         |        |         |        |         |
| Hospital | ICU       |              | $\pi_{1,3}$     | 0.1045   | 0.1045  | 0.0199 | 0.0199  |           |         |        |         |        |         |
| Hospital | Death     |              | $\pi_{1,5}$     | 0.2469   | 0.2469  | 0.0141 | 0.0141  |           |         |        |         |        |         |
| Hospital | Discharge |              | $\pi_{1,2}$ Feb | 0.3890   | 0.3929  | 0.0761 | 0.0761  | 1.4755    | 1.4813  | 1.2711 | 1.2761  | 1.7127 | 1.7195  |
| Hospital | Discharge |              | $\pi_{1,2}$ Apr | -0.7601  | -0.7589 | 0.0505 | 0.0508  | 0.4676    | 0.4682  | 0.4235 | 0.4238  | 0.5163 | 0.5172  |
| Hospital | Discharge |              | $\pi_{1,2}$ May | -1.4800  | -1.4805 | 0.1497 | 0.1513  | 0.2276    | 0.2275  | 0.1697 | 0.1691  | 0.3053 | 0.3060  |
| Hospital | Discharge |              | $\pi_{1,2}$ Jun | -1.7210  | -1.7226 | 0.2680 | 0.2938  | 0.1789    | 0.1786  | 0.1058 | 0.1004  | 0.3025 | 0.3177  |
| Hospital | ICU       |              | $\pi_{1,3}$ Feb | 0.1182   | 0.1183  | 0.0604 | 0.0606  | 1.1255    | 1.1256  | 0.9998 | 0.9997  | 1.2670 | 1.2675  |
| Hospital | ICU       |              | $\pi_{1,3}$ Apr | -0.3578  | -0.3575 | 0.0303 | 0.0305  | 0.6992    | 0.6994  | 0.6589 | 0.6589  | 0.7420 | 0.7425  |
| Hospital | ICU       |              | $\pi_{1,3}$ May | -0.8463  | -0.8438 | 0.0758 | 0.0764  | 0.4290    | 0.4301  | 0.3698 | 0.3703  | 0.4977 | 0.4995  |
| Hospital | ICU       |              | $\pi_{1,3}$ Jun | -1.6530  | -1.6620 | 0.1717 | 0.1894  | 0.1915    | 0.1897  | 0.1368 | 0.1309  | 0.2681 | 0.2751  |

|          |           |          |                    |         |         |        |        |        |        |        |        |        |        |
|----------|-----------|----------|--------------------|---------|---------|--------|--------|--------|--------|--------|--------|--------|--------|
| Hospital | Discharge | gengamma | $\mu_{1,2}$        | 2.9678  | 2.9679  | 0.0134 | 0.0134 |        |        |        |        |        |        |
| Hospital | Discharge | gengamma | $\sigma_{1,2}$     | 1.0468  | 1.0472  | 0.0072 | 0.0072 |        |        |        |        |        |        |
| Hospital | Discharge | gengamma | $Q_{1,2}$          | 1.3271  | 1.3284  | 0.0197 | 0.0198 |        |        |        |        |        |        |
| Hospital | Discharge | gengamma | $T_{1,2}$ Feb      | 0.6777  | 0.6773  | 0.0347 | 0.0347 | 1.9694 | 1.9686 | 1.8399 | 1.8392 | 2.1079 | 2.1071 |
| Hospital | Discharge | gengamma | $T_{1,2}$ Apr      | -0.0425 | -0.0426 | 0.0151 | 0.0151 | 0.9584 | 0.9583 | 0.9304 | 0.9304 | 0.9872 | 0.9871 |
| Hospital | Discharge | gengamma | $T_{1,2}$ May      | -0.3932 | -0.3934 | 0.0305 | 0.0305 | 0.6749 | 0.6748 | 0.6356 | 0.6356 | 0.7165 | 0.7163 |
| Hospital | Discharge | gengamma | $T_{1,2}$ Jun      | -0.8019 | -0.8058 | 0.0518 | 0.0518 | 0.4485 | 0.4467 | 0.4052 | 0.4036 | 0.4963 | 0.4945 |
| Hospital | ICU       | gengamma | $\mu_{1,3}$        | 0.8490  | 0.8496  | 0.0439 | 0.0432 |        |        |        |        |        |        |
| Hospital | ICU       | gengamma | $\sigma_{1,3}$     | 1.2354  | 1.2359  | 0.0125 | 0.0125 |        |        |        |        |        |        |
| Hospital | ICU       | gengamma | $Q_{1,3}$          | -0.2507 | -0.2492 | 0.0600 | 0.0588 |        |        |        |        |        |        |
| Hospital | ICU       | gengamma | $T_{1,3}$ Feb      | 0.0940  | 0.0935  | 0.0851 | 0.0851 | 1.0985 | 1.0981 | 0.9298 | 0.9294 | 1.2979 | 1.2973 |
| Hospital | ICU       | gengamma | $T_{1,3}$ Apr      | -0.1716 | -0.1710 | 0.0604 | 0.0603 | 0.8423 | 0.8428 | 0.7483 | 0.7488 | 0.9482 | 0.9486 |
| Hospital | ICU       | gengamma | $T_{1,3}$ May      | -0.4879 | -0.4938 | 0.1833 | 0.1824 | 0.6139 | 0.6103 | 0.4286 | 0.4269 | 0.8794 | 0.8725 |
| Hospital | ICU       | gengamma | $T_{1,3}$ Jun      | -0.9796 | -1.0859 | 0.3486 | 0.3481 | 0.3755 | 0.3376 | 0.1896 | 0.1707 | 0.7436 | 0.6679 |
| Hospital | Death     | gengamma | $\mu_{1,5}$        | 1.8330  | 1.8330  | 0.0183 | 0.0183 |        |        |        |        |        |        |
| Hospital | Death     | gengamma | $\sigma_{1,5}$     | 1.0108  | 1.0108  | 0.0079 | 0.0079 |        |        |        |        |        |        |
| Hospital | Death     | gengamma | $Q_{1,5}$          | 0.3674  | 0.3681  | 0.0271 | 0.0271 |        |        |        |        |        |        |
| Hospital | Death     | gengamma | $T_{1,5}$ Feb      | 1.1846  | 1.1863  | 0.0514 | 0.0513 | 3.2695 | 3.2751 | 2.9564 | 2.9616 | 3.6157 | 3.6217 |
| Hospital | Death     | gengamma | $T_{1,5}$ Apr      | 0.1861  | 0.1865  | 0.0272 | 0.0272 | 1.2045 | 1.2051 | 1.1419 | 1.1425 | 1.2705 | 1.2710 |
| Hospital | Death     | gengamma | $T_{1,5}$ May      | 0.1478  | 0.1488  | 0.0716 | 0.0716 | 1.1593 | 1.1604 | 1.0075 | 1.0084 | 1.3340 | 1.3353 |
| Hospital | Death     | gengamma | $T_{1,5}$ Jun      | -0.2632 | -0.2797 | 0.1832 | 0.1867 | 0.7686 | 0.7560 | 0.5367 | 0.5243 | 1.1007 | 1.0900 |
| ICU      | Post-ICU  |          | $\pi_{3,4}$        | 0.5586  | 0.5582  | 0.0371 | 0.0372 |        |        |        |        |        |        |
| ICU      | Death     |          | $\pi_{3,5}$        | 0.4414  | 0.4418  | 0.0371 | 0.0372 |        |        |        |        |        |        |
| ICU      | Post-ICU  |          | $\pi_{3,4}$ Feb    | 0.0745  | 0.0676  | 0.1375 | 0.1377 | 1.0773 | 1.0699 | 0.8228 | 0.8168 | 1.4107 | 1.4015 |
| ICU      | Post-ICU  |          | $\pi_{3,4}$ Apr    | -0.4760 | -0.4839 | 0.1024 | 0.1034 | 0.6213 | 0.6164 | 0.5083 | 0.5033 | 0.7594 | 0.7548 |
| ICU      | Post-ICU  |          | $\pi_{3,4}$ MayJun | -0.8046 | -0.8192 | 0.3009 | 0.3022 | 0.4473 | 0.4408 | 0.2480 | 0.2438 | 0.8067 | 0.7969 |

|          |           |          |                    |         |         |        |        |        |        |        |        |        |        |
|----------|-----------|----------|--------------------|---------|---------|--------|--------|--------|--------|--------|--------|--------|--------|
| ICU      | Post-ICU  | gengamma | $\mu_{3,4}$        | 2.7774  | 2.7775  | 0.0339 | 0.0339 |        |        |        |        |        |        |
| ICU      | Post-ICU  | gengamma | $\sigma_{3,4}$     | 0.9166  | 0.9166  | 0.0185 | 0.0185 |        |        |        |        |        |        |
| ICU      | Post-ICU  | gengamma | $Q_{3,4}$          | 0.7055  | 0.7057  | 0.0537 | 0.0537 |        |        |        |        |        |        |
| ICU      | Post-ICU  | gengamma | $T_{3,4}$ Feb      | -0.2137 | -0.2137 | 0.0853 | 0.0857 | 0.8076 | 0.8076 | 0.6832 | 0.6828 | 0.9546 | 0.9553 |
| ICU      | Post-ICU  | gengamma | $T_{3,4}$ Apr      | -0.1802 | -0.1802 | 0.0553 | 0.0553 | 0.8351 | 0.8351 | 0.7493 | 0.7493 | 0.9308 | 0.9307 |
| ICU      | Post-ICU  | gengamma | $T_{3,4}$ MayJun   | -0.5303 | -0.5303 | 0.1182 | 0.1200 | 0.5884 | 0.5884 | 0.4668 | 0.4651 | 0.7417 | 0.7444 |
| ICU      | Death     | gengamma | $\mu_{3,5}$        | 2.4975  | 2.4975  | 0.0353 | 0.0353 |        |        |        |        |        |        |
| ICU      | Death     | gengamma | $\sigma_{3,5}$     | 0.8077  | 0.8077  | 0.0227 | 0.0227 |        |        |        |        |        |        |
| ICU      | Death     | gengamma | $Q_{3,5}$          | 0.8434  | 0.8436  | 0.0631 | 0.0632 |        |        |        |        |        |        |
| ICU      | Death     | gengamma | $T_{3,5}$ Feb      | 0.1253  | 0.1253  | 0.0819 | 0.0819 | 1.1334 | 1.1335 | 0.9654 | 0.9655 | 1.3308 | 1.3307 |
| ICU      | Death     | gengamma | $T_{3,5}$ Apr      | 0.1524  | 0.1524  | 0.0677 | 0.0677 | 1.1646 | 1.1646 | 1.0198 | 1.0199 | 1.3300 | 1.3297 |
| ICU      | Death     | gengamma | $T_{3,5}$ MayJun   | -0.9603 | -0.9597 | 0.2091 | 0.2088 | 0.3828 | 0.3830 | 0.2541 | 0.2544 | 0.5767 | 0.5767 |
| Post-ICU | Discharge |          | $\pi_{4,2}$        | 0.9158  | 0.9158  | 0.0831 | 0.0966 |        |        |        |        |        |        |
| Post-ICU | Death     |          | $\pi_{4,5}$        | 0.0842  | 0.0842  | 0.0831 | 0.0966 |        |        |        |        |        |        |
| Post-ICU | Discharge |          | $\pi_{4,2}$ Feb    | 1.5685  | 1.5686  | 0.1957 | 0.2395 | 4.7996 | 4.8002 | 3.2708 | 3.0017 | 7.0429 | 7.6761 |
| Post-ICU | Discharge |          | $\pi_{4,2}$ Apr    | 0.0567  | 0.0568  | 0.2000 | 0.2307 | 1.0583 | 1.0584 | 0.7152 | 0.6734 | 1.5662 | 1.6635 |
| Post-ICU | Discharge |          | $\pi_{4,2}$ MayJun | 0.6623  | 0.6642  | 0.3922 | 0.4950 | 1.9392 | 1.9429 | 0.8990 | 0.7364 | 4.1830 | 5.1266 |
| Post-ICU | Discharge | gengamma | $\mu_{4,2}$        | 3.1393  | 3.1403  | 0.0277 | 0.0277 |        |        |        |        |        |        |
| Post-ICU | Discharge | gengamma | $\sigma_{4,2}$     | 0.6809  | 0.6810  | 0.0206 | 0.0206 |        |        |        |        |        |        |
| Post-ICU | Discharge | gengamma | $Q_{4,2}$          | 0.7143  | 0.7180  | 0.0563 | 0.0566 |        |        |        |        |        |        |
| Post-ICU | Discharge | gengamma | $T_{4,2}$ Feb      | 0.0185  | 0.0186  | 0.0847 | 0.0849 | 1.0186 | 1.0188 | 0.8627 | 0.8627 | 1.2027 | 1.2032 |
| Post-ICU | Discharge | gengamma | $T_{4,2}$ Apr      | -0.1410 | -0.1411 | 0.0465 | 0.0465 | 0.8684 | 0.8684 | 0.7927 | 0.7927 | 0.9514 | 0.9513 |
| Post-ICU | Discharge | gengamma | $T_{4,2}$ MayJun   | -0.5581 | -0.5587 | 0.1297 | 0.1299 | 0.5723 | 0.5720 | 0.4438 | 0.4434 | 0.7379 | 0.7378 |
| Post-ICU | Death     | gengamma | $\mu_{4,5}$        | 2.1023  | 2.1032  | 0.1460 | 0.1473 |        |        |        |        |        |        |
| Post-ICU | Death     | gengamma | $\sigma_{4,5}$     | 0.8267  | 0.8269  | 0.0569 | 0.0570 |        |        |        |        |        |        |
| Post-ICU | Death     | gengamma | $Q_{4,5}$          | -0.2461 | -0.2443 | 0.2665 | 0.2696 |        |        |        |        |        |        |

|          |       |          |                  |         |         |        |        |        |        |        |        |        |        |
|----------|-------|----------|------------------|---------|---------|--------|--------|--------|--------|--------|--------|--------|--------|
| Post-ICU | Death | gengamma | $T_{4,5}$ Feb    | -0.1557 | -0.1561 | 0.1728 | 0.1728 | 0.8558 | 0.8555 | 0.6100 | 0.6098 | 1.2008 | 1.2002 |
| Post-ICU | Death | gengamma | $T_{4,5}$ Apr    | 0.0548  | 0.0545  | 0.1852 | 0.1854 | 1.0563 | 1.0560 | 0.7348 | 0.7343 | 1.5185 | 1.5186 |
| Post-ICU | Death | gengamma | $T_{4,5}$ MayJun | -0.1854 | -0.1863 | 0.3842 | 0.3863 | 0.8307 | 0.8301 | 0.3912 | 0.3893 | 1.7639 | 1.7699 |

Table A.11: parameter estimates for the model regressed on month of admission, by missing outcome assumption: (a) censoring at 1 day after last observed event; (b) ignoring missing outcomes. OR refers to odds ratios for the probabilities of each transition in each month relative to March. ETR refers to the expected time ratios for the times of each transition in each month relative to March.

Comparison of non-parametric and parametric cumulative incidence curves, under both the missing outcome assumptions, are shown in Figure A.4:

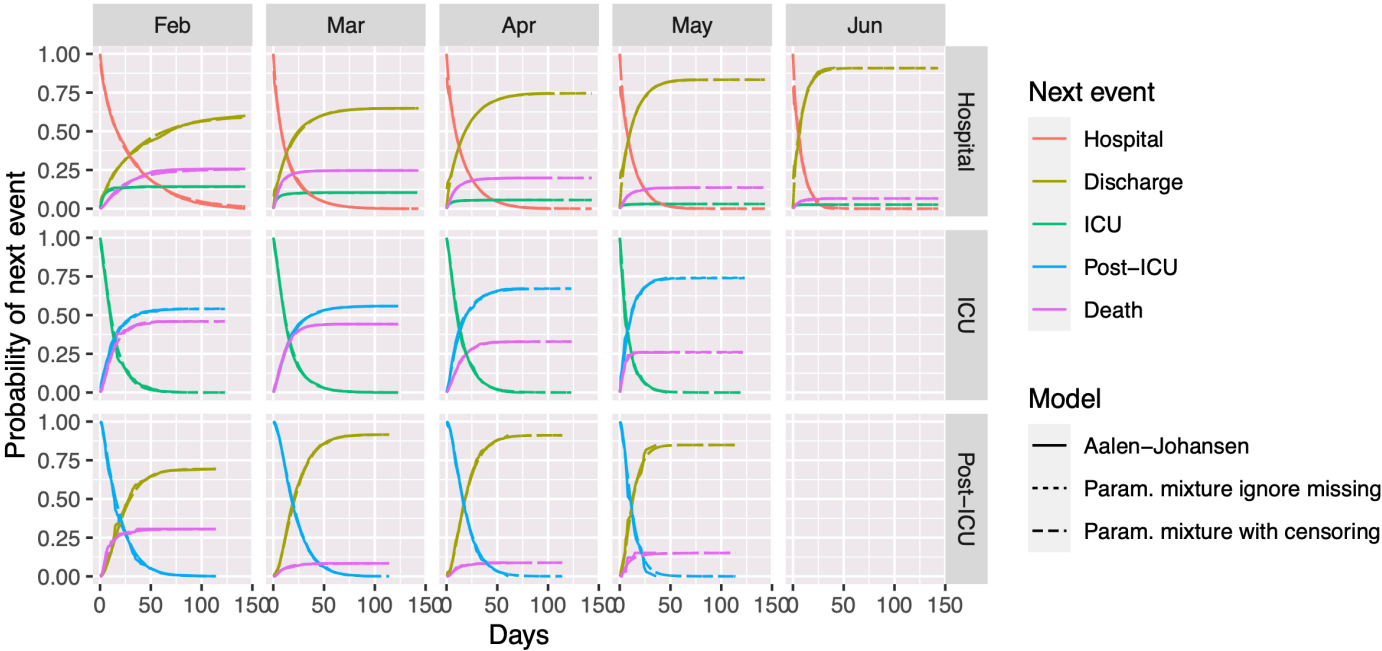

Figure A.4: Parametric versus non-parametric cumulative incidence estimates, by starting state (rows), next event (colours), month of admission (columns) and model (line type). Note that for the ICU and post-ICU states, due to small sample sizes, May and June are combined and shown in the May column.

Estimated probabilities of next events are given in Table A.12:

|  |  |  |  |                  |                |
|--|--|--|--|------------------|----------------|
|  |  |  |  | <b>CENSORING</b> | <b>MISSING</b> |
|--|--|--|--|------------------|----------------|



| From     | Next Event | Month  | Pr(Next Event) | Lower | Upper | Pr(Next Event) | Lower | Upper |
|----------|------------|--------|----------------|-------|-------|----------------|-------|-------|
| Hospital | Discharge  | Feb    | 0.600          | 0.580 | 0.620 | 0.600          | 0.582 | 0.623 |
| Hospital | Discharge  | Mar    | 0.649          | 0.644 | 0.655 | 0.649          | 0.643 | 0.654 |
| Hospital | Discharge  | Apr    | 0.745          | 0.734 | 0.754 | 0.745          | 0.736 | 0.754 |
| Hospital | Discharge  | May    | 0.833          | 0.809 | 0.850 | 0.833          | 0.816 | 0.846 |
| Hospital | Discharge  | Jun    | 0.908          | 0.894 | 0.929 | 0.908          | 0.886 | 0.927 |
| Hospital | ICU        | Feb    | 0.143          | 0.130 | 0.160 | 0.143          | 0.128 | 0.157 |
| Hospital | ICU        | Mar    | 0.104          | 0.100 | 0.107 | 0.105          | 0.101 | 0.108 |
| Hospital | ICU        | Apr    | 0.056          | 0.053 | 0.060 | 0.056          | 0.052 | 0.061 |
| Hospital | ICU        | May    | 0.031          | 0.023 | 0.039 | 0.031          | 0.024 | 0.042 |
| Hospital | ICU        | Jun    | 0.026          | 0.017 | 0.036 | 0.026          | 0.019 | 0.047 |
| Hospital | Death      | Feb    | 0.257          | 0.241 | 0.276 | 0.257          | 0.238 | 0.272 |
| Hospital | Death      | Mar    | 0.247          | 0.243 | 0.251 | 0.247          | 0.242 | 0.251 |
| Hospital | Death      | Apr    | 0.198          | 0.190 | 0.208 | 0.198          | 0.192 | 0.205 |
| Hospital | Death      | May    | 0.136          | 0.119 | 0.154 | 0.136          | 0.125 | 0.150 |
| Hospital | Death      | Jun    | 0.066          | 0.050 | 0.080 | 0.066          | 0.047 | 0.091 |
| ICU      | Post-ICU   | Feb    | 0.540          | 0.472 | 0.585 | 0.541          | 0.480 | 0.584 |
| ICU      | Post-ICU   | Mar    | 0.559          | 0.541 | 0.578 | 0.558          | 0.543 | 0.567 |
| ICU      | Post-ICU   | Apr    | 0.671          | 0.634 | 0.701 | 0.672          | 0.643 | 0.713 |
| ICU      | Post-ICU   | MayJun | 0.739          | 0.636 | 0.824 | 0.741          | 0.637 | 0.831 |
| ICU      | Death      | Feb    | 0.460          | 0.415 | 0.528 | 0.459          | 0.416 | 0.520 |
| ICU      | Death      | Mar    | 0.441          | 0.422 | 0.459 | 0.442          | 0.433 | 0.457 |
| ICU      | Death      | Apr    | 0.329          | 0.299 | 0.366 | 0.328          | 0.287 | 0.357 |
| ICU      | Death      | MayJun | 0.261          | 0.176 | 0.364 | 0.259          | 0.169 | 0.363 |
| Post-ICU | Discharge  | Feb    | 0.694          | 0.624 | 0.765 | 0.694          | 0.585 | 0.791 |
| Post-ICU | Discharge  | Mar    | 0.916          | 0.903 | 0.924 | 0.916          | 0.897 | 0.927 |

|          |           |        |       |       |       |       |       |       |
|----------|-----------|--------|-------|-------|-------|-------|-------|-------|
| Post-ICU | Discharge | Apr    | 0.911 | 0.874 | 0.933 | 0.911 | 0.892 | 0.937 |
| Post-ICU | Discharge | MayJun | 0.849 | 0.701 | 0.922 | 0.848 | 0.742 | 0.930 |
| Post-ICU | Death     | Feb    | 0.306 | 0.235 | 0.376 | 0.306 | 0.209 | 0.415 |
| Post-ICU | Death     | Mar    | 0.084 | 0.076 | 0.097 | 0.084 | 0.073 | 0.103 |
| Post-ICU | Death     | Apr    | 0.089 | 0.067 | 0.126 | 0.089 | 0.063 | 0.108 |
| Post-ICU | Death     | MayJun | 0.151 | 0.078 | 0.299 | 0.152 | 0.070 | 0.258 |

Table A.12: Estimated probabilities (95% confidence intervals) of next events, given current state, by month of admission and missing outcome assumption: (a) censoring at 1 day after last observed event; (b) ignoring missing outcomes.

Estimated probabilities of final events are given in Table A.13:

| Final Event | Month | CENSORING       |       |       | MISSING         |       |       |
|-------------|-------|-----------------|-------|-------|-----------------|-------|-------|
|             |       | Pr(Final Event) | Lower | Upper | Pr(Final Event) | Lower | Upper |
| Death       | Feb   | 0.346           | 0.325 | 0.366 | 0.346           | 0.329 | 0.368 |
| Death       | Mar   | 0.298           | 0.293 | 0.303 | 0.298           | 0.293 | 0.303 |
| Death       | Apr   | 0.220           | 0.211 | 0.230 | 0.220           | 0.210 | 0.228 |
| Death       | May   | 0.147           | 0.133 | 0.159 | 0.148           | 0.128 | 0.167 |
| Death       | Jun   | 0.076           | 0.063 | 0.106 | 0.075           | 0.058 | 0.104 |
| Discharge   | Feb   | 0.654           | 0.634 | 0.675 | 0.654           | 0.632 | 0.671 |
| Discharge   | Mar   | 0.702           | 0.697 | 0.707 | 0.702           | 0.697 | 0.707 |
| Discharge   | Apr   | 0.780           | 0.770 | 0.789 | 0.780           | 0.772 | 0.790 |
| Discharge   | May   | 0.853           | 0.841 | 0.867 | 0.852           | 0.833 | 0.872 |
| Discharge   | Jun   | 0.924           | 0.894 | 0.937 | 0.925           | 0.896 | 0.942 |

Table A.13: Estimated probabilities (95% confidence intervals) of final events, given current state (hospital-fatality risks and complement), by month of admission and missing outcome assumption: (a) censoring at 1 day after last observed event; (b) ignoring missing outcomes.

Estimated times to next events, under the censoring assumption only, are given in Table A.14:

| From     | Next Event | Month  | Mean | 95% CI of Mean |      | Median | 95% CI of Median |      | 25%-ile | 95% CI of 25%-ile |     | 75%-ile | 95% CI of 75%-ile |      |
|----------|------------|--------|------|----------------|------|--------|------------------|------|---------|-------------------|-----|---------|-------------------|------|
|          |            |        |      |                |      |        |                  |      |         |                   |     |         |                   |      |
| Hospital | Discharge  | Feb    | 34.0 | 31.4           | 35.5 | 22.4   | 21.1             | 23.6 | 7.7     | 7.3               | 8.2 | 48.5    | 46.0              | 51.1 |
|          | Discharge  | Mar    | 17.3 | 17.0           | 17.5 | 11.3   | 11.2             | 11.6 | 3.9     | 3.8               | 4.0 | 24.6    | 24.3              | 25.0 |
|          | Discharge  | Apr    | 16.5 | 16.1           | 16.9 | 10.9   | 10.6             | 11.2 | 3.7     | 3.6               | 3.9 | 23.6    | 23.0              | 24.2 |
|          | Discharge  | May    | 11.6 | 11.1           | 12.2 | 7.7    | 7.2              | 8.0  | 2.6     | 2.5               | 2.8 | 16.6    | 15.6              | 17.3 |
|          | Discharge  | Jun    | 7.7  | 6.9            | 8.6  | 5.1    | 4.7              | 5.6  | 1.8     | 1.6               | 1.9 | 11.0    | 10.3              | 12.1 |
|          | ICU        | Feb    | 7.3  | 6.0            | 8.7  | 2.8    | 2.5              | 3.3  | 1.3     | 1.1               | 1.4 | 6.8     | 5.9               | 7.9  |
|          | ICU        | Mar    | 6.6  | 6.0            | 7.1  | 2.6    | 2.5              | 2.7  | 1.1     | 1.1               | 1.2 | 6.2     | 5.9               | 6.6  |
|          | ICU        | Apr    | 5.6  | 5.2            | 6.5  | 2.2    | 2.0              | 2.4  | 1.0     | 0.9               | 1.1 | 5.2     | 4.7               | 5.7  |
|          | ICU        | May    | 4.1  | 3.2            | 6.2  | 1.6    | 1.1              | 2.3  | 0.7     | 0.5               | 1.0 | 3.8     | 2.7               | 5.6  |
|          | ICU        | Jun    | 2.5  | 1.1            | 4.3  | 1.0    | 0.6              | 1.6  | 0.4     | 0.3               | 0.7 | 2.3     | 1.5               | 3.7  |
|          | Death      | Feb    | 27.5 | 25.1           | 30.0 | 18.0   | 16.4             | 19.8 | 8.7     | 8.0               | 9.5 | 35.1    | 32.2              | 38.6 |
|          | Death      | Mar    | 8.4  | 8.2            | 8.6  | 5.5    | 5.4              | 5.6  | 2.7     | 2.6               | 2.7 | 10.7    | 10.5              | 11.0 |
|          | Death      | Apr    | 10.1 | 9.6            | 10.4 | 6.6    | 6.4              | 6.9  | 3.2     | 3.1               | 3.4 | 12.9    | 12.3              | 13.5 |
|          | Death      | May    | 9.7  | 8.3            | 11.5 | 6.4    | 5.9              | 7.3  | 3.1     | 2.8               | 3.6 | 12.5    | 11.5              | 14.2 |
| Death    | Jun        | 6.5    | 4.9  | 9.1            | 4.2  | 2.9    | 5.8              | 2.1  | 1.4     | 2.8               | 8.3 | 5.7     | 11.3              |      |
| ICU      | Post-ICU   | Feb    | 14.1 | 11.9           | 17.1 | 10.3   | 9.1              | 13.0 | 5.0     | 4.3               | 6.4 | 19.1    | 16.9              | 24.0 |
|          | Post-ICU   | Mar    | 17.5 | 16.9           | 18.4 | 12.8   | 12.3             | 13.4 | 6.2     | 5.9               | 6.5 | 23.7    | 22.6              | 24.6 |
|          | Post-ICU   | Apr    | 14.6 | 13.4           | 16.4 | 10.7   | 10.0             | 12.1 | 5.2     | 4.8               | 5.9 | 19.8    | 18.3              | 22.6 |
|          | Post-ICU   | MayJun | 10.3 | 8.8            | 12.2 | 7.5    | 6.6              | 9.7  | 3.7     | 3.2               | 4.7 | 13.9    | 12.1              | 18.0 |
|          | Death      | Feb    | 13.6 | 12.5           | 15.4 | 10.8   | 9.6              | 12.0 | 5.5     | 5.0               | 6.1 | 18.7    | 16.6              | 20.7 |
|          | Death      | Mar    | 12.0 | 11.6           | 12.6 | 9.5    | 9.2              | 10.1 | 4.9     | 4.6               | 5.3 | 16.5    | 16.0              | 17.2 |
|          | Death      | Apr    | 14.0 | 12.3           | 15.8 | 11.1   | 9.9              | 12.3 | 5.7     | 5.2               | 6.4 | 19.2    | 17.1              | 21.5 |
|          | Death      | MayJun | 4.6  | 3.4            | 6.8  | 3.6    | 2.5              | 5.3  | 1.9     | 1.3               | 2.7 | 6.3     | 4.3               | 9.1  |

|          |           |        |      |      |      |      |      |      |      |      |      |      |      |      |
|----------|-----------|--------|------|------|------|------|------|------|------|------|------|------|------|------|
| Post-ICU | Discharge | Feb    | 23.3 | 19.5 | 25.4 | 19.8 | 17.7 | 23.0 | 11.6 | 10.3 | 13.3 | 31.3 | 27.9 | 36.1 |
|          | Discharge | Mar    | 22.8 | 22.2 | 23.6 | 19.5 | 18.6 | 20.4 | 11.4 | 10.9 | 12.0 | 30.7 | 29.2 | 31.8 |
|          | Discharge | Apr    | 19.8 | 18.7 | 21.5 | 16.9 | 15.9 | 18.3 | 9.9  | 9.2  | 10.7 | 26.7 | 25.0 | 28.9 |
|          | Discharge | MayJun | 13.1 | 10.9 | 17.3 | 11.1 | 7.9  | 13.5 | 6.5  | 4.6  | 7.9  | 17.6 | 12.6 | 21.0 |
|          | Death     | Feb    | 11.3 | 8.0  | 16.0 | 7.5  | 5.7  | 9.9  | 4.3  | 3.2  | 5.5  | 13.4 | 9.9  | 18.5 |
|          | Death     | Mar    | 13.3 | 10.8 | 17.7 | 8.8  | 7.5  | 10.1 | 5.1  | 4.4  | 5.8  | 15.6 | 14.2 | 18.2 |
|          | Death     | Apr    | 14.0 | 10.0 | 22.4 | 9.3  | 6.7  | 12.0 | 5.4  | 3.9  | 7.0  | 16.5 | 11.9 | 22.8 |
|          | Death     | MayJun | 11.0 | 5.0  | 24.0 | 7.3  | 3.3  | 15.5 | 4.2  | 1.7  | 9.0  | 13.0 | 5.9  | 27.9 |

Table A.14: Summaries of times from current state to next event, conditional on experiencing that next event, by month of admission, assuming missing outcomes are censoring at 1 day after last observed event.

Estimated times to final events (total length of stay in hospital), by pathway through hospital, are given in Table A.15, under the censoring assumption only:

| Outcome | Pathway                     | Month | Mean | 95% CI of Mean |                | Median | 95% CI of Median |                  |         | 95% CI of 25%-ile |         | 95% CI of 75%-ile |      |      |
|---------|-----------------------------|-------|------|----------------|----------------|--------|------------------|------------------|---------|-------------------|---------|-------------------|------|------|
|         |                             |       |      | Mean           | 95% CI of Mean |        | Median           | 95% CI of Median | 25%-ile | 95% CI of 25%-ile | 75%-ile | 95% CI of 75%-ile |      |      |
| Death   | Hospital-Death              | Feb   | 27.5 | 24.9           | 29.9           | 18.2   | 16.3             | 19.7             | 9.1     | 8.1               | 9.5     | 34.7              | 31.6 | 38.3 |
| Death   | Hospital-Death              | Mar   | 8.4  | 8.2            | 8.6            | 5.5    | 5.3              | 5.7              | 2.7     | 2.5               | 2.8     | 10.7              | 10.4 | 11.1 |
| Death   | Hospital-Death              | Apr   | 10.1 | 9.8            | 10.6           | 6.7    | 6.4              | 7.0              | 3.3     | 3.1               | 3.4     | 13.0              | 12.4 | 13.6 |
| Death   | Hospital-Death              | May   | 9.7  | 8.3            | 11.0           | 6.4    | 5.7              | 7.5              | 3.1     | 2.7               | 3.6     | 12.4              | 11.0 | 14.7 |
| Death   | Hospital-Death              | Jun   | 6.5  | 4.7            | 8.3            | 4.2    | 3.1              | 5.6              | 2.1     | 1.5               | 2.7     | 8.3               | 6.0  | 10.7 |
| Death   | Hospital-ICU-Death          | Feb   | 20.9 | 19.1           | 23.0           | 16.0   | 14.5             | 17.9             | 9.6     | 8.5               | 10.5    | 26.1              | 23.3 | 29.5 |
| Death   | Hospital-ICU-Death          | Mar   | 18.6 | 17.9           | 19.5           | 14.5   | 13.8             | 15.0             | 8.5     | 8.0               | 8.8     | 23.6              | 22.3 | 24.1 |
| Death   | Hospital-ICU-Death          | Apr   | 19.6 | 17.4           | 21.6           | 15.4   | 13.9             | 16.4             | 9.0     | 8.1               | 9.6     | 25.0              | 22.5 | 26.5 |
| Death   | Hospital-ICU-Death          | May   | 8.7  | 6.6            | 11.2           | 6.5    | 4.7              | 8.4              | 3.8     | 2.8               | 5.0     | 10.4              | 7.6  | 13.5 |
| Death   | Hospital-ICU-Death          | Jun   | 7.1  | 5.7            | 9.2            | 5.5    | 3.7              | 7.9              | 3.3     | 2.2               | 4.6     | 9.0               | 6.0  | 12.7 |
| Death   | Hospital-ICU-Post-ICU-Death | Feb   | 32.8 | 30.4           | 38.7           | 26.6   | 23.3             | 29.5             | 17.0    | 15.2              | 19.3    | 40.3              | 35.5 | 44.7 |

|           |                                 |     |      |      |      |      |      |      |      |      |      |      |      |      |
|-----------|---------------------------------|-----|------|------|------|------|------|------|------|------|------|------|------|------|
| Death     | Hospital-ICU-Post-ICU-Death     | Mar | 37.4 | 34.8 | 42.1 | 30.8 | 28.7 | 32.5 | 20.0 | 18.5 | 21.3 | 47.4 | 43.6 | 49.1 |
| Death     | Hospital-ICU-Post-ICU-Death     | Apr | 34.2 | 29.6 | 44.2 | 28.4 | 24.6 | 32.0 | 18.5 | 16.1 | 21.3 | 42.2 | 37.2 | 48.7 |
| Death     | Hospital-ICU-Post-ICU-Death     | May | 25.4 | 21.3 | 35.8 | 20.6 | 15.8 | 31.6 | 13.5 | 10.2 | 21.1 | 30.6 | 23.9 | 46.6 |
| Death     | Hospital-ICU-Post-ICU-Death     | Jun | 23.8 | 20.4 | 35.0 | 19.8 | 15.1 | 30.1 | 12.8 | 9.7  | 20.1 | 29.7 | 22.7 | 44.5 |
| Discharge | Hospital-Discharge              | Feb | 34.0 | 31.5 | 36.1 | 22.4 | 20.9 | 23.9 | 7.6  | 7.2  | 8.5  | 48.0 | 44.9 | 52.4 |
| Discharge | Hospital-Discharge              | Mar | 17.3 | 17.0 | 17.5 | 11.3 | 10.9 | 11.7 | 3.8  | 3.7  | 4.1  | 24.4 | 23.7 | 25.3 |
| Discharge | Hospital-Discharge              | Apr | 16.5 | 16.1 | 16.9 | 10.8 | 10.5 | 11.2 | 3.7  | 3.6  | 3.9  | 23.7 | 22.8 | 24.4 |
| Discharge | Hospital-Discharge              | May | 11.6 | 11.0 | 12.2 | 7.7  | 7.3  | 8.1  | 2.7  | 2.5  | 2.8  | 16.5 | 15.6 | 17.6 |
| Discharge | Hospital-Discharge              | Jun | 7.7  | 6.9  | 8.7  | 5.1  | 4.7  | 5.7  | 1.8  | 1.6  | 2.0  | 10.9 | 10.2 | 12.2 |
| Discharge | Hospital-ICU-Post-ICU-Discharge | Feb | 44.7 | 42.6 | 48.3 | 39.1 | 36.2 | 43.8 | 27.1 | 24.8 | 29.9 | 55.6 | 51.3 | 62.0 |
| Discharge | Hospital-ICU-Post-ICU-Discharge | Mar | 47.0 | 45.9 | 48.7 | 42.4 | 40.7 | 43.0 | 29.0 | 27.6 | 29.6 | 59.9 | 57.4 | 61.1 |
| Discharge | Hospital-ICU-Post-ICU-Discharge | Apr | 40.1 | 37.6 | 42.6 | 35.3 | 33.8 | 37.8 | 24.1 | 23.1 | 26.0 | 50.4 | 47.7 | 53.7 |
| Discharge | Hospital-ICU-Post-ICU-Discharge | May | 27.5 | 24.5 | 32.7 | 24.4 | 20.3 | 28.7 | 16.5 | 13.9 | 19.6 | 34.5 | 28.7 | 40.3 |
| Discharge | Hospital-ICU-Post-ICU-Discharge | Jun | 25.9 | 22.3 | 30.8 | 22.9 | 19.5 | 27.8 | 15.7 | 13.5 | 19.0 | 32.6 | 27.5 | 39.3 |
| Death     | Hospital-Death                  | Feb | 27.5 | 24.9 | 29.9 | 18.2 | 16.3 | 19.7 | 9.1  | 8.1  | 9.5  | 34.7 | 31.6 | 38.3 |
| Death     | Hospital-Death                  | Mar | 8.4  | 8.2  | 8.6  | 5.5  | 5.3  | 5.7  | 2.7  | 2.5  | 2.8  | 10.7 | 10.4 | 11.1 |
| Death     | Hospital-Death                  | Apr | 10.1 | 9.8  | 10.6 | 6.7  | 6.4  | 7.0  | 3.3  | 3.1  | 3.4  | 13.0 | 12.4 | 13.6 |
| Death     | Hospital-Death                  | May | 9.7  | 8.3  | 11.0 | 6.4  | 5.7  | 7.5  | 3.1  | 2.7  | 3.6  | 12.4 | 11.0 | 14.7 |
| Death     | Hospital-Death                  | Jun | 6.5  | 4.7  | 8.3  | 4.2  | 3.1  | 5.6  | 2.1  | 1.5  | 2.7  | 8.3  | 6.0  | 10.7 |
| Death     | Hospital-ICU-Death              | Feb | 20.9 | 19.1 | 23.0 | 16.0 | 14.5 | 17.9 | 9.6  | 8.5  | 10.5 | 26.1 | 23.3 | 29.5 |
| Death     | Hospital-ICU-Death              | Mar | 18.6 | 17.9 | 19.5 | 14.5 | 13.8 | 15.0 | 8.5  | 8.0  | 8.8  | 23.6 | 22.3 | 24.1 |
| Death     | Hospital-ICU-Death              | Apr | 19.6 | 17.4 | 21.6 | 15.4 | 13.9 | 16.4 | 9.0  | 8.1  | 9.6  | 25.0 | 22.5 | 26.5 |
| Death     | Hospital-ICU-Death              | May | 8.7  | 6.6  | 11.2 | 6.5  | 4.7  | 8.4  | 3.8  | 2.8  | 5.0  | 10.4 | 7.6  | 13.5 |
| Death     | Hospital-ICU-Death              | Jun | 7.1  | 5.7  | 9.2  | 5.5  | 3.7  | 7.9  | 3.3  | 2.2  | 4.6  | 9.0  | 6.0  | 12.7 |
| Death     | Averaged over pathways          | Feb | 26.6 | 25.0 | 29.1 | 17.8 | 17.1 | 19.9 | 8.9  | 8.5  | 10.3 | 33.7 | 31.4 | 36.4 |
| Death     | Averaged over pathways          | Mar | 10.5 | 10.2 | 10.8 | 6.7  | 6.3  | 6.9  | 3.2  | 2.9  | 3.3  | 13.2 | 12.7 | 13.9 |

|           |                        |     |      |      |      |      |      |      |     |     |     |      |      |      |
|-----------|------------------------|-----|------|------|------|------|------|------|-----|-----|-----|------|------|------|
| Death     | Averaged over pathways | Apr | 11.3 | 10.9 | 11.8 | 7.1  | 6.9  | 7.7  | 3.2 | 3.2 | 3.7 | 14.5 | 13.8 | 15.5 |
| Death     | Averaged over pathways | May | 10.1 | 8.9  | 11.9 | 6.5  | 5.9  | 7.4  | 3.0 | 2.9 | 3.6 | 12.4 | 11.3 | 14.4 |
| Death     | Averaged over pathways | Jun | 7.2  | 5.5  | 9.0  | 4.7  | 3.3  | 6.0  | 2.3 | 1.5 | 2.8 | 9.1  | 6.6  | 11.7 |
| Discharge | Averaged over pathways | Feb | 34.9 | 33.1 | 36.7 | 24.6 | 22.8 | 26.1 | 8.8 | 7.9 | 9.6 | 49.5 | 46.3 | 52.3 |
| Discharge | Averaged over pathways | Mar | 19.5 | 19.4 | 19.7 | 12.7 | 12.2 | 13.5 | 4.3 | 4.1 | 4.7 | 27.7 | 27.1 | 29.0 |
| Discharge | Averaged over pathways | Apr | 17.6 | 17.3 | 18.0 | 11.6 | 11.2 | 12.2 | 4.0 | 3.8 | 4.3 | 25.3 | 24.2 | 26.2 |
| Discharge | Averaged over pathways | May | 12.0 | 11.5 | 12.6 | 7.8  | 7.4  | 8.7  | 2.9 | 2.5 | 3.0 | 17.1 | 16.3 | 18.4 |
| Discharge | Averaged over pathways | Jun | 8.1  | 7.2  | 9.1  | 5.1  | 4.8  | 5.8  | 1.7 | 1.7 | 2.0 | 11.3 | 10.6 | 12.6 |

Table A.15: Summaries of times from hospital admission to final events (total length of stay), by pathway through hospital and month of admission, conditional on experiencing that final event and assuming missing outcomes are censoring at 1 day after last observed event.

Estimated total lengths of stay in hospital by month of admission, averaged over pathways and final outcomes, are given in Table A.16, under the censoring assumption only:

| Month | Mean | 95% CI of Mean |      | Median | 95% CI of Median |      | 25%-ile | 95% CI of 25%-ile |     | 75%-ile | 95% CI of 75%-ile |      |
|-------|------|----------------|------|--------|------------------|------|---------|-------------------|-----|---------|-------------------|------|
|       |      |                |      |        |                  |      |         |                   |     |         |                   |      |
| Feb   | 32.0 | 30.7           | 33.6 | 21.2   | 20.5             | 22.8 | 8.9     | 8.2               | 9.5 | 43.1    | 41.6              | 45.9 |
| Mar   | 16.8 | 16.6           | 17.1 | 10.3   | 9.8              | 10.5 | 3.7     | 3.6               | 3.9 | 22.9    | 22.4              | 24.0 |
| Apr   | 16.2 | 15.8           | 16.5 | 10.3   | 10.1             | 10.7 | 3.8     | 3.7               | 4.0 | 22.7    | 22.2              | 23.5 |
| May   | 11.7 | 11.1           | 12.4 | 7.7    | 7.2              | 8.1  | 2.8     | 2.6               | 3.0 | 16.7    | 15.7              | 17.4 |
| Jun   | 8.0  | 7.2            | 8.8  | 5.2    | 4.7              | 5.8  | 1.8     | 1.6               | 2.1 | 11.5    | 10.2              | 12.7 |

Table A.16: Summaries of lengths of stay in hospital (total time in hospital), by month of admission and averaged over pathways and final outcomes, by month of admission, assuming missing outcomes are censoring at 1 day after last observed event.

### A.3.3 Model regressed on hospital bed capacity

Parameter estimates from this model are given in Table A.17:

|          |           |              |                   | Estimate |         | SE     |         | OR or ETR |         | Lower  |         | Upper  |         |
|----------|-----------|--------------|-------------------|----------|---------|--------|---------|-----------|---------|--------|---------|--------|---------|
| From     | To        | Distribution | Parameter         | Censor   | Missing | Censor | Missing | Censor    | Missing | Censor | Missing | Censor | Missing |
| Hospital | Discharge |              | $\pi_{1,2}$       | 0.6655   | 0.6658  | 0.0234 | 0.0234  |           |         |        |         |        |         |
| Hospital | ICU       |              | $\pi_{1,3}$       | 0.1020   | 0.1018  | 0.0199 | 0.0199  |           |         |        |         |        |         |
| Hospital | Death     |              | $\pi_{1,5}$       | 0.2325   | 0.2324  | 0.0143 | 0.0143  |           |         |        |         |        |         |
| Hospital | Discharge |              | $\pi_{1,2}$ Med.  | -0.1409  | -0.1451 | 0.0534 | 0.0535  | 0.8686    | 0.8650  | 0.7823 | 0.7788  | 0.9644 | 0.9606  |
| Hospital | Discharge |              | $\pi_{1,2}$ Small | -0.7980  | -0.7834 | 0.0598 | 0.0595  | 0.4502    | 0.4568  | 0.4004 | 0.4065  | 0.5062 | 0.5134  |
| Hospital | ICU       |              | $\pi_{1,3}$ Med.  | 0.1103   | 0.1115  | 0.0351 | 0.0351  | 1.1166    | 1.1179  | 1.0425 | 1.0437  | 1.1961 | 1.1974  |
| Hospital | ICU       |              | $\pi_{1,3}$ Small | -0.2574  | -0.2565 | 0.0342 | 0.0342  | 0.7731    | 0.7737  | 0.7230 | 0.7236  | 0.8267 | 0.8274  |
| Hospital | Discharge | gengamma     | $\mu_{1,2}$       | 2.8221   | 2.8217  | 0.0131 | 0.0131  |           |         |        |         |        |         |
| Hospital | Discharge | gengamma     | $\sigma_{1,2}$    | 1.0662   | 1.0666  | 0.0068 | 0.0068  |           |         |        |         |        |         |
| Hospital | Discharge | gengamma     | $Q_{1,2}$         | 1.2751   | 1.2760  | 0.0185 | 0.0185  |           |         |        |         |        |         |
| Hospital | Discharge | gengamma     | $T_{1,2}$ Med.    | 0.1544   | 0.1566  | 0.0197 | 0.0197  | 1.1670    | 1.1695  | 1.1229 | 1.1252  | 1.2129 | 1.2155  |
| Hospital | Discharge | gengamma     | $T_{1,2}$ Small   | 0.4556   | 0.4543  | 0.0172 | 0.0172  | 1.5771    | 1.5751  | 1.5247 | 1.5229  | 1.6312 | 1.6292  |
| Hospital | ICU       | gengamma     | $\mu_{1,3}$       | 0.8398   | 0.8486  | 0.0432 | 0.0431  |           |         |        |         |        |         |
| Hospital | ICU       | gengamma     | $\sigma_{1,3}$    | 1.2415   | 1.2441  | 0.0124 | 0.0123  |           |         |        |         |        |         |
| Hospital | ICU       | gengamma     | $Q_{1,3}$         | -0.2239  | -0.2101 | 0.0603 | 0.0600  |           |         |        |         |        |         |
| Hospital | ICU       | gengamma     | $T_{1,3}$ Med.    | 0.0158   | 0.0175  | 0.0624 | 0.0625  | 1.0159    | 1.0177  | 0.8990 | 0.9003  | 1.1481 | 1.1503  |
| Hospital | ICU       | gengamma     | $T_{1,3}$ Small   | -0.0185  | -0.0255 | 0.0717 | 0.0720  | 0.9817    | 0.9748  | 0.8530 | 0.8466  | 1.1297 | 1.1225  |
| Hospital | Death     | gengamma     | $\mu_{1,5}$       | 1.8675   | 1.8685  | 0.0192 | 0.0192  |           |         |        |         |        |         |
| Hospital | Death     | gengamma     | $\sigma_{1,5}$    | 1.0470   | 1.0471  | 0.0078 | 0.0078  |           |         |        |         |        |         |
| Hospital | Death     | gengamma     | $Q_{1,5}$         | 0.3217   | 0.3247  | 0.0277 | 0.0278  |           |         |        |         |        |         |
| Hospital | Death     | gengamma     | $T_{1,5}$ Med.    | 0.0646   | 0.0680  | 0.0312 | 0.0312  | 1.0667    | 1.0704  | 1.0034 | 1.0068  | 1.1340 | 1.1380  |
| Hospital | Death     | gengamma     | $T_{1,5}$ Small   | 0.1945   | 0.1964  | 0.0318 | 0.0318  | 1.2148    | 1.2170  | 1.1413 | 1.1434  | 1.2930 | 1.2954  |
| ICU      | Post-ICU  |              | $\pi_{3,4}$       | 0.5548   | 0.5549  | 0.0373 | 0.0373  |           |         |        |         |        |         |
| ICU      | Death     |              | $\pi_{3,5}$       | 0.4452   | 0.4451  | 0.0373 | 0.0373  |           |         |        |         |        |         |

|          |           |          |                   |         |         |        |        |        |        |        |        |        |        |
|----------|-----------|----------|-------------------|---------|---------|--------|--------|--------|--------|--------|--------|--------|--------|
| ICU      | Post-ICU  |          | $\pi_{3,4}$ Med.  | 0.1041  | 0.1042  | 0.1007 | 0.1007 | 1.1097 | 1.1098 | 0.9110 | 0.9111 | 1.3518 | 1.3519 |
| ICU      | Post-ICU  |          | $\pi_{3,4}$ Small | -1.2325 | -1.2359 | 0.1435 | 0.1437 | 0.2916 | 0.2906 | 0.2201 | 0.2193 | 0.3863 | 0.3851 |
| ICU      | Post-ICU  | gamma    | shape             | 1.2790  | 1.2789  | 0.0276 | 0.0276 |        |        |        |        |        |        |
| ICU      | Post-ICU  | gamma    | rate              | 0.0757  | 0.0757  | 0.0353 | 0.0353 |        |        |        |        |        |        |
| ICU      | Post-ICU  | gamma    | $T_{3,4}$ Med.    | 0.0018  | 0.0010  | 0.0608 | 0.0609 | 1.0018 | 1.0010 | 0.8892 | 0.8885 | 1.1286 | 1.1278 |
| ICU      | Post-ICU  | gamma    | $T_{3,4}$ Small   | 0.0861  | 0.0869  | 0.0577 | 0.0577 | 1.0899 | 1.0908 | 0.9734 | 0.9742 | 1.2205 | 1.2214 |
| ICU      | Death     | gamma    | shape             | 1.4954  | 1.4945  | 0.0324 | 0.0324 |        |        |        |        |        |        |
| ICU      | Death     | gamma    | rate              | 0.1207  | 0.1206  | 0.0396 | 0.0396 |        |        |        |        |        |        |
| ICU      | Death     | gamma    | $T_{3,5}$ Med.    | 0.1132  | 0.1138  | 0.0601 | 0.0602 | 1.1199 | 1.1205 | 0.9954 | 0.9959 | 1.2600 | 1.2607 |
| ICU      | Death     | gamma    | $T_{3,5}$ Small   | -0.0400 | -0.0402 | 0.1047 | 0.1047 | 0.9608 | 0.9606 | 0.7825 | 0.7824 | 1.1796 | 1.1795 |
| Post-ICU | Discharge |          | $\pi_{4,2}$       | 0.8973  | 0.8974  | 0.0892 | 0.0892 |        |        |        |        |        |        |
| Post-ICU | Death     |          | $\pi_{4,5}$       | 0.1027  | 0.1026  | 0.0892 | 0.0892 |        |        |        |        |        |        |
| Post-ICU | Discharge |          | $\pi_{4,2}$ Med.  | -0.0295 | -0.0396 | 0.2457 | 0.2466 | 0.9709 | 0.9611 | 0.5998 | 0.5927 | 1.5715 | 1.5585 |
| Post-ICU | Discharge |          | $\pi_{4,2}$ Small | -0.4192 | -0.4110 | 0.2750 | 0.2742 | 0.6575 | 0.6630 | 0.3835 | 0.3873 | 1.1273 | 1.1348 |
| Post-ICU | Discharge | gengamma | $\mu_{4,2}$       | 3.0501  | 3.0507  | 0.0284 | 0.0285 |        |        |        |        |        |        |
| Post-ICU | Discharge | gengamma | $\sigma_{4,2}$    | 0.6846  | 0.6847  | 0.0202 | 0.0203 |        |        |        |        |        |        |
| Post-ICU | Discharge | gengamma | $Q_{4,2}$         | 0.6873  | 0.6901  | 0.0549 | 0.0553 |        |        |        |        |        |        |
| Post-ICU | Discharge | gengamma | $T_{4,2}$ Med.    | 0.1656  | 0.1661  | 0.0533 | 0.0533 | 1.1801 | 1.1807 | 1.0631 | 1.0635 | 1.3101 | 1.3107 |
| Post-ICU | Discharge | gengamma | $T_{4,2}$ Small   | 0.2204  | 0.2205  | 0.0513 | 0.0513 | 1.2465 | 1.2467 | 1.1273 | 1.1274 | 1.3784 | 1.3786 |
| Post-ICU | Death     | gengamma | $\mu_{4,5}$       | 2.0590  | 2.0846  | 0.1337 | 0.1342 |        |        |        |        |        |        |
| Post-ICU | Death     | gengamma | $\sigma_{4,5}$    | 0.8253  | 0.8285  | 0.0580 | 0.0570 |        |        |        |        |        |        |
| Post-ICU | Death     | gengamma | $Q_{4,5}$         | -0.2999 | -0.2467 | 0.2644 | 0.2650 |        |        |        |        |        |        |
| Post-ICU | Death     | gengamma | $T_{4,5}$ Med.    | 0.0547  | 0.0493  | 0.1930 | 0.1938 | 1.0563 | 1.0506 | 0.7236 | 0.7185 | 1.5418 | 1.5361 |
| Post-ICU | Death     | gengamma | $T_{4,5}$ Small   | -0.1179 | -0.1366 | 0.2235 | 0.2244 | 0.8887 | 0.8723 | 0.5735 | 0.5619 | 1.3772 | 1.3543 |

Table A.17: parameter estimates for the model regressed on hospital bed capacity, by missing outcome assumption: (a) censoring at

1 day after last observed event; (b) ignoring missing outcomes. OR refers to odds ratios for the probabilities of each transition in



each hospital bed capacity relative to large hospitals. ETR refers to the expected time ratios for the times of each transition in each hospital bed capacity relative to large hospitals.

Comparison of non-parametric and parametric cumulative incidence curves, under both the missing outcome assumptions, are shown in Figure A.5:

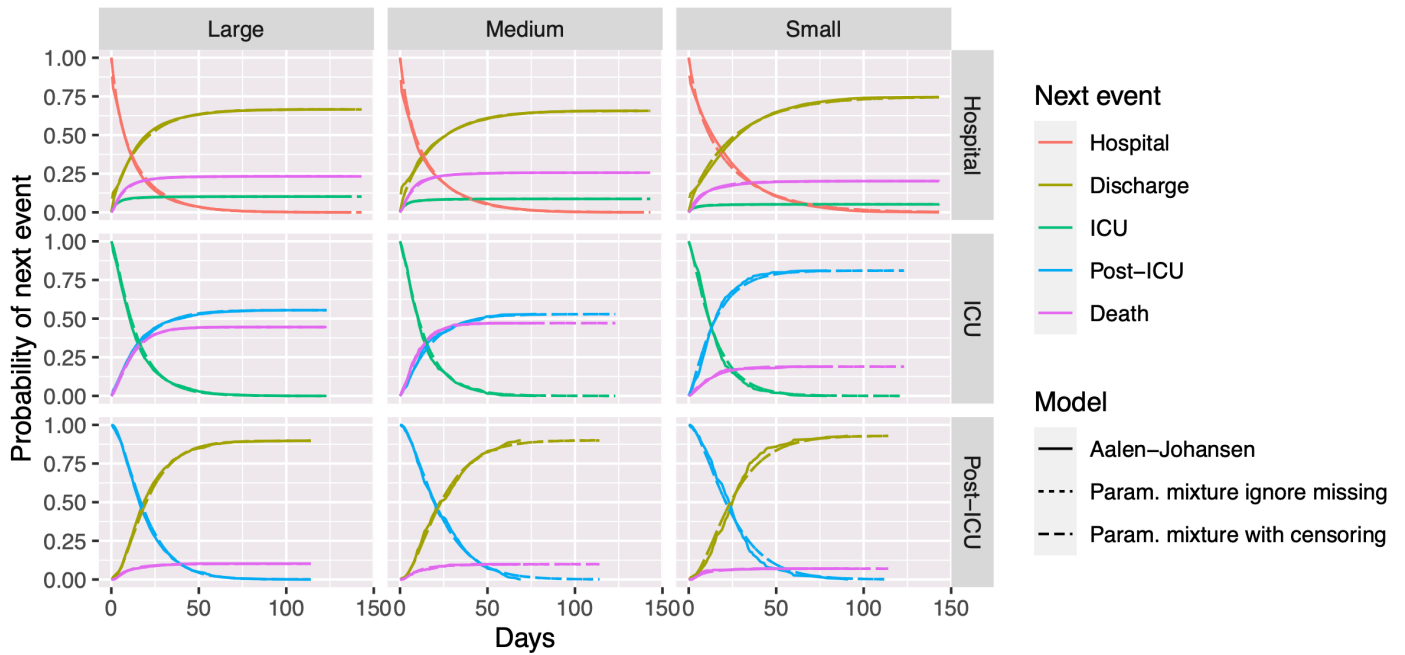

Figure A.5: Parametric versus non-parametric cumulative incidence estimates, by starting state (rows), next event (colours), hospital bed capacity (columns) and model (line type).

Estimated probabilities of next events are given in Table A.18:

| From     | Next Event | Hospital Bed Capacity | CENSORING      |       |       | MISSING        |       |       |
|----------|------------|-----------------------|----------------|-------|-------|----------------|-------|-------|
|          |            |                       | Pr(Next Event) | Lower | Upper | Pr(Next Event) | Lower | Upper |
| Hospital | Discharge  | Large                 | 0.666          | 0.660 | 0.670 | 0.666          | 0.661 | 0.670 |
| Hospital | Discharge  | Medium                | 0.656          | 0.645 | 0.670 | 0.657          | 0.645 | 0.671 |
| Hospital | Discharge  | Small                 | 0.747          | 0.737 | 0.760 | 0.746          | 0.734 | 0.755 |
| Hospital | ICU        | Large                 | 0.102          | 0.100 | 0.105 | 0.102          | 0.098 | 0.105 |

|          |           |        |       |       |       |       |       |       |
|----------|-----------|--------|-------|-------|-------|-------|-------|-------|
| Hospital | ICU       | Medium | 0.087 | 0.079 | 0.094 | 0.087 | 0.082 | 0.095 |
| Hospital | ICU       | Small  | 0.052 | 0.047 | 0.056 | 0.052 | 0.048 | 0.058 |
| Hospital | Death     | Large  | 0.233 | 0.226 | 0.238 | 0.232 | 0.228 | 0.237 |
| Hospital | Death     | Medium | 0.256 | 0.245 | 0.266 | 0.256 | 0.242 | 0.266 |
| Hospital | Death     | Small  | 0.202 | 0.191 | 0.213 | 0.202 | 0.193 | 0.209 |
| ICU      | Post-ICU  | Large  | 0.555 | 0.542 | 0.572 | 0.555 | 0.538 | 0.574 |
| ICU      | Post-ICU  | Medium | 0.529 | 0.495 | 0.568 | 0.529 | 0.487 | 0.572 |
| ICU      | Post-ICU  | Small  | 0.810 | 0.774 | 0.841 | 0.811 | 0.773 | 0.850 |
| ICU      | Death     | Large  | 0.445 | 0.428 | 0.458 | 0.445 | 0.426 | 0.462 |
| ICU      | Death     | Medium | 0.471 | 0.432 | 0.505 | 0.471 | 0.428 | 0.513 |
| ICU      | Death     | Small  | 0.190 | 0.159 | 0.226 | 0.189 | 0.150 | 0.227 |
| Post-ICU | Discharge | Large  | 0.897 | 0.883 | 0.911 | 0.897 | 0.883 | 0.910 |
| Post-ICU | Discharge | Medium | 0.900 | 0.852 | 0.924 | 0.901 | 0.869 | 0.932 |
| Post-ICU | Discharge | Small  | 0.930 | 0.895 | 0.952 | 0.930 | 0.888 | 0.960 |
| Post-ICU | Death     | Large  | 0.103 | 0.089 | 0.117 | 0.103 | 0.090 | 0.117 |
| Post-ICU | Death     | Medium | 0.100 | 0.076 | 0.148 | 0.099 | 0.068 | 0.131 |
| Post-ICU | Death     | Small  | 0.070 | 0.048 | 0.105 | 0.070 | 0.040 | 0.112 |

Table A.18: Estimated probabilities (95% confidence intervals) of next events, given current state, by hospital bed capacity and missing outcome assumption: (a) censoring at 1 day after last observed event; (b) ignoring missing outcomes.

Estimated probabilities of final events are given in Table A.19:

| Final Event | Hospital Bed Capacity | CENSORING       |       |       | MISSING         |       |       |
|-------------|-----------------------|-----------------|-------|-------|-----------------|-------|-------|
|             |                       | Pr(Final Event) | Lower | Upper | Pr(Final Event) | Lower | Upper |
| Death       | Large                 | 0.284           | 0.279 | 0.289 | 0.283           | 0.277 | 0.288 |
| Death       | Medium                | 0.302           | 0.290 | 0.315 | 0.302           | 0.292 | 0.313 |
| Death       | Small                 | 0.214           | 0.206 | 0.223 | 0.214           | 0.205 | 0.223 |

|           |        |       |       |       |       |       |       |
|-----------|--------|-------|-------|-------|-------|-------|-------|
| Discharge | Large  | 0.716 | 0.711 | 0.721 | 0.717 | 0.712 | 0.723 |
| Discharge | Medium | 0.698 | 0.685 | 0.710 | 0.698 | 0.687 | 0.708 |
| Discharge | Small  | 0.786 | 0.777 | 0.794 | 0.786 | 0.777 | 0.795 |

Table A.19: Estimated probabilities (95% confidence intervals) of final events, given current state (hospital-fatality risks and complement), by hospital bed capacity and missing outcome assumption: (a) censoring at 1 day after last observed event; (b) ignoring missing outcomes.

Estimated times to next events, under the censoring assumption only, are given in Table A.20:

| From     | Next Event | Hospital Bed Capacity | Mean | 95% CI of Mean |      | Median | 95% CI of Median |      | 25%-ile |     | 95% CI of 25%-ile |      | 75%-ile |      | 95% CI of 75%-ile |  |
|----------|------------|-----------------------|------|----------------|------|--------|------------------|------|---------|-----|-------------------|------|---------|------|-------------------|--|
|          |            |                       |      |                |      |        |                  |      |         |     |                   |      |         |      |                   |  |
| Hospital | Discharge  | Large                 | 15.4 | 15.2           | 15.6 | 10.0   | 9.8              | 10.1 | 3.5     | 3.4 | 3.5               | 21.7 | 21.3    | 22.0 |                   |  |
|          | Discharge  | Medium                | 17.9 | 17.4           | 18.5 | 11.6   | 11.2             | 12.1 | 4.0     | 3.9 | 4.2               | 25.4 | 24.3    | 26.3 |                   |  |
|          | Discharge  | Small                 | 24.2 | 23.3           | 24.8 | 15.7   | 15.2             | 16.1 | 5.5     | 5.3 | 5.6               | 34.3 | 33.1    | 35.1 |                   |  |
|          | ICU        | Large                 | 6.4  | 5.8            | 6.9  | 2.5    | 2.4              | 2.7  | 1.1     | 1.1 | 1.2               | 6.0  | 5.7     | 6.3  |                   |  |
|          | ICU        | Medium                | 6.5  | 5.8            | 7.7  | 2.6    | 2.3              | 2.8  | 1.1     | 1.0 | 1.2               | 6.1  | 5.5     | 6.8  |                   |  |
|          | ICU        | Small                 | 6.3  | 5.4            | 7.1  | 2.5    | 2.3              | 2.7  | 1.1     | 1.0 | 1.2               | 5.9  | 5.4     | 6.5  |                   |  |
|          | Death      | Large                 | 9.2  | 8.9            | 9.5  | 5.8    | 5.7              | 5.9  | 2.7     | 2.7 | 2.8               | 11.5 | 11.4    | 11.8 |                   |  |
|          | Death      | Medium                | 9.8  | 9.2            | 10.1 | 6.2    | 5.8              | 6.5  | 2.9     | 2.8 | 3.1               | 12.3 | 11.6    | 13.0 |                   |  |
|          | Death      | Small                 | 11.1 | 10.4           | 11.6 | 7.0    | 6.7              | 7.4  | 3.3     | 3.2 | 3.5               | 14.0 | 13.4    | 14.8 |                   |  |
| ICU      | Post-ICU   | Large                 | 16.9 | 16.2           | 17.4 | 12.8   | 12.2             | 13.5 | 6.1     | 5.7 | 6.5               | 23.3 | 22.2    | 24.6 |                   |  |
|          | Post-ICU   | Medium                | 16.9 | 15.4           | 19.1 | 12.7   | 11.4             | 14.3 | 6.1     | 5.4 | 6.7               | 23.3 | 20.9    | 26.3 |                   |  |
|          | Post-ICU   | Small                 | 15.5 | 13.5           | 16.7 | 11.7   | 10.6             | 12.9 | 5.6     | 5.0 | 6.2               | 21.4 | 19.4    | 23.4 |                   |  |
|          | Death      | Large                 | 12.4 | 11.8           | 12.9 | 9.8    | 9.4              | 10.2 | 5.0     | 4.8 | 5.3               | 17.0 | 16.3    | 17.7 |                   |  |
|          | Death      | Medium                | 11.1 | 10.2           | 12.3 | 8.7    | 7.8              | 9.9  | 4.5     | 4.0 | 5.1               | 15.2 | 13.5    | 17.1 |                   |  |
|          | Death      | Small                 | 12.9 | 10.5           | 15.2 | 10.2   | 8.6              | 12.1 | 5.2     | 4.4 | 6.2               | 17.7 | 15.1    | 20.9 |                   |  |

|          |           |        |      |      |      |      |      |      |      |      |      |      |      |      |
|----------|-----------|--------|------|------|------|------|------|------|------|------|------|------|------|------|
| Post-ICU | Discharge | Large  | 21.1 | 20.4 | 21.8 | 17.9 | 17.3 | 18.5 | 10.5 | 10.0 | 10.8 | 28.3 | 27.4 | 29.2 |
|          | Discharge | Medium | 24.9 | 22.6 | 26.7 | 21.1 | 19.4 | 22.8 | 12.4 | 11.4 | 13.4 | 33.4 | 30.3 | 36.2 |
|          | Discharge | Small  | 26.3 | 23.6 | 28.3 | 22.3 | 20.6 | 24.2 | 13.1 | 11.9 | 14.2 | 35.3 | 32.6 | 38.6 |
|          | Death     | Large  | 13.1 | 11.4 | 18.7 | 8.5  | 7.7  | 9.8  | 4.9  | 4.4  | 5.7  | 15.3 | 13.7 | 17.9 |
|          | Death     | Medium | 13.9 | 10.9 | 23.0 | 9.0  | 6.5  | 14.1 | 5.2  | 3.7  | 8.2  | 16.1 | 11.4 | 24.1 |
|          | Death     | Small  | 11.7 | 7.7  | 21.3 | 7.6  | 5.7  | 11.8 | 4.4  | 3.2  | 6.8  | 13.6 | 10.2 | 20.4 |

Table A.20: Summaries of times from current state to next event, conditional on experiencing that next event, by hospital bed capacity, assuming missing outcomes are censoring at 1 day after last observed event.

Estimated times to final events (total length of stay in hospital), by pathway through hospital, are given in Table A.21, under the censoring assumption only:

| Outcome   | Pathway                     | Hospital<br>Bed<br>Capacity | Mean | 95% CI of<br>Mean |      | Median | 95% CI of<br>Median |      | 25%-ile | 95% CI of<br>25%-ile |      | 75%-ile | 95% CI of<br>75%-ile |      |
|-----------|-----------------------------|-----------------------------|------|-------------------|------|--------|---------------------|------|---------|----------------------|------|---------|----------------------|------|
|           |                             |                             |      |                   |      |        |                     |      |         |                      |      |         |                      |      |
| Death     | Hospital-Death              | Large                       | 9.2  | 8.9               | 9.4  | 5.8    | 5.6                 | 6.0  | 2.8     | 2.6                  | 2.8  | 11.3    | 11.2                 | 11.9 |
| Death     | Hospital-Death              | Medium                      | 9.8  | 9.3               | 10.3 | 6.0    | 5.9                 | 6.5  | 2.9     | 2.8                  | 3.2  | 12.0    | 11.8                 | 13.1 |
| Death     | Hospital-Death              | Small                       | 11.1 | 10.7              | 11.6 | 6.8    | 6.6                 | 7.5  | 3.3     | 3.2                  | 3.5  | 14.2    | 13.1                 | 15.0 |
| Death     | Hospital-ICU-Death          | Large                       | 18.8 | 18.2              | 19.6 | 14.7   | 14.2                | 15.2 | 8.5     | 8.2                  | 8.9  | 23.4    | 22.8                 | 24.5 |
| Death     | Hospital-ICU-Death          | Medium                      | 17.6 | 16.3              | 19.4 | 13.4   | 12.6                | 14.7 | 7.9     | 7.5                  | 8.6  | 21.8    | 20.7                 | 24.0 |
| Death     | Hospital-ICU-Death          | Small                       | 19.2 | 16.9              | 23.3 | 15.1   | 13.3                | 17.3 | 8.8     | 7.7                  | 10.1 | 24.4    | 21.2                 | 28.4 |
| Death     | Hospital-ICU-Post-ICU-Death | Large                       | 36.5 | 35.0              | 42.7 | 30.4   | 28.8                | 31.5 | 19.6    | 18.5                 | 20.6 | 45.4    | 43.6                 | 48.5 |
| Death     | Hospital-ICU-Post-ICU-Death | Medium                      | 37.3 | 32.5              | 46.7 | 31.0   | 26.4                | 36.6 | 20.5    | 17.1                 | 24.0 | 47.2    | 40.1                 | 54.7 |
| Death     | Hospital-ICU-Post-ICU-Death | Small                       | 33.5 | 30.1              | 44.3 | 27.7   | 25.4                | 32.6 | 17.8    | 16.4                 | 21.2 | 41.4    | 38.5                 | 50.0 |
| Discharge | Hospital-Discharge          | Large                       | 15.4 | 15.1              | 15.6 | 10.1   | 9.6                 | 10.3 | 3.5     | 3.3                  | 3.7  | 21.8    | 21.1                 | 22.3 |
| Discharge | Hospital-Discharge          | Medium                      | 17.9 | 17.3              | 18.4 | 11.9   | 11.2                | 12.2 | 4.1     | 3.8                  | 4.3  | 25.7    | 24.7                 | 26.7 |
| Discharge | Hospital-Discharge          | Small                       | 24.2 | 23.6              | 24.9 | 15.5   | 15.1                | 16.5 | 5.6     | 5.1                  | 5.9  | 34.5    | 33.0                 | 35.8 |

|           |                                 |        |      |      |      |      |      |      |      |      |      |      |      |      |
|-----------|---------------------------------|--------|------|------|------|------|------|------|------|------|------|------|------|------|
| Discharge | Hospital-ICU-Post-ICU-Discharge | Large  | 44.4 | 43.0 | 45.4 | 39.4 | 38.5 | 40.3 | 27.1 | 26.3 | 27.8 | 55.8 | 54.3 | 57.1 |
| Discharge | Hospital-ICU-Post-ICU-Discharge | Medium | 48.3 | 46.1 | 51.1 | 43.3 | 40.2 | 45.9 | 29.8 | 27.5 | 31.5 | 61.4 | 56.7 | 64.9 |
| Discharge | Hospital-ICU-Post-ICU-Discharge | Small  | 48.1 | 45.5 | 51.2 | 43.0 | 40.7 | 45.6 | 29.5 | 27.9 | 31.4 | 60.8 | 57.3 | 63.7 |
| Death     | Averaged over pathways          | Large  | 11.3 | 11.2 | 11.6 | 7.0  | 6.6  | 7.3  | 3.3  | 3.0  | 3.4  | 14.5 | 13.5 | 15.2 |
| Death     | Averaged over pathways          | Medium | 11.3 | 10.8 | 11.9 | 7.5  | 6.7  | 7.6  | 3.4  | 3.1  | 3.5  | 14.8 | 13.3 | 15.5 |
| Death     | Averaged over pathways          | Small  | 11.8 | 11.2 | 12.4 | 7.6  | 6.8  | 8.0  | 3.3  | 3.2  | 3.8  | 15.3 | 13.9 | 16.0 |
| Discharge | Averaged over pathways          | Large  | 17.4 | 17.2 | 17.7 | 11.1 | 10.8 | 11.7 | 3.8  | 3.6  | 4.1  | 24.9 | 24.0 | 25.4 |
| Discharge | Averaged over pathways          | Medium | 19.7 | 19.1 | 20.5 | 13.0 | 12.3 | 13.3 | 4.5  | 4.1  | 4.7  | 28.5 | 27.4 | 29.2 |
| Discharge | Averaged over pathways          | Small  | 25.4 | 24.9 | 26.2 | 16.6 | 16.0 | 17.8 | 5.7  | 5.4  | 6.3  | 36.6 | 34.6 | 38.0 |

Table A.21 Summaries of times from hospital admission to final events (total length of stay), by hospital bed capacity and pathway through hospital, conditional on experiencing that final event and assuming missing outcomes are censoring at 1 day after last observed event.

Estimated total lengths of stay in hospital, by hospital bed capacity and averaged over pathways and final outcomes, are given in Table A.22, under the censoring assumption only:

| Hospital Bed Capacity | Mean | 95% CI of Mean |      | Median | 95% CI of Median |      | 25%-ile | 95% CI of 25%-ile |     | 75%-ile | 95% CI of 75%-ile |      |
|-----------------------|------|----------------|------|--------|------------------|------|---------|-------------------|-----|---------|-------------------|------|
| Large                 | 15.7 | 15.5           | 15.9 | 9.7    | 9.4              | 9.9  | 3.6     | 3.5               | 3.7 | 21.3    | 21.1              | 22.1 |
| Medium                | 17.2 | 16.8           | 17.7 | 10.4   | 10.1             | 10.7 | 3.8     | 3.7               | 4.1 | 23.2    | 22.8              | 24.5 |
| Small                 | 22.5 | 21.8           | 23.0 | 13.7   | 13.2             | 14.2 | 4.9     | 4.8               | 5.2 | 32.0    | 30.7              | 32.6 |

Table A.22: Summaries of lengths of stay in hospital (total time in hospital), by hospital bed capacity and averaged over pathways and final outcomes, assuming missing outcomes are censoring at 1 day after last observed event.

### A.3.4 Model regressed on both month of admission and hospital bed capacity

The effect of hospital bed capacity on probabilities of next events from an admitting hospital ward and from ICU remains significant once adjusted for month of admission, while its effect on transitions from post-ICU remains non-significant. The predicted

probabilities by hospital bed capacity and month of admission are shown in Figure A.6: probabilities of severe events (ICU admission, death) decrease with calendar month and are smaller in the smallest hospitals than in others; while the corresponding probabilities of discharge and transfer to a post-ICU ward increase with time and are largest in the smallest hospitals. Note that the absolute differences between the probabilities by hospital size also decrease with calendar month.

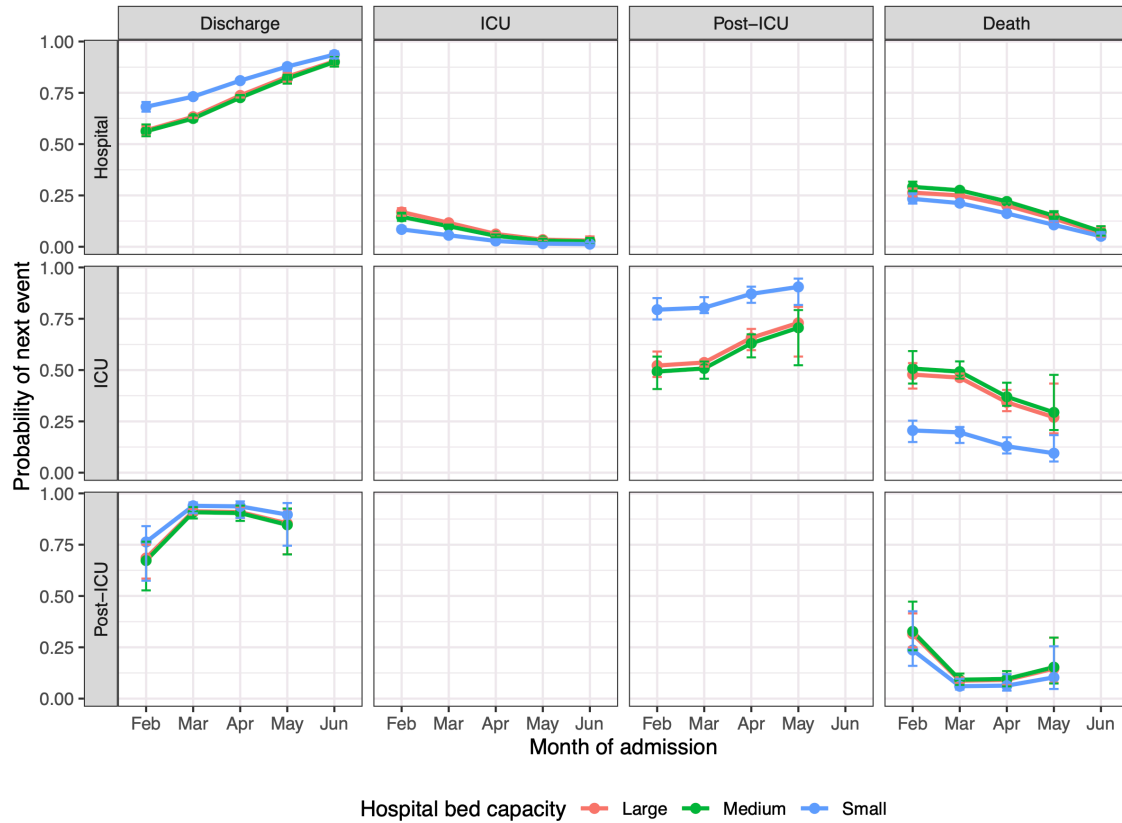

Figure A.6: Predicted probabilities of moving to the next event, by current state (rows), next event (columns), month of admission (x-axis) and hospital bed capacity (colours).

The state-specific fatality risks, weighted by the probabilities of each pathway through hospital, result in a hospital-fatality risk that decreases with calendar month and is smallest in the smallest hospitals (Figure A.7).

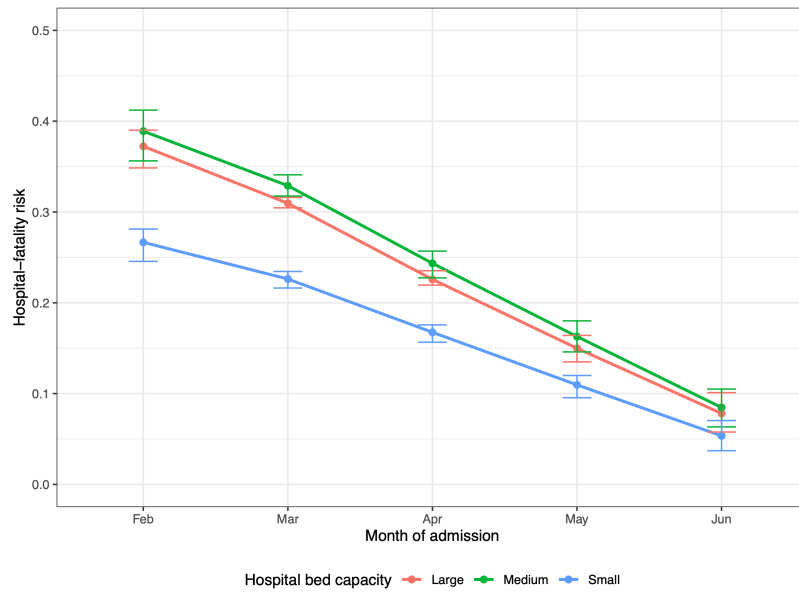

Figure A.7: Hospital-fatality risk, averaged over all pathways through hospital, by month of admission (x-axis) and hospital bed capacity (colours).

Adjusted for month of admission, the effect of hospital bed capacity is similar to the unadjusted effect: LoS among survivors decreases with increasing bed capacity, whereas there is little effect on times to death, regardless of which hospital ward the patient is in (Figure A.8). Month of admission has significant effects, with LoS in each stage of hospital decreasing over time for survivors (Figure A.8).

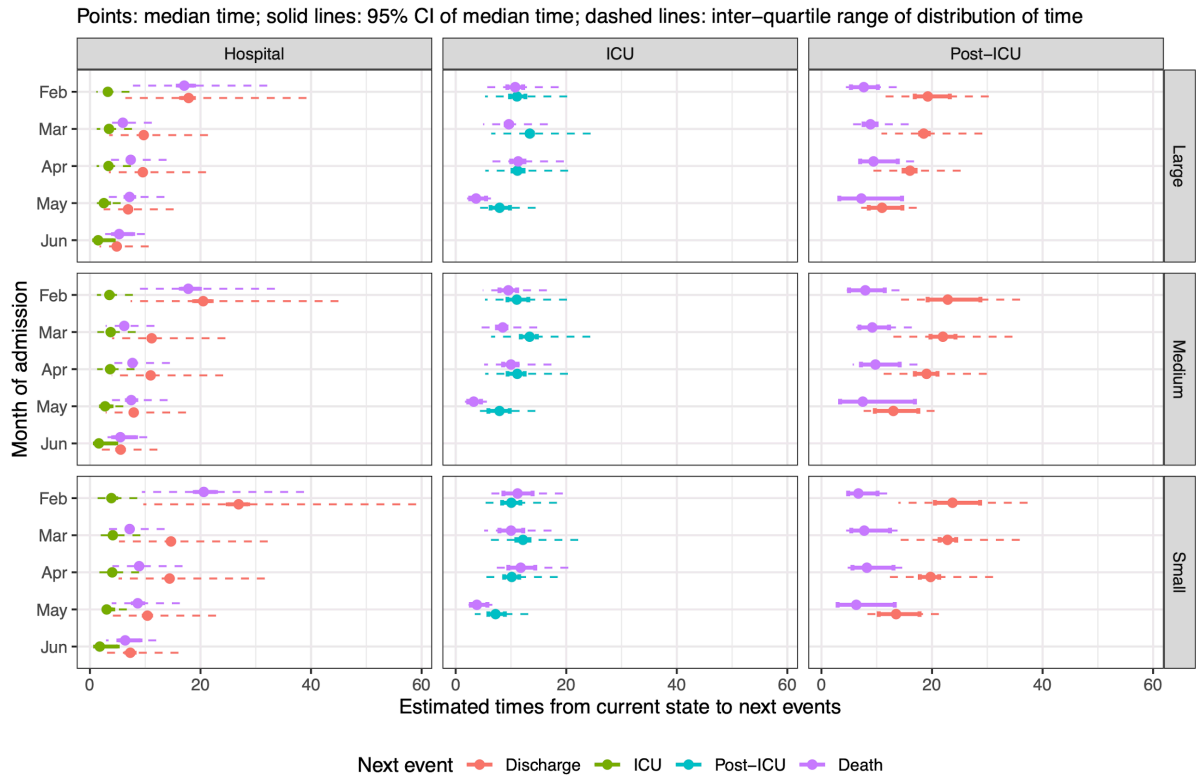

Figure A.8: Summaries of distributions of lengths of stay in hospital, by current state (columns), next event (colours), month of admission (y-axis) and hospital bed capacity (rows). The 95% CI of the median times (solid lines) represent uncertainty in the estimate, whereas the inter-quartile range of the distribution (dashed lines) represents heterogeneity in the population.

Parameter estimates from this model are given in Table A.23:

| From     | To        | Distribution | Parameter       | Estimate |         | SE     |         | OR or ETR |         | Lower  |         | Upper  |         |
|----------|-----------|--------------|-----------------|----------|---------|--------|---------|-----------|---------|--------|---------|--------|---------|
|          |           |              |                 | Censor   | Missing | Censor | Missing | Censor    | Missing | Censor | Missing | Censor | Missing |
| Hospital | Discharge |              | $\pi_{1,2}$     | 0.6332   | 0.6330  | 0.0261 | 0.0260  |           |         |        |         |        |         |
| Hospital | ICU       |              | $\pi_{1,3}$     | 0.1168   | 0.1170  | 0.0221 | 0.0221  |           |         |        |         |        |         |
| Hospital | Death     |              | $\pi_{1,5}$     | 0.2499   | 0.2501  | 0.0162 | 0.0162  |           |         |        |         |        |         |
| Hospital | Discharge |              | $\pi_{1,2}$ Feb | 0.4808   | 0.4628  | 0.0767 | 0.0770  | 1.6174    | 1.5885  | 1.3916 | 1.3659  | 1.8798 | 1.8474  |
| Hospital | Discharge |              | $\pi_{1,2}$ Apr | -0.7842  | -0.7873 | 0.0509 | 0.0510  | 0.4565    | 0.4551  | 0.4131 | 0.4118  | 0.5044 | 0.5029  |
| Hospital | Discharge |              | $\pi_{1,2}$ May | -1.4867  | -1.5563 | 0.1476 | 0.1523  | 0.2261    | 0.2109  | 0.1693 | 0.1565  | 0.3020 | 0.2843  |



|          |           |       |                   |         |         |        |        |        |        |        |        |        |        |
|----------|-----------|-------|-------------------|---------|---------|--------|--------|--------|--------|--------|--------|--------|--------|
| Hospital | Discharge |       | $\pi_{1,2}$ Jun   | -1.7283 | -1.7360 | 0.2802 | 0.2828 | 0.1776 | 0.1762 | 0.1025 | 0.1012 | 0.3075 | 0.3067 |
| Hospital | Discharge |       | $\pi_{1,2}$ Med.  | -0.1422 | -0.1426 | 0.0538 | 0.0538 | 0.8675 | 0.8671 | 0.7806 | 0.7803 | 0.9640 | 0.9636 |
| Hospital | Discharge |       | $\pi_{1,2}$ Small | -0.8785 | -0.8781 | 0.0599 | 0.0599 | 0.4154 | 0.4156 | 0.3694 | 0.3695 | 0.4672 | 0.4674 |
| Hospital | ICU       |       | $\pi_{1,3}$ Feb   | 0.1636  | 0.1566  | 0.0608 | 0.0608 | 1.1777 | 1.1695 | 1.0454 | 1.0381 | 1.3267 | 1.3176 |
| Hospital | ICU       |       | $\pi_{1,3}$ Apr   | -0.3707 | -0.3728 | 0.0305 | 0.0306 | 0.6903 | 0.6888 | 0.6502 | 0.6487 | 0.7328 | 0.7313 |
| Hospital | ICU       |       | $\pi_{1,3}$ May   | -0.8710 | -0.8699 | 0.0768 | 0.0766 | 0.4185 | 0.4190 | 0.3601 | 0.3606 | 0.4865 | 0.4869 |
| Hospital | ICU       |       | $\pi_{1,3}$ Jun   | -1.6725 | -1.6956 | 0.1882 | 0.1895 | 0.1878 | 0.1835 | 0.1299 | 0.1266 | 0.2715 | 0.2660 |
| Hospital | ICU       |       | $\pi_{1,3}$ Med.  | 0.1088  | 0.1071  | 0.0352 | 0.0353 | 1.1150 | 1.1131 | 1.0405 | 1.0388 | 1.1947 | 1.1927 |
| Hospital | ICU       |       | $\pi_{1,3}$ Small | -0.3066 | -0.3099 | 0.0344 | 0.0344 | 0.7359 | 0.7335 | 0.6879 | 0.6856 | 0.7873 | 0.7847 |
| Hospital | Discharge | gamma | shape             | 0.8093  | 0.8081  | 0.0074 | 0.0074 |        |        |        |        |        |        |
| Hospital | Discharge | gamma | rate              | 0.0524  | 0.0522  | 0.0120 | 0.0120 |        |        |        |        |        |        |
| Hospital | Discharge | gamma | $T_{1,2}$ Feb     | -0.6069 | -0.6059 | 0.0370 | 0.0370 | 0.5451 | 0.5456 | 0.5070 | 0.5074 | 0.5860 | 0.5866 |
| Hospital | Discharge | gamma | $T_{1,2}$ Apr     | 0.0167  | 0.0193  | 0.0161 | 0.0161 | 1.0168 | 1.0195 | 0.9853 | 0.9879 | 1.0494 | 1.0522 |
| Hospital | Discharge | gamma | $T_{1,2}$ May     | 0.3434  | 0.3552  | 0.0325 | 0.0324 | 1.4097 | 1.4265 | 1.3227 | 1.3387 | 1.5025 | 1.5200 |
| Hospital | Discharge | gamma | $T_{1,2}$ Jun     | 0.6973  | 0.7179  | 0.0556 | 0.0553 | 2.0083 | 2.0501 | 1.8010 | 1.8394 | 2.2394 | 2.2850 |
| Hospital | Discharge | gamma | $T_{1,2}$ Med.    | -0.1377 | -0.1362 | 0.0205 | 0.0205 | 0.8713 | 0.8727 | 0.8369 | 0.8382 | 0.9071 | 0.9085 |
| Hospital | Discharge | gamma | $T_{1,2}$ Small   | -0.4097 | -0.4088 | 0.0180 | 0.0180 | 0.6638 | 0.6644 | 0.6408 | 0.6414 | 0.6877 | 0.6884 |
| Hospital | ICU       | gamma | shape             | 0.8011  | 0.8031  | 0.0201 | 0.0200 |        |        |        |        |        |        |
| Hospital | ICU       | gamma | rate              | 0.1454  | 0.1455  | 0.0304 | 0.0304 |        |        |        |        |        |        |
| Hospital | ICU       | gamma | $T_{1,3}$ Feb     | 0.0635  | 0.0648  | 0.0769 | 0.0769 | 1.0656 | 1.0669 | 0.9164 | 0.9177 | 1.2390 | 1.2404 |
| Hospital | ICU       | gamma | $T_{1,3}$ Apr     | 0.0268  | 0.0273  | 0.0544 | 0.0544 | 1.0272 | 1.0277 | 0.9232 | 0.9237 | 1.1429 | 1.1434 |
| Hospital | ICU       | gamma | $T_{1,3}$ May     | 0.3148  | 0.3265  | 0.1669 | 0.1660 | 1.3700 | 1.3861 | 0.9877 | 1.0011 | 1.9002 | 1.9192 |
| Hospital | ICU       | gamma | $T_{1,3}$ Jun     | 0.8443  | 1.0276  | 0.4786 | 0.4445 | 2.3263 | 2.7944 | 0.9105 | 1.1692 | 5.9439 | 6.6786 |
| Hospital | ICU       | gamma | $T_{1,3}$ Med.    | -0.0835 | -0.0837 | 0.0563 | 0.0563 | 0.9199 | 0.9197 | 0.8238 | 0.8237 | 1.0272 | 1.0270 |
| Hospital | ICU       | gamma | $T_{1,3}$ Small   | -0.1811 | -0.1794 | 0.0642 | 0.0641 | 0.8344 | 0.8358 | 0.7358 | 0.7371 | 0.9462 | 0.9477 |
| Hospital | Death     | gamma | shape             | 1.1773  | 1.1770  | 0.0131 | 0.0131 |        |        |        |        |        |        |

|          |          |       |                    |         |         |        |        |        |        |        |        |        |        |
|----------|----------|-------|--------------------|---------|---------|--------|--------|--------|--------|--------|--------|--------|--------|
| Hospital | Death    | gamma | rate               | 0.1455  | 0.1456  | 0.0182 | 0.0182 |        |        |        |        |        |        |
| Hospital | Death    | gamma | $T_{1,5}$ Feb      | -1.0534 | -1.0640 | 0.0469 | 0.0471 | 0.3487 | 0.3451 | 0.3181 | 0.3146 | 0.3823 | 0.3785 |
| Hospital | Death    | gamma | $T_{1,5}$ Apr      | -0.2149 | -0.2161 | 0.0248 | 0.0248 | 0.8066 | 0.8056 | 0.7684 | 0.7675 | 0.8467 | 0.8457 |
| Hospital | Death    | gamma | $T_{1,5}$ May      | -0.1857 | -0.1847 | 0.0654 | 0.0653 | 0.8305 | 0.8313 | 0.7306 | 0.7314 | 0.9441 | 0.9449 |
| Hospital | Death    | gamma | $T_{1,5}$ Jun      | 0.1192  | 0.1266  | 0.1688 | 0.1686 | 1.1266 | 1.1350 | 0.8092 | 0.8155 | 1.5686 | 1.5796 |
| Hospital | Death    | gamma | $T_{1,5}$ Med.     | -0.0421 | -0.0425 | 0.0275 | 0.0275 | 0.9588 | 0.9584 | 0.9085 | 0.9081 | 1.0119 | 1.0115 |
| Hospital | Death    | gamma | $T_{1,5}$ Small    | -0.1884 | -0.1885 | 0.0280 | 0.0280 | 0.8283 | 0.8282 | 0.7841 | 0.7840 | 0.8750 | 0.8750 |
| ICU      | Post-ICU |       | $\pi_{3,4}$        | 0.5369  | 0.5369  | 0.0413 | 0.0413 |        |        |        |        |        |        |
| ICU      | Death    |       | $\pi_{3,5}$        | 0.4631  | 0.4631  | 0.0413 | 0.0413 |        |        |        |        |        |        |
| ICU      | Post-ICU |       | $\pi_{3,4}$ Feb    | 0.0598  | 0.0602  | 0.1396 | 0.1396 | 1.0616 | 1.0620 | 0.8075 | 0.8078 | 1.3957 | 1.3963 |
| ICU      | Post-ICU |       | $\pi_{3,4}$ Apr    | -0.5024 | -0.5019 | 0.1045 | 0.1044 | 0.6051 | 0.6054 | 0.4931 | 0.4933 | 0.7425 | 0.7429 |
| ICU      | Post-ICU |       | $\pi_{3,4}$ MayJun | -0.8463 | -0.8384 | 0.3006 | 0.3001 | 0.4290 | 0.4324 | 0.2380 | 0.2401 | 0.7733 | 0.7786 |
| ICU      | Post-ICU |       | $\pi_{3,4}$ Med.   | 0.1170  | 0.1167  | 0.1015 | 0.1015 | 1.1241 | 1.1238 | 0.9212 | 0.9210 | 1.3717 | 1.3713 |
| ICU      | Post-ICU |       | $\pi_{3,4}$ Small  | -1.2624 | -1.2634 | 0.1445 | 0.1445 | 0.2830 | 0.2827 | 0.2132 | 0.2130 | 0.3756 | 0.3753 |
| ICU      | Post-ICU | gamma | shape              | 1.2917  | 1.2914  | 0.0276 | 0.0276 |        |        |        |        |        |        |
| ICU      | Post-ICU | gamma | rate               | 0.0729  | 0.0729  | 0.0368 | 0.0368 |        |        |        |        |        |        |
| ICU      | Post-ICU | gamma | $T_{3,4}$ Feb      | 0.1906  | 0.1895  | 0.0822 | 0.0822 | 1.2100 | 1.2086 | 1.0299 | 1.0287 | 1.4215 | 1.4200 |
| ICU      | Post-ICU | gamma | $T_{3,4}$ Apr      | 0.1827  | 0.1821  | 0.0533 | 0.0534 | 1.2004 | 1.1997 | 1.0812 | 1.0806 | 1.3327 | 1.3320 |
| ICU      | Post-ICU | gamma | $T_{3,4}$ May      | 0.5237  | 0.5251  | 0.1357 | 0.1356 | 1.6882 | 1.6906 | 1.2939 | 1.2960 | 2.2027 | 2.2055 |
| ICU      | Post-ICU | gamma | $T_{3,4}$ Med.     | 0.0025  | 0.0025  | 0.0609 | 0.0609 | 1.0025 | 1.0025 | 0.8898 | 0.8898 | 1.1294 | 1.1295 |
| ICU      | Post-ICU | gamma | $T_{3,4}$ Small    | 0.0965  | 0.0962  | 0.0574 | 0.0574 | 1.1013 | 1.1010 | 0.9841 | 0.9837 | 1.2326 | 1.2322 |
| ICU      | Death    | gamma | shape              | 1.5139  | 1.5122  | 0.0325 | 0.0325 |        |        |        |        |        |        |
| ICU      | Death    | gamma | rate               | 0.1244  | 0.1243  | 0.0408 | 0.0408 |        |        |        |        |        |        |
| ICU      | Death    | gamma | $T_{3,5}$ Feb      | -0.1119 | -0.1112 | 0.0828 | 0.0828 | 0.8942 | 0.8948 | 0.7602 | 0.7607 | 1.0518 | 1.0526 |
| ICU      | Death    | gamma | $T_{3,5}$ Apr      | -0.1611 | -0.1613 | 0.0682 | 0.0683 | 0.8512 | 0.8510 | 0.7447 | 0.7445 | 0.9729 | 0.9729 |
| ICU      | Death    | gamma | $T_{3,5}$ May      | 0.9610  | 0.9612  | 0.2112 | 0.2113 | 2.6143 | 2.6149 | 1.7283 | 1.7282 | 3.9547 | 3.9564 |

|          |           |          |                    |         |         |        |        |        |        |        |        |        |        |
|----------|-----------|----------|--------------------|---------|---------|--------|--------|--------|--------|--------|--------|--------|--------|
| ICU      | Death     | gamma    | $T_{3,5}$ Med.     | 0.1220  | 0.1212  | 0.0601 | 0.0601 | 1.1298 | 1.1289 | 1.0043 | 1.0033 | 1.2710 | 1.2701 |
| ICU      | Death     | gamma    | $T_{3,5}$ Small    | -0.0397 | -0.0397 | 0.1042 | 0.1043 | 0.9611 | 0.9610 | 0.7835 | 0.7834 | 1.1789 | 1.1790 |
| Post-ICU | Discharge |          | $\pi_{4,2}$        | 0.9126  | 0.9127  | 0.1062 | 0.1062 |        |        |        |        |        |        |
| Post-ICU | Death     |          | $\pi_{4,5}$        | 0.0874  | 0.0873  | 0.1062 | 0.1062 |        |        |        |        |        |        |
| Post-ICU | Discharge |          | $\pi_{4,2}$ Feb    | 1.5695  | 1.5595  | 0.2405 | 0.2409 | 4.8044 | 4.7564 | 2.9983 | 2.9666 | 7.6982 | 7.6261 |
| Post-ICU | Discharge |          | $\pi_{4,2}$ Apr    | 0.0461  | 0.0414  | 0.2307 | 0.2310 | 1.0472 | 1.0423 | 0.6663 | 0.6628 | 1.6460 | 1.6391 |
| Post-ICU | Discharge |          | $\pi_{4,2}$ MayJun | 0.5809  | 0.6033  | 0.5038 | 0.4999 | 1.7877 | 1.8281 | 0.6659 | 0.6862 | 4.7992 | 4.8701 |
| Post-ICU | Discharge |          | $\pi_{4,2}$ Med.   | 0.0568  | 0.0593  | 0.2496 | 0.2495 | 1.0585 | 1.0611 | 0.6489 | 0.6507 | 1.7264 | 1.7303 |
| Post-ICU | Discharge |          | $\pi_{4,2}$ Small  | -0.3945 | -0.3839 | 0.2781 | 0.2772 | 0.6740 | 0.6812 | 0.3908 | 0.3957 | 1.1624 | 1.1727 |
| Post-ICU | Discharge | gengamma | $\mu_{4,2}$        | 3.0839  | 3.0851  | 0.0298 | 0.0298 |        |        |        |        |        |        |
| Post-ICU | Discharge | gengamma | $\sigma_{4,2}$     | 0.6779  | 0.6779  | 0.0204 | 0.0204 |        |        |        |        |        |        |
| Post-ICU | Discharge | gengamma | $Q_{4,2}$          | 0.7002  | 0.7042  | 0.0557 | 0.0561 |        |        |        |        |        |        |
| Post-ICU | Discharge | gengamma | $T_{4,2}$ Feb      | 0.0391  | 0.0396  | 0.0846 | 0.0846 | 1.0399 | 1.0404 | 0.8810 | 0.8814 | 1.2275 | 1.2281 |
| Post-ICU | Discharge | gengamma | $T_{4,2}$ Apr      | -0.1444 | -0.1441 | 0.0465 | 0.0465 | 0.8655 | 0.8658 | 0.7901 | 0.7903 | 0.9481 | 0.9484 |
| Post-ICU | Discharge | gengamma | $T_{4,2}$ MayJun   | -0.5242 | -0.5239 | 0.1295 | 0.1296 | 0.5920 | 0.5922 | 0.4593 | 0.4594 | 0.7631 | 0.7635 |
| Post-ICU | Discharge | gengamma | $T_{4,2}$ Med.     | 0.1718  | 0.1715  | 0.0530 | 0.0530 | 1.1874 | 1.1870 | 1.0703 | 1.0699 | 1.3174 | 1.3169 |
| Post-ICU | Discharge | gengamma | $T_{4,2}$ Small    | 0.2091  | 0.2095  | 0.0509 | 0.0509 | 1.2325 | 1.2331 | 1.1155 | 1.1160 | 1.3618 | 1.3625 |
| Post-ICU | Death     | gengamma | $\mu_{4,5}$        | 2.1252  | 2.1163  | 0.1542 | 0.1549 |        |        |        |        |        |        |
| Post-ICU | Death     | gengamma | $\sigma_{4,5}$     | 0.8284  | 0.8279  | 0.0559 | 0.0565 |        |        |        |        |        |        |
| Post-ICU | Death     | gengamma | $Q_{4,5}$          | -0.2068 | -0.2275 | 0.2716 | 0.2736 |        |        |        |        |        |        |
| Post-ICU | Death     | gengamma | $T_{4,5}$ Feb      | -0.1477 | -0.1412 | 0.1737 | 0.1736 | 0.8627 | 0.8683 | 0.6138 | 0.6178 | 1.2126 | 1.2203 |
| Post-ICU | Death     | gengamma | $T_{4,5}$ Apr      | 0.0600  | 0.0539  | 0.1854 | 0.1855 | 1.0619 | 1.0554 | 0.7383 | 0.7336 | 1.5271 | 1.5183 |
| Post-ICU | Death     | gengamma | $T_{4,5}$ MayJun   | -0.2064 | -0.2059 | 0.3882 | 0.3886 | 0.8135 | 0.8139 | 0.3802 | 0.3800 | 1.7410 | 1.7433 |
| Post-ICU | Death     | gengamma | $T_{4,5}$ Med.     | 0.0355  | 0.0299  | 0.1948 | 0.1948 | 1.0361 | 1.0303 | 0.7073 | 0.7034 | 1.5178 | 1.5093 |
| Post-ICU | Death     | gengamma | $T_{4,5}$ Small    | -0.1366 | -0.1249 | 0.2244 | 0.2242 | 0.8723 | 0.8826 | 0.5619 | 0.5687 | 1.3541 | 1.3696 |

Table A.23: parameter estimates for the model regressed on month of admission and hospital bed capacity, by missing outcome

assumption: (a) censoring at 1 day after last observed event; (b) ignoring missing outcomes. OR refers to odds ratios for the

*probabilities of each transition in each month relative to March and in each hospital bed capacity relative to large hospitals. ETR refers to the expected time ratios for the times of each transition in each month relative to March and in each hospital bed capacity relative to large hospitals.*

Comparison of non-parametric and parametric cumulative incidence curves, under both the missing outcome assumptions, are shown in Figure A.9:

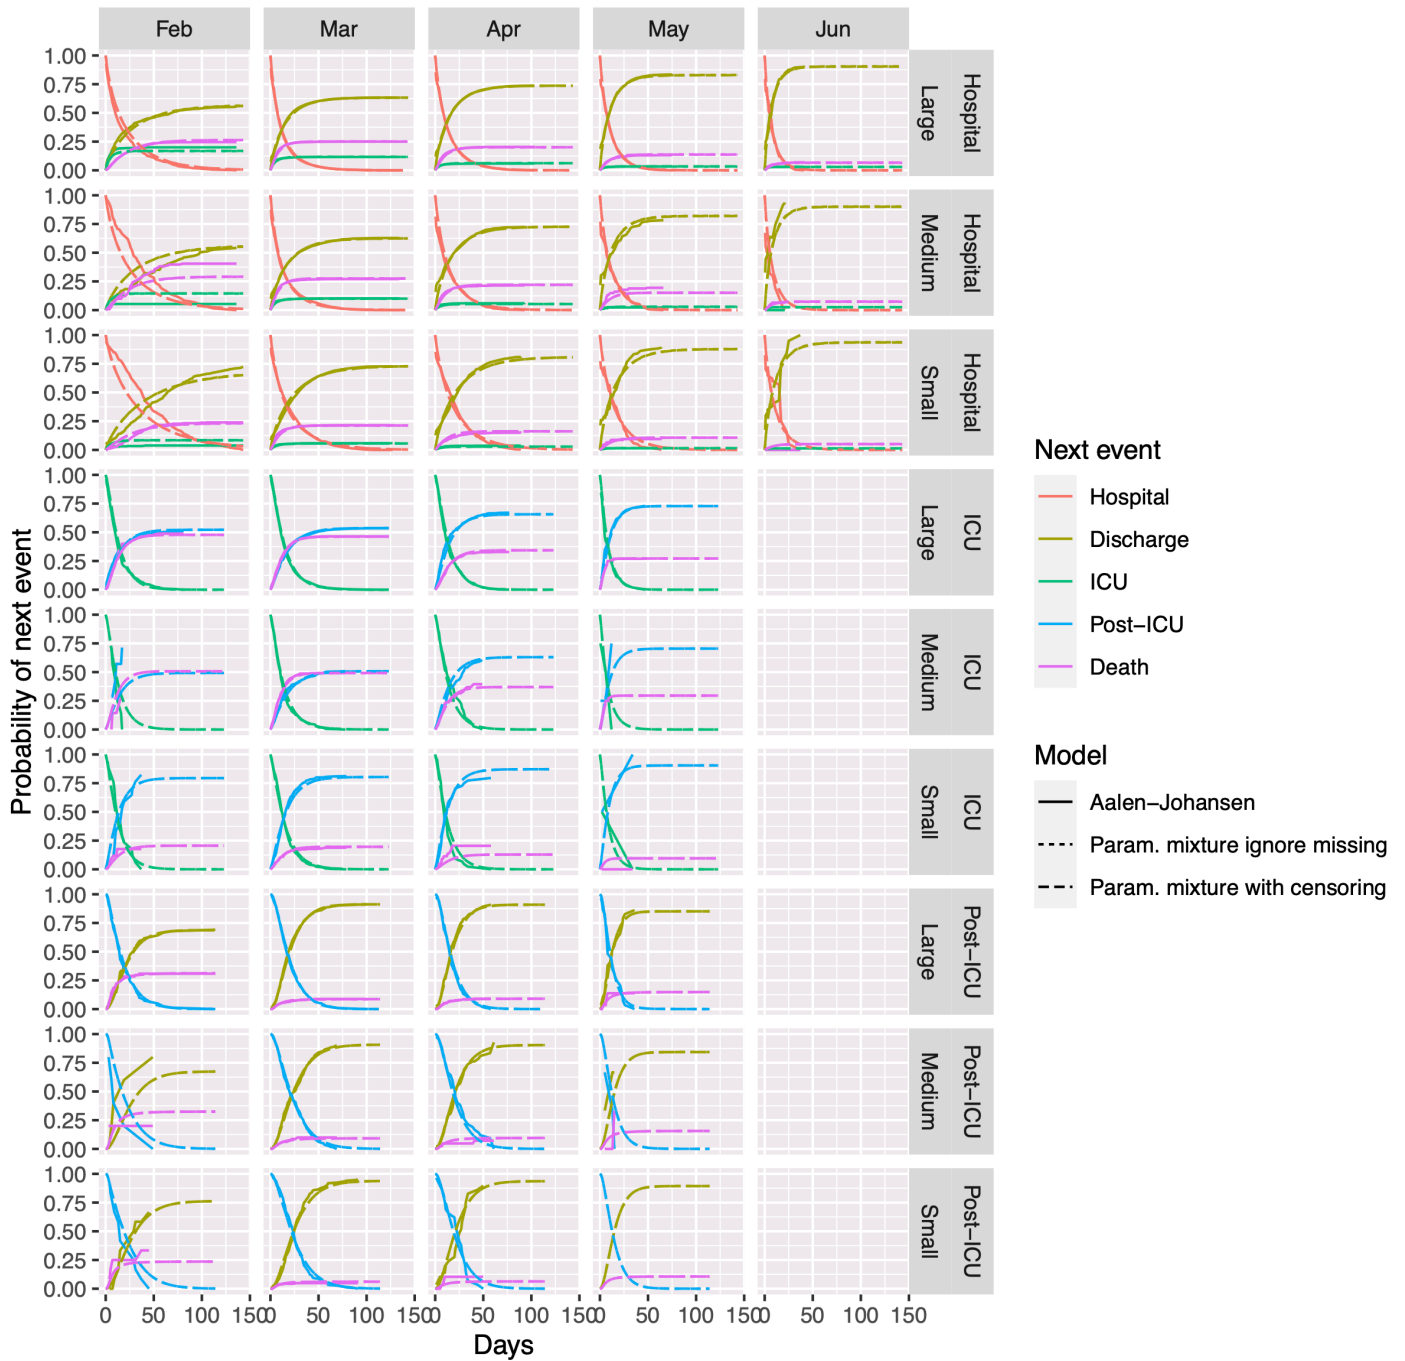

Figure A.9: Parametric versus non-parametric cumulative incidence estimates, by starting state (rows), next event (colours), month (columns), hospital bed capacity (rows) and model (line type). Note that for the ICU and post-ICU states, due to small sample sizes, May and June are combined and shown in the May column.

Estimated probabilities of next events are given in Table A.24:

| From     | Next Event | Hospital Bed<br>Capacity | Month | CENSORING      |       |       | MISSING        |       |       |
|----------|------------|--------------------------|-------|----------------|-------|-------|----------------|-------|-------|
|          |            |                          |       | Pr(Next Event) | Lower | Upper | Pr(Next Event) | Lower | Upper |
| Hospital | Discharge  | Large                    | Feb   | 0.567          | 0.551 | 0.584 | 0.570          | 0.537 | 0.590 |
| Hospital | Discharge  | Large                    | Mar   | 0.633          | 0.626 | 0.638 | 0.633          | 0.628 | 0.640 |
| Hospital | Discharge  | Large                    | Apr   | 0.737          | 0.728 | 0.746 | 0.737          | 0.728 | 0.745 |
| Hospital | Discharge  | Large                    | May   | 0.829          | 0.802 | 0.847 | 0.830          | 0.809 | 0.852 |
| Hospital | Discharge  | Large                    | Jun   | 0.903          | 0.874 | 0.930 | 0.905          | 0.872 | 0.923 |
| Hospital | Discharge  | Medium                   | Feb   | 0.563          | 0.542 | 0.586 | 0.565          | 0.537 | 0.588 |
| Hospital | Discharge  | Medium                   | Mar   | 0.625          | 0.606 | 0.638 | 0.625          | 0.612 | 0.638 |
| Hospital | Discharge  | Medium                   | Apr   | 0.726          | 0.709 | 0.741 | 0.727          | 0.711 | 0.742 |
| Hospital | Discharge  | Medium                   | May   | 0.819          | 0.792 | 0.839 | 0.821          | 0.796 | 0.842 |
| Hospital | Discharge  | Medium                   | Jun   | 0.900          | 0.871 | 0.929 | 0.902          | 0.869 | 0.922 |
| Hospital | Discharge  | Small                    | Feb   | 0.682          | 0.664 | 0.701 | 0.685          | 0.653 | 0.707 |
| Hospital | Discharge  | Small                    | Mar   | 0.731          | 0.723 | 0.742 | 0.732          | 0.721 | 0.740 |
| Hospital | Discharge  | Small                    | Apr   | 0.809          | 0.801 | 0.819 | 0.810          | 0.798 | 0.817 |
| Hospital | Discharge  | Small                    | May   | 0.878          | 0.859 | 0.892 | 0.879          | 0.861 | 0.894 |
| Hospital | Discharge  | Small                    | Jun   | 0.936          | 0.915 | 0.957 | 0.937          | 0.911 | 0.952 |
| Hospital | ICU        | Large                    | Feb   | 0.169          | 0.150 | 0.185 | 0.167          | 0.145 | 0.184 |
| Hospital | ICU        | Large                    | Mar   | 0.117          | 0.114 | 0.120 | 0.117          | 0.112 | 0.121 |
| Hospital | ICU        | Large                    | Apr   | 0.062          | 0.056 | 0.067 | 0.062          | 0.059 | 0.068 |
| Hospital | ICU        | Large                    | May   | 0.035          | 0.026 | 0.045 | 0.032          | 0.023 | 0.038 |
| Hospital | ICU        | Large                    | Jun   | 0.030          | 0.017 | 0.050 | 0.029          | 0.019 | 0.048 |
| Hospital | ICU        | Medium                   | Feb   | 0.146          | 0.120 | 0.160 | 0.144          | 0.121 | 0.164 |
| Hospital | ICU        | Medium                   | Mar   | 0.100          | 0.091 | 0.108 | 0.100          | 0.092 | 0.109 |
| Hospital | ICU        | Medium                   | Apr   | 0.053          | 0.046 | 0.059 | 0.053          | 0.049 | 0.060 |

|          |          |        |        |       |       |       |       |       |       |
|----------|----------|--------|--------|-------|-------|-------|-------|-------|-------|
| Hospital | ICU      | Medium | May    | 0.030 | 0.021 | 0.040 | 0.028 | 0.019 | 0.037 |
| Hospital | ICU      | Medium | Jun    | 0.026 | 0.015 | 0.043 | 0.025 | 0.016 | 0.043 |
| Hospital | ICU      | Small  | Feb    | 0.085 | 0.071 | 0.094 | 0.084 | 0.068 | 0.095 |
| Hospital | ICU      | Small  | Mar    | 0.056 | 0.050 | 0.061 | 0.056 | 0.049 | 0.061 |
| Hospital | ICU      | Small  | Apr    | 0.028 | 0.025 | 0.032 | 0.028 | 0.024 | 0.033 |
| Hospital | ICU      | Small  | May    | 0.015 | 0.011 | 0.021 | 0.014 | 0.010 | 0.018 |
| Hospital | ICU      | Small  | Jun    | 0.013 | 0.007 | 0.023 | 0.013 | 0.007 | 0.022 |
| Hospital | Death    | Large  | Feb    | 0.264 | 0.243 | 0.287 | 0.263 | 0.245 | 0.293 |
| Hospital | Death    | Large  | Mar    | 0.250 | 0.245 | 0.257 | 0.250 | 0.246 | 0.255 |
| Hospital | Death    | Large  | Apr    | 0.201 | 0.194 | 0.209 | 0.201 | 0.192 | 0.209 |
| Hospital | Death    | Large  | May    | 0.137 | 0.120 | 0.160 | 0.137 | 0.120 | 0.159 |
| Hospital | Death    | Large  | Jun    | 0.067 | 0.041 | 0.090 | 0.066 | 0.045 | 0.097 |
| Hospital | Death    | Medium | Feb    | 0.292 | 0.267 | 0.317 | 0.291 | 0.269 | 0.322 |
| Hospital | Death    | Medium | Mar    | 0.275 | 0.266 | 0.290 | 0.275 | 0.263 | 0.286 |
| Hospital | Death    | Medium | Apr    | 0.221 | 0.209 | 0.234 | 0.220 | 0.207 | 0.231 |
| Hospital | Death    | Medium | May    | 0.151 | 0.131 | 0.172 | 0.151 | 0.131 | 0.175 |
| Hospital | Death    | Medium | Jun    | 0.074 | 0.045 | 0.098 | 0.073 | 0.054 | 0.106 |
| Hospital | Death    | Small  | Feb    | 0.233 | 0.210 | 0.250 | 0.232 | 0.218 | 0.266 |
| Hospital | Death    | Small  | Mar    | 0.212 | 0.203 | 0.220 | 0.212 | 0.202 | 0.222 |
| Hospital | Death    | Small  | Apr    | 0.162 | 0.151 | 0.170 | 0.162 | 0.154 | 0.172 |
| Hospital | Death    | Small  | May    | 0.107 | 0.094 | 0.125 | 0.107 | 0.092 | 0.125 |
| Hospital | Death    | Small  | Jun    | 0.051 | 0.030 | 0.070 | 0.050 | 0.034 | 0.076 |
| ICU      | Post-ICU | Large  | Feb    | 0.522 | 0.460 | 0.587 | 0.522 | 0.451 | 0.587 |
| ICU      | Post-ICU | Large  | Mar    | 0.537 | 0.518 | 0.553 | 0.537 | 0.517 | 0.558 |
| ICU      | Post-ICU | Large  | Apr    | 0.657 | 0.620 | 0.699 | 0.657 | 0.619 | 0.695 |
| ICU      | Post-ICU | Large  | MayJun | 0.730 | 0.604 | 0.827 | 0.728 | 0.633 | 0.818 |

|          |           |        |        |       |       |       |       |       |       |
|----------|-----------|--------|--------|-------|-------|-------|-------|-------|-------|
| ICU      | Post-ICU  | Medium | Feb    | 0.493 | 0.428 | 0.569 | 0.493 | 0.422 | 0.579 |
| ICU      | Post-ICU  | Medium | Mar    | 0.508 | 0.463 | 0.541 | 0.508 | 0.468 | 0.558 |
| ICU      | Post-ICU  | Medium | Apr    | 0.630 | 0.592 | 0.685 | 0.630 | 0.576 | 0.673 |
| ICU      | Post-ICU  | Medium | MayJun | 0.706 | 0.556 | 0.804 | 0.705 | 0.588 | 0.826 |
| ICU      | Post-ICU  | Small  | Feb    | 0.794 | 0.733 | 0.864 | 0.794 | 0.726 | 0.849 |
| ICU      | Post-ICU  | Small  | Mar    | 0.804 | 0.764 | 0.845 | 0.804 | 0.764 | 0.844 |
| ICU      | Post-ICU  | Small  | Apr    | 0.871 | 0.842 | 0.912 | 0.871 | 0.831 | 0.905 |
| ICU      | Post-ICU  | Small  | MayJun | 0.905 | 0.835 | 0.945 | 0.905 | 0.841 | 0.950 |
| ICU      | Death     | Large  | Feb    | 0.478 | 0.413 | 0.540 | 0.478 | 0.413 | 0.549 |
| ICU      | Death     | Large  | Mar    | 0.463 | 0.447 | 0.482 | 0.463 | 0.442 | 0.483 |
| ICU      | Death     | Large  | Apr    | 0.343 | 0.301 | 0.380 | 0.343 | 0.305 | 0.381 |
| ICU      | Death     | Large  | MayJun | 0.270 | 0.173 | 0.396 | 0.272 | 0.182 | 0.367 |
| ICU      | Death     | Medium | Feb    | 0.507 | 0.431 | 0.572 | 0.507 | 0.421 | 0.578 |
| ICU      | Death     | Medium | Mar    | 0.492 | 0.459 | 0.537 | 0.492 | 0.442 | 0.532 |
| ICU      | Death     | Medium | Apr    | 0.370 | 0.315 | 0.408 | 0.370 | 0.327 | 0.424 |
| ICU      | Death     | Medium | MayJun | 0.294 | 0.196 | 0.444 | 0.295 | 0.174 | 0.412 |
| ICU      | Death     | Small  | Feb    | 0.206 | 0.136 | 0.267 | 0.206 | 0.151 | 0.274 |
| ICU      | Death     | Small  | Mar    | 0.196 | 0.155 | 0.236 | 0.196 | 0.156 | 0.236 |
| ICU      | Death     | Small  | Apr    | 0.129 | 0.088 | 0.158 | 0.129 | 0.095 | 0.169 |
| ICU      | Death     | Small  | MayJun | 0.095 | 0.055 | 0.165 | 0.095 | 0.050 | 0.159 |
| Post-ICU | Discharge | Large  | Feb    | 0.685 | 0.597 | 0.750 | 0.687 | 0.581 | 0.766 |
| Post-ICU | Discharge | Large  | Mar    | 0.913 | 0.900 | 0.926 | 0.913 | 0.896 | 0.929 |
| Post-ICU | Discharge | Large  | Apr    | 0.909 | 0.841 | 0.938 | 0.909 | 0.880 | 0.935 |
| Post-ICU | Discharge | Large  | MayJun | 0.854 | 0.732 | 0.939 | 0.851 | 0.718 | 0.938 |
| Post-ICU | Discharge | Medium | Feb    | 0.673 | 0.506 | 0.769 | 0.674 | 0.514 | 0.785 |
| Post-ICU | Discharge | Medium | Mar    | 0.908 | 0.863 | 0.934 | 0.908 | 0.872 | 0.935 |



|          |           |        |        |       |       |       |       |       |       |
|----------|-----------|--------|--------|-------|-------|-------|-------|-------|-------|
| Post-ICU | Discharge | Medium | Apr    | 0.904 | 0.814 | 0.944 | 0.904 | 0.843 | 0.933 |
| Post-ICU | Discharge | Medium | MayJun | 0.847 | 0.638 | 0.924 | 0.843 | 0.702 | 0.933 |
| Post-ICU | Discharge | Small  | Feb    | 0.763 | 0.631 | 0.884 | 0.763 | 0.614 | 0.868 |
| Post-ICU | Discharge | Small  | Mar    | 0.939 | 0.907 | 0.971 | 0.939 | 0.896 | 0.964 |
| Post-ICU | Discharge | Small  | Apr    | 0.937 | 0.884 | 0.967 | 0.936 | 0.877 | 0.966 |
| Post-ICU | Discharge | Small  | MayJun | 0.897 | 0.757 | 0.963 | 0.894 | 0.776 | 0.953 |
| Post-ICU | Death     | Large  | Feb    | 0.315 | 0.250 | 0.403 | 0.313 | 0.234 | 0.419 |
| Post-ICU | Death     | Large  | Mar    | 0.087 | 0.074 | 0.100 | 0.087 | 0.071 | 0.104 |
| Post-ICU | Death     | Large  | Apr    | 0.091 | 0.062 | 0.159 | 0.091 | 0.065 | 0.120 |
| Post-ICU | Death     | Large  | MayJun | 0.146 | 0.061 | 0.268 | 0.149 | 0.062 | 0.282 |
| Post-ICU | Death     | Medium | Feb    | 0.327 | 0.231 | 0.494 | 0.326 | 0.215 | 0.486 |
| Post-ICU | Death     | Medium | Mar    | 0.092 | 0.066 | 0.137 | 0.092 | 0.065 | 0.128 |
| Post-ICU | Death     | Medium | Apr    | 0.096 | 0.056 | 0.186 | 0.096 | 0.067 | 0.157 |
| Post-ICU | Death     | Medium | MayJun | 0.153 | 0.076 | 0.362 | 0.157 | 0.067 | 0.298 |
| Post-ICU | Death     | Small  | Feb    | 0.237 | 0.116 | 0.369 | 0.237 | 0.132 | 0.386 |
| Post-ICU | Death     | Small  | Mar    | 0.061 | 0.029 | 0.093 | 0.061 | 0.036 | 0.104 |
| Post-ICU | Death     | Small  | Apr    | 0.063 | 0.033 | 0.116 | 0.064 | 0.034 | 0.123 |
| Post-ICU | Death     | Small  | MayJun | 0.103 | 0.037 | 0.243 | 0.106 | 0.047 | 0.224 |
| Hospital | Discharge | Large  | Feb    | 0.567 | 0.551 | 0.584 | 0.570 | 0.537 | 0.590 |
| Hospital | Discharge | Large  | Mar    | 0.633 | 0.626 | 0.638 | 0.633 | 0.628 | 0.640 |
| Hospital | Discharge | Large  | Apr    | 0.737 | 0.728 | 0.746 | 0.737 | 0.728 | 0.745 |
| Hospital | Discharge | Large  | May    | 0.829 | 0.802 | 0.847 | 0.830 | 0.809 | 0.852 |
| Hospital | Discharge | Large  | Jun    | 0.903 | 0.874 | 0.930 | 0.905 | 0.872 | 0.923 |
| Hospital | Discharge | Medium | Feb    | 0.563 | 0.542 | 0.586 | 0.565 | 0.537 | 0.588 |
| Hospital | Discharge | Medium | Mar    | 0.625 | 0.606 | 0.638 | 0.625 | 0.612 | 0.638 |
| Hospital | Discharge | Medium | Apr    | 0.726 | 0.709 | 0.741 | 0.727 | 0.711 | 0.742 |

|          |           |        |     |       |       |       |       |       |       |
|----------|-----------|--------|-----|-------|-------|-------|-------|-------|-------|
| Hospital | Discharge | Medium | May | 0.819 | 0.792 | 0.839 | 0.821 | 0.796 | 0.842 |
| Hospital | Discharge | Medium | Jun | 0.900 | 0.871 | 0.929 | 0.902 | 0.869 | 0.922 |
| Hospital | Discharge | Small  | Feb | 0.682 | 0.664 | 0.701 | 0.685 | 0.653 | 0.707 |
| Hospital | Discharge | Small  | Mar | 0.731 | 0.723 | 0.742 | 0.732 | 0.721 | 0.740 |

Table A.24: Estimated probabilities (95% confidence intervals) of next events, given current state, by hospital bed capacity, month of admission and missing outcome assumption: (a) censoring at 1 day after last observed event; (b) ignoring missing outcomes.

Estimated probabilities of final events are given in Table A.25:

| Final Event | Hospital<br>Bed<br>Capacity | Month | CENSORING       |       |       | MISSING         |       |       |
|-------------|-----------------------------|-------|-----------------|-------|-------|-----------------|-------|-------|
|             |                             |       | Pr(Final Event) | Lower | Upper | Pr(Final Event) | Lower | Upper |
| Death       | Large                       | Feb   | 0.372           | 0.346 | 0.394 | 0.370           | 0.347 | 0.389 |
| Death       | Large                       | Mar   | 0.310           | 0.304 | 0.316 | 0.310           | 0.304 | 0.316 |
| Death       | Large                       | Apr   | 0.226           | 0.219 | 0.235 | 0.226           | 0.215 | 0.234 |
| Death       | Large                       | May   | 0.150           | 0.132 | 0.172 | 0.150           | 0.132 | 0.167 |
| Death       | Large                       | Jun   | 0.078           | 0.059 | 0.099 | 0.077           | 0.060 | 0.100 |
| Death       | Medium                      | Feb   | 0.389           | 0.362 | 0.418 | 0.387           | 0.363 | 0.412 |
| Death       | Medium                      | Mar   | 0.329           | 0.317 | 0.342 | 0.329           | 0.322 | 0.343 |
| Death       | Medium                      | Apr   | 0.243           | 0.233 | 0.256 | 0.243           | 0.230 | 0.258 |
| Death       | Medium                      | May   | 0.163           | 0.146 | 0.188 | 0.163           | 0.145 | 0.182 |
| Death       | Medium                      | Jun   | 0.085           | 0.061 | 0.106 | 0.083           | 0.063 | 0.107 |
| Death       | Small                       | Feb   | 0.267           | 0.241 | 0.295 | 0.265           | 0.240 | 0.286 |
| Death       | Small                       | Mar   | 0.226           | 0.218 | 0.236 | 0.226           | 0.218 | 0.233 |
| Death       | Small                       | Apr   | 0.167           | 0.158 | 0.177 | 0.167           | 0.155 | 0.175 |
| Death       | Small                       | May   | 0.110           | 0.097 | 0.126 | 0.109           | 0.097 | 0.125 |
| Death       | Small                       | Jun   | 0.053           | 0.039 | 0.068 | 0.052           | 0.039 | 0.070 |

|           |        |     |       |       |       |       |       |       |
|-----------|--------|-----|-------|-------|-------|-------|-------|-------|
| Discharge | Large  | Feb | 0.628 | 0.606 | 0.654 | 0.630 | 0.611 | 0.653 |
| Discharge | Large  | Mar | 0.690 | 0.684 | 0.696 | 0.690 | 0.684 | 0.696 |
| Discharge | Large  | Apr | 0.774 | 0.765 | 0.781 | 0.774 | 0.766 | 0.785 |
| Discharge | Large  | May | 0.850 | 0.828 | 0.868 | 0.850 | 0.833 | 0.868 |
| Discharge | Large  | Jun | 0.922 | 0.901 | 0.941 | 0.923 | 0.900 | 0.940 |
| Discharge | Medium | Feb | 0.611 | 0.582 | 0.638 | 0.613 | 0.588 | 0.637 |
| Discharge | Medium | Mar | 0.671 | 0.658 | 0.683 | 0.671 | 0.657 | 0.678 |
| Discharge | Medium | Apr | 0.757 | 0.744 | 0.767 | 0.757 | 0.742 | 0.770 |
| Discharge | Medium | May | 0.837 | 0.812 | 0.854 | 0.837 | 0.818 | 0.855 |
| Discharge | Medium | Jun | 0.915 | 0.894 | 0.939 | 0.917 | 0.893 | 0.937 |
| Discharge | Small  | Feb | 0.733 | 0.705 | 0.759 | 0.735 | 0.714 | 0.760 |
| Discharge | Small  | Mar | 0.774 | 0.764 | 0.782 | 0.774 | 0.767 | 0.782 |
| Discharge | Small  | Apr | 0.833 | 0.823 | 0.842 | 0.833 | 0.825 | 0.845 |
| Discharge | Small  | May | 0.890 | 0.874 | 0.903 | 0.891 | 0.875 | 0.903 |
| Discharge | Small  | Jun | 0.947 | 0.932 | 0.961 | 0.948 | 0.930 | 0.961 |

Table A.25: Estimated probabilities (95% confidence intervals) of final events, given current state (hospital-fatality risks and complement), by hospital bed capacity, month of admission and missing outcome assumption: (a) censoring at 1 day after last observed event; (b) ignoring missing outcomes.

Estimated times to next events, under the censoring assumption only, are given in Table A.26:

| From     | Next Event | Hospital Bed Capacity | Month | Mean | 95% CI of Mean |      | Median | 95% CI of Median |      | 25%-ile | 95% CI of 25%-ile |     | 75%-ile | 95% CI of 75%-ile |      |
|----------|------------|-----------------------|-------|------|----------------|------|--------|------------------|------|---------|-------------------|-----|---------|-------------------|------|
|          |            |                       |       |      |                |      |        |                  |      |         |                   |     |         |                   |      |
| Hospital | Discharge  | Large                 | Feb   | 28.3 | 26.1           | 30.6 | 17.9   | 16.6             | 19.1 | 6.4     | 5.9               | 6.8 | 39.2    | 36.5              | 41.7 |
|          | Discharge  | Large                 | Mar   | 15.4 | 15.2           | 15.7 | 9.7    | 9.5              | 9.9  | 3.5     | 3.4               | 3.6 | 21.4    | 21.0              | 21.7 |
|          | Discharge  | Large                 | Apr   | 15.2 | 14.8           | 15.8 | 9.6    | 9.3              | 9.8  | 3.4     | 3.3               | 3.5 | 21.0    | 20.5              | 21.6 |

|           |        |     |      |      |      |      |      |      |     |     |      |      |      |      |
|-----------|--------|-----|------|------|------|------|------|------|-----|-----|------|------|------|------|
| Discharge | Large  | May | 11.0 | 10.5 | 11.7 | 6.9  | 6.5  | 7.2  | 2.5 | 2.3 | 2.6  | 15.1 | 14.3 | 15.8 |
| Discharge | Large  | Jun | 7.7  | 6.8  | 8.6  | 4.8  | 4.5  | 5.3  | 1.7 | 1.6 | 1.9  | 10.6 | 9.9  | 11.7 |
| Discharge | Medium | Feb | 32.5 | 29.5 | 35.0 | 20.5 | 18.9 | 22.2 | 7.4 | 6.8 | 8.0  | 45.0 | 41.5 | 48.7 |
| Discharge | Medium | Mar | 17.7 | 17.0 | 18.4 | 11.2 | 10.8 | 11.6 | 4.0 | 3.9 | 4.2  | 24.5 | 23.8 | 25.5 |
| Discharge | Medium | Apr | 17.4 | 16.7 | 18.0 | 11.0 | 10.6 | 11.5 | 3.9 | 3.8 | 4.1  | 24.1 | 23.3 | 25.1 |
| Discharge | Medium | May | 12.6 | 11.9 | 13.3 | 7.9  | 7.4  | 8.4  | 2.8 | 2.7 | 3.0  | 17.4 | 16.3 | 18.4 |
| Discharge | Medium | Jun | 8.8  | 8.1  | 9.7  | 5.6  | 5.2  | 6.2  | 2.0 | 1.9 | 2.2  | 12.2 | 11.4 | 13.5 |
| Discharge | Small  | Feb | 42.7 | 39.9 | 46.5 | 26.9 | 24.8 | 28.8 | 9.7 | 8.9 | 10.4 | 59.0 | 54.4 | 63.1 |
| Discharge | Small  | Mar | 23.3 | 22.8 | 23.9 | 14.7 | 14.3 | 15.0 | 5.3 | 5.1 | 5.4  | 32.2 | 31.4 | 33.0 |
| Discharge | Small  | Apr | 22.9 | 22.2 | 23.7 | 14.4 | 14.0 | 15.1 | 5.2 | 5.0 | 5.4  | 31.6 | 30.7 | 33.0 |
| Discharge | Small  | May | 16.5 | 15.4 | 17.5 | 10.4 | 9.7  | 11.0 | 3.7 | 3.5 | 4.0  | 22.8 | 21.4 | 24.2 |
| Discharge | Small  | Jun | 11.6 | 10.6 | 12.6 | 7.3  | 6.8  | 8.0  | 2.6 | 2.4 | 2.9  | 16.0 | 14.7 | 17.7 |
| ICU       | Large  | Feb | 5.2  | 4.3  | 5.8  | 3.2  | 2.7  | 3.6  | 1.2 | 1.0 | 1.3  | 7.1  | 6.1  | 8.0  |
| ICU       | Large  | Mar | 5.5  | 5.3  | 5.8  | 3.5  | 3.3  | 3.6  | 1.2 | 1.1 | 1.3  | 7.6  | 7.4  | 7.9  |
| ICU       | Large  | Apr | 5.4  | 5.0  | 5.9  | 3.4  | 3.1  | 3.7  | 1.2 | 1.1 | 1.3  | 7.4  | 6.7  | 8.2  |
| ICU       | Large  | May | 4.0  | 2.9  | 5.7  | 2.5  | 1.8  | 3.2  | 0.9 | 0.6 | 1.2  | 5.6  | 4.1  | 7.0  |
| ICU       | Large  | Jun | 2.4  | 1.1  | 6.3  | 1.5  | 0.7  | 3.5  | 0.5 | 0.3 | 1.3  | 3.3  | 1.7  | 7.8  |
| ICU       | Medium | Feb | 5.6  | 4.6  | 6.7  | 3.5  | 3.0  | 4.2  | 1.3 | 1.1 | 1.5  | 7.8  | 6.7  | 9.3  |
| ICU       | Medium | Mar | 6.0  | 5.5  | 6.6  | 3.8  | 3.4  | 4.2  | 1.3 | 1.2 | 1.5  | 8.3  | 7.6  | 9.2  |
| ICU       | Medium | Apr | 5.8  | 5.1  | 6.9  | 3.7  | 3.3  | 4.3  | 1.3 | 1.1 | 1.5  | 8.1  | 7.2  | 9.3  |
| ICU       | Medium | May | 4.4  | 3.0  | 6.5  | 2.7  | 2.0  | 3.7  | 1.0 | 0.7 | 1.3  | 6.0  | 4.4  | 8.0  |
| ICU       | Medium | Jun | 2.6  | 1.2  | 5.6  | 1.6  | 0.8  | 3.6  | 0.6 | 0.3 | 1.3  | 3.6  | 1.8  | 7.9  |
| ICU       | Small  | Feb | 6.2  | 5.3  | 7.4  | 3.9  | 3.2  | 4.4  | 1.4 | 1.1 | 1.6  | 8.6  | 7.2  | 9.8  |
| ICU       | Small  | Mar | 6.6  | 6.1  | 7.4  | 4.1  | 3.7  | 4.7  | 1.5 | 1.3 | 1.7  | 9.1  | 8.3  | 10.3 |
| ICU       | Small  | Apr | 6.4  | 5.5  | 7.1  | 4.0  | 3.4  | 4.7  | 1.4 | 1.2 | 1.7  | 8.9  | 7.6  | 10.3 |
| ICU       | Small  | May | 4.8  | 3.8  | 6.4  | 3.0  | 2.1  | 3.8  | 1.1 | 0.7 | 1.3  | 6.7  | 4.7  | 8.3  |

|     |          |        |        |      |      |      |      |      |      |     |     |      |      |      |      |
|-----|----------|--------|--------|------|------|------|------|------|------|-----|-----|------|------|------|------|
|     | ICU      | Small  | Jun    | 2.8  | 1.0  | 6.3  | 1.8  | 0.9  | 4.3  | 0.6 | 0.3 | 1.5  | 3.9  | 2.0  | 9.5  |
|     | Death    | Large  | Feb    | 23.2 | 21.5 | 26.0 | 17.1 | 15.4 | 18.5 | 7.8 | 7.0 | 8.5  | 32.1 | 28.9 | 34.7 |
|     | Death    | Large  | Mar    | 8.1  | 7.9  | 8.3  | 6.0  | 5.8  | 6.1  | 2.7 | 2.6 | 2.8  | 11.2 | 10.9 | 11.5 |
|     | Death    | Large  | Apr    | 10.0 | 9.6  | 10.5 | 7.4  | 7.0  | 7.7  | 3.4 | 3.2 | 3.5  | 13.9 | 13.3 | 14.4 |
|     | Death    | Large  | May    | 9.7  | 8.6  | 10.7 | 7.2  | 6.3  | 7.7  | 3.3 | 2.9 | 3.6  | 13.5 | 11.9 | 14.6 |
|     | Death    | Large  | Jun    | 7.2  | 4.8  | 9.7  | 5.3  | 3.9  | 7.0  | 2.4 | 1.8 | 3.2  | 9.9  | 7.3  | 13.2 |
|     | Death    | Medium | Feb    | 24.2 | 22.4 | 26.8 | 17.8 | 15.8 | 19.5 | 8.1 | 7.2 | 8.9  | 33.5 | 29.8 | 36.6 |
|     | Death    | Medium | Mar    | 8.4  | 8.1  | 8.9  | 6.2  | 6.0  | 6.5  | 2.8 | 2.7 | 2.9  | 11.7 | 11.2 | 12.2 |
|     | Death    | Medium | Apr    | 10.5 | 9.8  | 11.2 | 7.7  | 7.3  | 8.2  | 3.5 | 3.3 | 3.7  | 14.5 | 13.7 | 15.4 |
|     | Death    | Medium | May    | 10.2 | 9.1  | 11.4 | 7.5  | 6.6  | 8.1  | 3.4 | 3.0 | 3.7  | 14.0 | 12.6 | 15.3 |
|     | Death    | Medium | Jun    | 7.5  | 5.4  | 10.3 | 5.5  | 4.1  | 7.5  | 2.5 | 1.9 | 3.4  | 10.4 | 7.8  | 14.1 |
|     | Death    | Small  | Feb    | 28.0 | 25.7 | 31.0 | 20.6 | 18.6 | 22.4 | 9.4 | 8.4 | 10.2 | 38.7 | 35.0 | 42.1 |
|     | Death    | Small  | Mar    | 9.8  | 9.1  | 10.2 | 7.2  | 6.8  | 7.5  | 3.3 | 3.1 | 3.4  | 13.5 | 12.9 | 14.0 |
|     | Death    | Small  | Apr    | 12.1 | 11.5 | 12.7 | 8.9  | 8.4  | 9.3  | 4.1 | 3.8 | 4.3  | 16.7 | 15.9 | 17.6 |
|     | Death    | Small  | May    | 11.8 | 10.2 | 13.6 | 8.6  | 7.8  | 9.4  | 3.9 | 3.5 | 4.3  | 16.3 | 14.6 | 17.7 |
|     | Death    | Small  | Jun    | 8.7  | 6.1  | 11.5 | 6.4  | 4.7  | 8.5  | 2.9 | 2.2 | 3.9  | 12.0 | 8.8  | 16.0 |
| ICU | Post-ICU | Large  | Feb    | 14.6 | 12.0 | 16.8 | 11.1 | 9.7  | 12.8 | 5.3 | 4.6 | 6.2  | 20.2 | 17.7 | 23.6 |
|     | Post-ICU | Large  | Mar    | 17.7 | 16.8 | 18.4 | 13.4 | 12.7 | 14.1 | 6.4 | 6.0 | 6.8  | 24.4 | 23.4 | 25.6 |
|     | Post-ICU | Large  | Apr    | 14.8 | 13.9 | 16.4 | 11.2 | 10.2 | 12.2 | 5.3 | 4.8 | 5.9  | 20.3 | 18.4 | 22.1 |
|     | Post-ICU | Large  | MayJun | 10.5 | 7.8  | 14.0 | 7.9  | 5.7  | 10.5 | 3.8 | 2.7 | 5.0  | 14.5 | 10.5 | 19.1 |
|     | Post-ICU | Medium | Feb    | 14.6 | 11.6 | 16.6 | 11.1 | 9.1  | 12.6 | 5.3 | 4.4 | 6.1  | 20.1 | 16.5 | 22.8 |
|     | Post-ICU | Medium | Mar    | 17.7 | 16.5 | 19.9 | 13.4 | 12.2 | 14.8 | 6.4 | 5.7 | 7.0  | 24.4 | 22.3 | 27.1 |
|     | Post-ICU | Medium | Apr    | 14.7 | 13.2 | 16.2 | 11.1 | 9.9  | 12.9 | 5.3 | 4.7 | 6.0  | 20.3 | 17.8 | 23.8 |
|     | Post-ICU | Medium | MayJun | 10.5 | 8.4  | 13.6 | 7.9  | 5.5  | 10.2 | 3.8 | 2.6 | 4.8  | 14.4 | 10.1 | 18.8 |
|     | Post-ICU | Small  | Feb    | 13.3 | 11.2 | 15.6 | 10.1 | 8.8  | 11.7 | 4.8 | 4.2 | 5.6  | 18.3 | 15.9 | 21.4 |
|     | Post-ICU | Small  | Mar    | 16.1 | 14.5 | 18.0 | 12.2 | 11.0 | 13.2 | 5.8 | 5.2 | 6.3  | 22.2 | 20.2 | 24.3 |

|          |           |        |        |      |      |      |      |      |      |      |      |      |      |      |      |
|----------|-----------|--------|--------|------|------|------|------|------|------|------|------|------|------|------|------|
|          | Post-ICU  | Small  | Apr    | 13.4 | 11.9 | 14.9 | 10.1 | 9.2  | 11.4 | 4.8  | 4.3  | 5.5  | 18.5 | 16.6 | 20.9 |
|          | Post-ICU  | Small  | MayJun | 9.5  | 7.2  | 11.8 | 7.2  | 5.0  | 9.2  | 3.4  | 2.4  | 4.4  | 13.1 | 9.2  | 16.9 |
|          | Death     | Large  | Feb    | 13.6 | 11.8 | 16.0 | 10.8 | 9.4  | 12.2 | 5.5  | 4.8  | 6.5  | 18.6 | 16.3 | 20.8 |
|          | Death     | Large  | Mar    | 12.2 | 11.6 | 12.6 | 9.6  | 9.0  | 10.0 | 4.9  | 4.6  | 5.2  | 16.7 | 15.8 | 17.4 |
|          | Death     | Large  | Apr    | 14.3 | 12.9 | 16.0 | 11.3 | 9.8  | 13.2 | 5.8  | 5.1  | 6.8  | 19.6 | 17.0 | 22.7 |
|          | Death     | Large  | MayJun | 4.7  | 3.0  | 6.3  | 3.7  | 2.4  | 5.2  | 1.9  | 1.3  | 2.7  | 6.4  | 4.2  | 9.0  |
|          | Death     | Medium | Feb    | 12.0 | 10.3 | 14.1 | 9.5  | 7.9  | 11.9 | 4.9  | 4.0  | 6.3  | 16.5 | 13.7 | 20.4 |
|          | Death     | Medium | Mar    | 10.8 | 9.7  | 11.7 | 8.5  | 7.7  | 9.5  | 4.4  | 3.9  | 4.9  | 14.7 | 13.6 | 16.6 |
|          | Death     | Medium | Apr    | 12.7 | 11.6 | 14.7 | 10.0 | 8.4  | 11.8 | 5.1  | 4.3  | 6.1  | 17.3 | 14.5 | 20.5 |
|          | Death     | Medium | MayJun | 4.1  | 2.8  | 6.0  | 3.3  | 2.0  | 4.5  | 1.7  | 1.1  | 2.4  | 5.6  | 3.5  | 7.9  |
|          | Death     | Small  | Feb    | 14.2 | 11.3 | 17.8 | 11.2 | 8.7  | 14.2 | 5.8  | 4.4  | 7.3  | 19.4 | 15.1 | 24.8 |
|          | Death     | Small  | Mar    | 12.7 | 10.5 | 15.1 | 10.0 | 7.8  | 12.5 | 5.1  | 4.1  | 6.4  | 17.3 | 13.5 | 21.6 |
|          | Death     | Small  | Apr    | 14.9 | 12.1 | 18.9 | 11.8 | 9.3  | 15.2 | 6.0  | 4.9  | 7.8  | 20.4 | 15.9 | 26.6 |
|          | Death     | Small  | MayJun | 4.8  | 3.1  | 7.6  | 3.8  | 2.5  | 6.1  | 2.0  | 1.3  | 3.1  | 6.6  | 4.4  | 10.5 |
| Post-ICU | Discharge | Large  | Feb    | 22.6 | 19.5 | 26.9 | 19.2 | 16.7 | 22.6 | 11.3 | 9.7  | 13.3 | 30.3 | 26.3 | 35.7 |
|          | Discharge | Large  | Mar    | 21.7 | 21.0 | 22.6 | 18.5 | 17.7 | 19.4 | 10.9 | 10.3 | 11.5 | 29.1 | 27.7 | 30.4 |
|          | Discharge | Large  | Apr    | 18.8 | 17.0 | 20.2 | 16.0 | 15.1 | 17.4 | 9.4  | 8.8  | 10.2 | 25.2 | 23.8 | 27.4 |
|          | Discharge | Large  | MayJun | 12.8 | 10.2 | 15.3 | 11.0 | 8.9  | 13.6 | 6.4  | 5.2  | 8.1  | 17.2 | 14.1 | 21.3 |
|          | Discharge | Medium | Feb    | 26.8 | 24.1 | 30.9 | 22.8 | 19.4 | 27.3 | 13.4 | 11.3 | 16.1 | 35.9 | 30.7 | 42.5 |
|          | Discharge | Medium | Mar    | 25.8 | 23.8 | 27.9 | 22.0 | 19.6 | 23.6 | 12.9 | 11.5 | 14.0 | 34.5 | 30.8 | 36.8 |
|          | Discharge | Medium | Apr    | 22.3 | 19.4 | 25.4 | 19.0 | 17.2 | 21.3 | 11.2 | 10.1 | 12.7 | 29.9 | 27.1 | 33.3 |
|          | Discharge | Medium | MayJun | 15.2 | 11.9 | 19.1 | 13.0 | 10.6 | 17.5 | 7.6  | 6.1  | 10.2 | 20.5 | 16.8 | 27.7 |
|          | Discharge | Small  | Feb    | 27.8 | 23.5 | 32.7 | 23.7 | 19.9 | 28.6 | 13.9 | 11.6 | 16.8 | 37.3 | 31.8 | 44.4 |
|          | Discharge | Small  | Mar    | 26.7 | 24.4 | 28.8 | 22.8 | 21.3 | 24.6 | 13.4 | 12.4 | 14.4 | 35.9 | 33.3 | 38.9 |
|          | Discharge | Small  | Apr    | 23.1 | 21.4 | 26.3 | 19.7 | 17.6 | 21.9 | 11.6 | 10.4 | 12.9 | 31.0 | 27.6 | 34.6 |
|          | Discharge | Small  | MayJun | 15.8 | 11.9 | 22.7 | 13.5 | 11.0 | 16.9 | 7.9  | 6.5  | 9.8  | 21.2 | 17.3 | 26.7 |

|       |        |        |      |      |      |     |     |      |     |     |      |      |      |      |
|-------|--------|--------|------|------|------|-----|-----|------|-----|-----|------|------|------|------|
| Death | Large  | Feb    | 11.4 | 8.7  | 17.0 | 7.7 | 6.0 | 10.0 | 4.4 | 3.4 | 6.0  | 13.6 | 10.9 | 18.4 |
| Death | Large  | Mar    | 13.3 | 11.2 | 17.0 | 8.9 | 7.6 | 10.5 | 5.1 | 4.3 | 6.3  | 15.8 | 13.6 | 19.1 |
| Death | Large  | Apr    | 14.1 | 10.5 | 21.3 | 9.4 | 7.3 | 13.4 | 5.4 | 4.2 | 7.7  | 16.7 | 12.4 | 23.8 |
| Death | Large  | MayJun | 10.8 | 3.8  | 20.8 | 7.2 | 4.0 | 14.3 | 4.2 | 2.2 | 8.4  | 12.8 | 6.9  | 25.1 |
| Death | Medium | Feb    | 11.8 | 7.1  | 17.2 | 7.9 | 5.3 | 11.8 | 4.6 | 3.1 | 6.7  | 14.1 | 9.6  | 20.6 |
| Death | Medium | Mar    | 13.7 | 9.9  | 21.5 | 9.2 | 6.3 | 11.3 | 5.3 | 3.7 | 6.7  | 16.3 | 10.8 | 21.7 |
| Death | Medium | Apr    | 14.6 | 9.1  | 23.4 | 9.8 | 5.7 | 16.5 | 5.6 | 3.4 | 9.6  | 17.3 | 9.6  | 29.8 |
| Death | Medium | MayJun | 11.2 | 6.8  | 23.3 | 7.5 | 3.7 | 14.1 | 4.3 | 2.0 | 7.8  | 13.3 | 6.5  | 26.5 |
| Death | Small  | Feb    | 10.0 | 6.7  | 19.6 | 6.7 | 4.7 | 10.3 | 3.9 | 2.6 | 5.9  | 11.9 | 8.3  | 18.0 |
| Death | Small  | Mar    | 11.6 | 8.4  | 20.5 | 7.7 | 5.3 | 11.3 | 4.5 | 3.0 | 6.5  | 13.8 | 9.6  | 21.0 |
| Death | Small  | Apr    | 12.3 | 8.1  | 18.3 | 8.2 | 5.0 | 12.0 | 4.7 | 2.9 | 7.0  | 14.6 | 9.0  | 21.7 |
| Death | Small  | MayJun | 9.4  | 4.8  | 24.1 | 6.3 | 2.6 | 17.5 | 3.6 | 1.5 | 10.3 | 11.2 | 4.6  | 30.3 |

Table A.26: Summaries of times from current state to next event, conditional on experiencing that next event, by month of admission, assuming missing outcomes are censoring at 1 day after last observed event.

Estimated times to final events (total length of stay in hospital), by pathway through hospital, are given in Table A.27, under the censoring assumption only:

| Outcome | Pathway        | Hospital<br>Bed<br>Capacity | Month | 95% CI of |         |         | 95% CI of |         |         | 95% CI of |         |         |      |      |      |
|---------|----------------|-----------------------------|-------|-----------|---------|---------|-----------|---------|---------|-----------|---------|---------|------|------|------|
|         |                |                             |       | Mean      | 25%-ile | 75%-ile | Mean      | 25%-ile | 75%-ile | Mean      | 25%-ile | 75%-ile |      |      |      |
| Death   | Hospital-Death | Large                       | Feb   | 23.2      | 21.4    | 26.3    | 17.0      | 15.5    | 18.5    | 7.9       | 7.0     | 8.5     | 31.6 | 29.5 | 34.9 |
| Death   | Hospital-Death | Large                       | Mar   | 8.1       | 7.9     | 8.2     | 5.9       | 5.7     | 6.1     | 2.6       | 2.6     | 2.8     | 11.2 | 10.7 | 11.6 |
| Death   | Hospital-Death | Large                       | Apr   | 10.0      | 9.7     | 10.4    | 7.2       | 7.0     | 7.7     | 3.3       | 3.2     | 3.6     | 13.6 | 13.3 | 14.5 |
| Death   | Hospital-Death | Large                       | May   | 9.7       | 9.1     | 10.6    | 7.2       | 6.3     | 8.2     | 3.3       | 2.9     | 3.7     | 13.4 | 11.9 | 15.5 |
| Death   | Hospital-Death | Large                       | Jun   | 7.2       | 5.2     | 9.5     | 5.2       | 3.7     | 7.1     | 2.4       | 1.7     | 3.2     | 9.9  | 7.0  | 13.3 |
| Death   | Hospital-Death | Medium                      | Feb   | 24.2      | 21.6    | 27.8    | 17.9      | 16.4    | 19.4    | 8.2       | 7.5     | 9.0     | 33.4 | 30.9 | 36.7 |

|       |                             |        |     |      |      |      |      |      |      |      |      |      |      |      |      |
|-------|-----------------------------|--------|-----|------|------|------|------|------|------|------|------|------|------|------|------|
| Death | Hospital-Death              | Medium | Mar | 8.4  | 8.0  | 8.8  | 6.2  | 5.8  | 6.5  | 2.9  | 2.6  | 3.0  | 11.7 | 11.0 | 12.3 |
| Death | Hospital-Death              | Medium | Apr | 10.5 | 9.7  | 11.0 | 7.7  | 7.3  | 8.3  | 3.5  | 3.3  | 3.8  | 14.5 | 13.8 | 15.6 |
| Death | Hospital-Death              | Medium | May | 10.2 | 9.1  | 11.3 | 7.6  | 6.6  | 8.6  | 3.5  | 3.0  | 4.0  | 14.2 | 12.3 | 16.2 |
| Death | Hospital-Death              | Medium | Jun | 7.5  | 5.4  | 9.8  | 5.5  | 4.0  | 7.8  | 2.5  | 1.8  | 3.5  | 10.3 | 7.4  | 14.6 |
| Death | Hospital-Death              | Small  | Feb | 28.0 | 25.6 | 31.4 | 20.3 | 19.1 | 21.9 | 9.2  | 8.7  | 10.2 | 38.7 | 35.7 | 41.9 |
| Death | Hospital-Death              | Small  | Mar | 9.8  | 9.3  | 10.2 | 7.3  | 6.8  | 7.5  | 3.3  | 3.1  | 3.5  | 13.6 | 12.8 | 14.2 |
| Death | Hospital-Death              | Small  | Apr | 12.1 | 11.3 | 12.9 | 8.8  | 8.3  | 9.5  | 4.1  | 3.8  | 4.4  | 16.5 | 15.7 | 17.8 |
| Death | Hospital-Death              | Small  | May | 11.8 | 10.8 | 13.1 | 8.6  | 7.5  | 9.9  | 3.9  | 3.4  | 4.5  | 15.9 | 14.2 | 18.5 |
| Death | Hospital-Death              | Small  | Jun | 8.7  | 6.1  | 11.4 | 6.3  | 4.6  | 8.7  | 2.9  | 2.1  | 4.1  | 11.9 | 8.5  | 16.5 |
| Death | Hospital-ICU-Death          | Large  | Feb | 18.8 | 16.9 | 20.5 | 16.0 | 14.3 | 17.7 | 9.7  | 8.5  | 10.6 | 25.1 | 22.4 | 27.9 |
| Death | Hospital-ICU-Death          | Large  | Mar | 17.7 | 17.1 | 18.3 | 15.2 | 14.9 | 15.6 | 9.1  | 8.8  | 9.5  | 23.7 | 23.0 | 24.5 |
| Death | Hospital-ICU-Death          | Large  | Apr | 19.7 | 17.7 | 21.0 | 16.6 | 15.5 | 18.1 | 9.8  | 9.2  | 10.8 | 26.1 | 24.0 | 28.0 |
| Death | Hospital-ICU-Death          | Large  | May | 8.7  | 6.6  | 12.2 | 7.4  | 6.0  | 9.7  | 4.4  | 3.6  | 5.8  | 11.6 | 9.6  | 15.1 |
| Death | Hospital-ICU-Death          | Large  | Jun | 7.0  | 4.9  | 14.3 | 6.0  | 3.8  | 10.3 | 3.6  | 2.3  | 5.9  | 9.3  | 6.0  | 16.8 |
| Death | Hospital-ICU-Death          | Medium | Feb | 17.7 | 15.3 | 19.6 | 15.3 | 13.0 | 17.3 | 9.1  | 7.7  | 10.4 | 23.4 | 20.4 | 26.9 |
| Death | Hospital-ICU-Death          | Medium | Mar | 16.8 | 15.9 | 17.8 | 14.4 | 13.3 | 15.4 | 8.7  | 7.9  | 9.3  | 22.3 | 20.7 | 24.0 |
| Death | Hospital-ICU-Death          | Medium | Apr | 18.5 | 16.9 | 20.1 | 16.0 | 14.5 | 16.9 | 9.5  | 8.6  | 10.3 | 24.6 | 22.4 | 26.4 |
| Death | Hospital-ICU-Death          | Medium | May | 8.5  | 6.3  | 12.0 | 7.1  | 5.6  | 9.3  | 4.2  | 3.2  | 5.5  | 11.4 | 9.2  | 14.7 |
| Death | Hospital-ICU-Death          | Medium | Jun | 6.7  | 4.5  | 15.1 | 5.8  | 3.6  | 10.1 | 3.5  | 2.2  | 5.8  | 9.1  | 5.6  | 16.8 |
| Death | Hospital-ICU-Death          | Small  | Feb | 20.4 | 17.1 | 23.7 | 17.7 | 14.8 | 20.8 | 10.6 | 8.8  | 12.5 | 27.3 | 22.8 | 32.6 |
| Death | Hospital-ICU-Death          | Small  | Mar | 19.3 | 16.7 | 22.2 | 16.3 | 14.5 | 18.6 | 9.9  | 8.7  | 11.2 | 25.3 | 22.6 | 28.6 |
| Death | Hospital-ICU-Death          | Small  | Apr | 21.3 | 18.5 | 25.3 | 18.3 | 15.5 | 20.4 | 10.8 | 9.2  | 12.0 | 28.1 | 24.2 | 32.0 |
| Death | Hospital-ICU-Death          | Small  | May | 9.7  | 7.0  | 14.2 | 8.1  | 6.4  | 10.9 | 4.9  | 3.8  | 6.5  | 12.9 | 10.0 | 17.2 |
| Death | Hospital-ICU-Death          | Small  | Jun | 7.7  | 5.4  | 17.5 | 6.6  | 4.1  | 11.7 | 4.0  | 2.4  | 7.1  | 10.2 | 6.5  | 19.7 |
| Death | Hospital-ICU-Post-ICU-Death | Large  | Feb | 31.2 | 26.4 | 35.3 | 27.3 | 24.9 | 30.8 | 18.3 | 16.4 | 20.8 | 39.4 | 36.8 | 45.1 |
| Death | Hospital-ICU-Post-ICU-Death | Large  | Mar | 36.5 | 34.0 | 39.6 | 31.9 | 30.1 | 33.6 | 21.2 | 19.7 | 22.0 | 46.4 | 43.9 | 49.6 |



|           |                             |        |     |      |      |      |      |      |      |      |      |      |      |      |      |
|-----------|-----------------------------|--------|-----|------|------|------|------|------|------|------|------|------|------|------|------|
| Death     | Hospital-ICU-Post-ICU-Death | Large  | Apr | 34.2 | 29.9 | 40.6 | 29.3 | 24.8 | 35.4 | 19.9 | 16.6 | 24.0 | 43.4 | 35.8 | 53.1 |
| Death     | Hospital-ICU-Post-ICU-Death | Large  | May | 25.3 | 20.0 | 38.4 | 21.7 | 16.2 | 28.4 | 14.7 | 10.7 | 19.4 | 31.6 | 23.7 | 41.1 |
| Death     | Hospital-ICU-Post-ICU-Death | Large  | Jun | 23.6 | 19.1 | 35.3 | 20.0 | 15.4 | 27.4 | 13.4 | 9.9  | 18.1 | 29.7 | 22.7 | 40.2 |
| Death     | Hospital-ICU-Post-ICU-Death | Medium | Feb | 32.1 | 26.6 | 38.4 | 28.1 | 24.0 | 34.3 | 18.7 | 15.9 | 23.1 | 40.6 | 34.7 | 49.6 |
| Death     | Hospital-ICU-Post-ICU-Death | Medium | Mar | 37.4 | 32.8 | 45.7 | 32.3 | 28.9 | 37.6 | 21.6 | 19.2 | 25.4 | 47.2 | 42.2 | 54.4 |
| Death     | Hospital-ICU-Post-ICU-Death | Medium | Apr | 35.1 | 29.9 | 44.8 | 30.6 | 25.5 | 36.3 | 20.3 | 17.2 | 24.4 | 44.2 | 37.1 | 53.2 |
| Death     | Hospital-ICU-Post-ICU-Death | Medium | May | 26.0 | 21.3 | 40.2 | 22.5 | 16.4 | 28.3 | 15.0 | 10.9 | 19.4 | 32.8 | 24.1 | 41.5 |
| Death     | Hospital-ICU-Post-ICU-Death | Medium | Jun | 24.2 | 20.6 | 38.5 | 20.6 | 15.7 | 27.6 | 13.7 | 10.2 | 18.4 | 30.3 | 23.3 | 40.5 |
| Death     | Hospital-ICU-Post-ICU-Death | Small  | Feb | 29.5 | 25.7 | 35.3 | 25.7 | 21.8 | 31.8 | 17.0 | 14.4 | 21.4 | 37.5 | 31.9 | 45.8 |
| Death     | Hospital-ICU-Post-ICU-Death | Small  | Mar | 34.2 | 30.2 | 41.0 | 30.0 | 25.7 | 35.3 | 20.1 | 16.8 | 23.7 | 44.2 | 38.0 | 51.8 |
| Death     | Hospital-ICU-Post-ICU-Death | Small  | Apr | 32.1 | 27.2 | 41.0 | 28.1 | 23.0 | 34.3 | 18.8 | 15.3 | 23.4 | 40.3 | 33.3 | 50.0 |
| Death     | Hospital-ICU-Post-ICU-Death | Small  | May | 23.8 | 19.3 | 36.6 | 20.9 | 16.3 | 30.4 | 14.1 | 10.6 | 20.7 | 30.1 | 23.9 | 44.8 |
| Death     | Hospital-ICU-Post-ICU-Death | Small  | Jun | 21.8 | 17.1 | 34.7 | 18.7 | 13.8 | 29.1 | 12.4 | 8.9  | 19.3 | 27.5 | 20.5 | 43.2 |
| Discharge | Hospital-Discharge          | Large  | Feb | 28.3 | 27.0 | 30.4 | 17.9 | 16.7 | 19.0 | 6.6  | 5.8  | 6.8  | 39.2 | 36.3 | 41.4 |
| Discharge | Hospital-Discharge          | Large  | Mar | 15.4 | 15.2 | 15.6 | 9.6  | 9.4  | 10.0 | 3.4  | 3.3  | 3.7  | 21.2 | 20.8 | 22.0 |
| Discharge | Hospital-Discharge          | Large  | Apr | 15.2 | 14.8 | 15.5 | 9.8  | 9.2  | 9.8  | 3.4  | 3.2  | 3.6  | 21.4 | 20.3 | 21.6 |
| Discharge | Hospital-Discharge          | Large  | May | 11.0 | 10.4 | 11.7 | 6.9  | 6.5  | 7.4  | 2.5  | 2.3  | 2.7  | 15.4 | 14.2 | 16.3 |
| Discharge | Hospital-Discharge          | Large  | Jun | 7.7  | 6.9  | 8.4  | 4.9  | 4.2  | 5.5  | 1.7  | 1.5  | 2.0  | 10.5 | 9.2  | 11.9 |
| Discharge | Hospital-Discharge          | Medium | Feb | 32.5 | 31.0 | 35.1 | 20.0 | 19.2 | 21.7 | 7.3  | 6.9  | 7.9  | 44.6 | 42.1 | 47.4 |
| Discharge | Hospital-Discharge          | Medium | Mar | 17.7 | 17.2 | 18.3 | 11.0 | 10.5 | 11.7 | 3.9  | 3.7  | 4.3  | 24.1 | 23.4 | 25.6 |
| Discharge | Hospital-Discharge          | Medium | Apr | 17.4 | 16.8 | 18.1 | 10.9 | 10.3 | 11.4 | 3.9  | 3.7  | 4.1  | 24.3 | 22.9 | 25.2 |
| Discharge | Hospital-Discharge          | Medium | May | 12.6 | 11.9 | 13.3 | 7.9  | 7.4  | 8.7  | 3.0  | 2.6  | 3.1  | 17.4 | 16.4 | 19.2 |
| Discharge | Hospital-Discharge          | Medium | Jun | 8.8  | 7.9  | 9.6  | 5.6  | 4.8  | 6.3  | 2.0  | 1.7  | 2.2  | 12.1 | 10.4 | 13.7 |
| Discharge | Hospital-Discharge          | Small  | Feb | 42.7 | 40.6 | 46.2 | 26.4 | 25.1 | 28.6 | 9.2  | 9.0  | 10.1 | 58.9 | 55.1 | 62.2 |
| Discharge | Hospital-Discharge          | Small  | Mar | 23.3 | 22.6 | 23.9 | 14.9 | 13.9 | 15.3 | 5.4  | 5.0  | 5.5  | 32.6 | 30.9 | 33.5 |
| Discharge | Hospital-Discharge          | Small  | Apr | 22.9 | 21.8 | 23.7 | 14.3 | 13.4 | 15.1 | 5.2  | 4.9  | 5.5  | 32.1 | 29.7 | 32.8 |

|           |                                 |        |     |      |      |      |      |      |      |      |      |      |      |      |      |
|-----------|---------------------------------|--------|-----|------|------|------|------|------|------|------|------|------|------|------|------|
| Discharge | Hospital-Discharge              | Small  | May | 16.5 | 15.4 | 17.8 | 10.2 | 9.7  | 11.1 | 3.7  | 3.5  | 4.1  | 22.2 | 21.6 | 24.6 |
| Discharge | Hospital-Discharge              | Small  | Jun | 11.6 | 10.4 | 12.8 | 7.3  | 6.4  | 8.1  | 2.6  | 2.3  | 2.9  | 16.0 | 14.1 | 17.7 |
| Discharge | Hospital-ICU-Post-ICU-Discharge | Large  | Feb | 42.4 | 38.6 | 46.1 | 39.0 | 36.0 | 44.5 | 27.2 | 25.1 | 31.1 | 54.2 | 49.7 | 61.1 |
| Discharge | Hospital-ICU-Post-ICU-Discharge | Large  | Mar | 44.9 | 43.4 | 46.0 | 41.3 | 40.1 | 42.5 | 28.8 | 27.6 | 29.7 | 57.5 | 55.5 | 58.8 |
| Discharge | Hospital-ICU-Post-ICU-Discharge | Large  | Apr | 38.9 | 36.8 | 40.8 | 35.6 | 33.7 | 37.6 | 24.6 | 23.3 | 26.2 | 49.1 | 46.6 | 51.9 |
| Discharge | Hospital-ICU-Post-ICU-Discharge | Large  | May | 27.4 | 23.3 | 34.0 | 24.9 | 21.0 | 31.0 | 17.2 | 14.5 | 21.3 | 34.8 | 29.2 | 43.2 |
| Discharge | Hospital-ICU-Post-ICU-Discharge | Large  | Jun | 25.7 | 21.7 | 32.9 | 23.4 | 19.3 | 29.7 | 16.1 | 13.2 | 20.6 | 32.9 | 27.2 | 41.1 |
| Discharge | Hospital-ICU-Post-ICU-Discharge | Medium | Feb | 47.0 | 42.3 | 52.6 | 43.4 | 38.4 | 49.5 | 30.4 | 26.8 | 34.5 | 60.1 | 52.8 | 68.6 |
| Discharge | Hospital-ICU-Post-ICU-Discharge | Medium | Mar | 49.4 | 46.5 | 52.4 | 45.1 | 43.2 | 47.3 | 31.6 | 29.9 | 33.1 | 62.9 | 59.8 | 65.4 |
| Discharge | Hospital-ICU-Post-ICU-Discharge | Medium | Apr | 42.8 | 40.8 | 45.5 | 39.2 | 36.5 | 41.5 | 27.3 | 25.5 | 29.1 | 54.4 | 50.6 | 57.6 |
| Discharge | Hospital-ICU-Post-ICU-Discharge | Medium | May | 30.1 | 25.3 | 37.8 | 27.9 | 23.1 | 33.0 | 19.4 | 16.2 | 23.0 | 38.4 | 32.3 | 45.4 |
| Discharge | Hospital-ICU-Post-ICU-Discharge | Medium | Jun | 28.3 | 23.2 | 36.4 | 25.7 | 21.4 | 31.7 | 17.8 | 14.8 | 22.3 | 36.1 | 29.8 | 43.7 |
| Discharge | Hospital-ICU-Post-ICU-Discharge | Small  | Feb | 47.3 | 41.9 | 52.3 | 43.2 | 39.7 | 50.2 | 30.8 | 27.9 | 35.1 | 60.1 | 55.0 | 69.5 |
| Discharge | Hospital-ICU-Post-ICU-Discharge | Small  | Mar | 49.4 | 46.7 | 53.0 | 45.3 | 43.0 | 49.0 | 31.9 | 30.0 | 34.1 | 62.9 | 59.5 | 67.5 |
| Discharge | Hospital-ICU-Post-ICU-Discharge | Small  | Apr | 43.0 | 39.2 | 46.6 | 39.6 | 36.1 | 42.6 | 28.0 | 25.3 | 30.1 | 54.7 | 50.0 | 58.9 |

|           |                                 |        |     |      |      |      |      |      |      |      |      |      |      |      |      |
|-----------|---------------------------------|--------|-----|------|------|------|------|------|------|------|------|------|------|------|------|
|           | Discharge                       |        |     |      |      |      |      |      |      |      |      |      |      |      |      |
| Discharge | Hospital-ICU-Post-ICU-Discharge | Small  | May | 30.2 | 25.4 | 38.0 | 28.1 | 22.6 | 33.7 | 19.5 | 15.8 | 23.5 | 38.8 | 31.3 | 46.3 |
| Discharge | Hospital-ICU-Post-ICU-Discharge | Small  | Jun | 28.2 | 23.8 | 36.9 | 25.7 | 21.6 | 31.5 | 17.8 | 14.6 | 21.8 | 35.9 | 29.7 | 43.5 |
| Death     | Averaged over pathways          | Large  | Feb | 22.8 | 21.1 | 24.4 | 17.4 | 16.4 | 19.2 | 8.6  | 8.2  | 9.6  | 30.4 | 29.0 | 33.6 |
| Death     | Averaged over pathways          | Large  | Mar | 10.3 | 10.1 | 10.5 | 7.3  | 7.1  | 7.6  | 3.5  | 3.1  | 3.5  | 13.6 | 13.4 | 14.4 |
| Death     | Averaged over pathways          | Large  | Apr | 11.3 | 10.9 | 11.8 | 7.8  | 7.8  | 8.7  | 3.5  | 3.5  | 4.0  | 15.9 | 14.7 | 16.4 |
| Death     | Averaged over pathways          | Large  | May | 10.1 | 9.2  | 11.1 | 7.2  | 6.7  | 8.4  | 3.3  | 3.0  | 3.9  | 13.7 | 12.6 | 15.8 |
| Death     | Averaged over pathways          | Large  | Jun | 7.8  | 6.2  | 10.4 | 5.7  | 4.7  | 7.6  | 2.6  | 2.2  | 3.6  | 10.8 | 8.6  | 14.6 |
| Death     | Averaged over pathways          | Medium | Feb | 23.4 | 21.6 | 25.3 | 17.5 | 16.5 | 19.1 | 8.8  | 8.0  | 9.6  | 32.1 | 29.8 | 34.3 |
| Death     | Averaged over pathways          | Medium | Mar | 10.1 | 9.7  | 10.6 | 7.1  | 6.9  | 7.8  | 3.4  | 3.1  | 3.5  | 13.9 | 13.0 | 14.6 |
| Death     | Averaged over pathways          | Medium | Apr | 11.4 | 11.1 | 12.0 | 8.3  | 7.7  | 8.8  | 3.8  | 3.4  | 4.1  | 15.4 | 14.6 | 16.6 |
| Death     | Averaged over pathways          | Medium | May | 10.4 | 9.5  | 11.5 | 7.6  | 6.7  | 9.0  | 3.5  | 3.1  | 4.2  | 13.3 | 12.7 | 16.6 |
| Death     | Averaged over pathways          | Medium | Jun | 8.0  | 6.3  | 10.7 | 5.4  | 4.8  | 7.7  | 2.6  | 2.2  | 3.4  | 10.8 | 8.8  | 14.7 |
| Death     | Averaged over pathways          | Small  | Feb | 27.6 | 25.5 | 29.6 | 20.5 | 18.6 | 22.6 | 10.0 | 8.8  | 11.1 | 36.4 | 33.6 | 41.5 |
| Death     | Averaged over pathways          | Small  | Mar | 10.5 | 10.1 | 11.1 | 7.6  | 7.0  | 8.1  | 3.5  | 3.2  | 3.8  | 14.3 | 13.6 | 15.3 |
| Death     | Averaged over pathways          | Small  | Apr | 12.5 | 11.8 | 13.4 | 8.8  | 8.4  | 9.7  | 4.1  | 3.7  | 4.6  | 17.2 | 15.7 | 18.1 |
| Death     | Averaged over pathways          | Small  | May | 11.9 | 10.8 | 13.5 | 8.4  | 7.8  | 10.1 | 3.8  | 3.5  | 4.8  | 16.3 | 14.5 | 19.0 |
| Death     | Averaged over pathways          | Small  | Jun | 8.9  | 6.9  | 12.3 | 7.4  | 5.1  | 8.6  | 3.2  | 2.3  | 4.0  | 14.0 | 9.5  | 16.3 |
| Discharge | Averaged over pathways          | Large  | Feb | 29.7 | 27.3 | 31.2 | 20.8 | 19.1 | 21.7 | 7.4  | 6.8  | 7.9  | 42.6 | 39.6 | 44.2 |
| Discharge | Averaged over pathways          | Large  | Mar | 17.9 | 17.6 | 18.2 | 11.3 | 10.7 | 11.8 | 3.9  | 3.8  | 4.1  | 25.7 | 24.4 | 26.4 |
| Discharge | Averaged over pathways          | Large  | Apr | 16.3 | 15.9 | 16.6 | 10.8 | 10.0 | 10.7 | 3.7  | 3.5  | 3.8  | 23.7 | 22.1 | 23.7 |
| Discharge | Averaged over pathways          | Large  | May | 11.4 | 10.6 | 11.9 | 7.3  | 6.8  | 7.6  | 2.5  | 2.4  | 2.8  | 16.1 | 15.1 | 16.7 |
| Discharge | Averaged over pathways          | Large  | Jun | 8.0  | 7.6  | 8.8  | 5.0  | 4.6  | 5.5  | 1.8  | 1.6  | 2.0  | 11.1 | 10.2 | 12.2 |
| Discharge | Averaged over pathways          | Medium | Feb | 33.7 | 31.1 | 36.0 | 22.7 | 21.2 | 24.8 | 8.0  | 7.6  | 9.3  | 46.6 | 44.3 | 50.5 |

|           |                        |        |     |      |      |      |      |      |      |      |     |      |      |      |      |
|-----------|------------------------|--------|-----|------|------|------|------|------|------|------|-----|------|------|------|------|
| Discharge | Averaged over pathways | Medium | Mar | 19.9 | 19.3 | 20.7 | 12.8 | 12.2 | 13.4 | 4.5  | 4.1 | 4.8  | 28.4 | 27.0 | 29.5 |
| Discharge | Averaged over pathways | Medium | Apr | 18.4 | 17.9 | 19.1 | 11.6 | 11.0 | 12.3 | 4.1  | 4.0 | 4.4  | 25.6 | 24.8 | 27.3 |
| Discharge | Averaged over pathways | Medium | May | 12.9 | 12.1 | 13.6 | 8.3  | 7.6  | 8.8  | 2.9  | 2.7 | 3.2  | 18.2 | 17.0 | 19.4 |
| Discharge | Averaged over pathways | Medium | Jun | 9.1  | 8.6  | 10.1 | 5.7  | 5.1  | 6.2  | 2.0  | 1.8 | 2.3  | 12.7 | 11.5 | 14.1 |
| Discharge | Averaged over pathways | Small  | Feb | 43.0 | 40.2 | 45.4 | 28.7 | 26.6 | 31.1 | 10.6 | 9.8 | 11.7 | 60.0 | 56.0 | 63.0 |
| Discharge | Averaged over pathways | Small  | Mar | 24.7 | 24.0 | 25.5 | 16.1 | 15.3 | 16.8 | 5.8  | 5.4 | 5.9  | 34.8 | 33.7 | 36.3 |
| Discharge | Averaged over pathways | Small  | Apr | 23.4 | 22.9 | 24.3 | 15.7 | 14.4 | 15.8 | 5.6  | 5.1 | 5.7  | 34.0 | 31.4 | 34.4 |
| Discharge | Averaged over pathways | Small  | May | 16.7 | 15.4 | 17.7 | 10.4 | 9.9  | 11.6 | 3.8  | 3.5 | 4.1  | 23.1 | 21.6 | 25.0 |
| Discharge | Averaged over pathways | Small  | Jun | 11.8 | 11.0 | 13.0 | 7.3  | 6.8  | 8.3  | 2.5  | 2.4 | 3.0  | 16.1 | 14.8 | 18.3 |

Table A.27: Summaries of times from hospital admission to final events (total length of stay), by pathway through hospital, hospital bed capacity and month of admission, conditional on experiencing that final event and assuming missing outcomes are censoring at 1 day after last observed event.

Estimated total lengths of stay in hospital by month of admission, averaged over pathways and final outcomes, are given in Table A.28, under the censoring assumption only:

| Hospital Bed Capacity | Month | Mean | 95% CI of Mean |      | Median | 95% CI of Median |      | 25%-ile | 95% CI of 25%-ile |     | 75%-ile | 95% CI of 75%-ile |      |
|-----------------------|-------|------|----------------|------|--------|------------------|------|---------|-------------------|-----|---------|-------------------|------|
|                       |       |      |                |      |        |                  |      |         |                   |     |         |                   |      |
| Large                 | Feb   | 27.1 | 25.6           | 28.3 | 18.9   | 18.1             | 20.1 | 7.8     | 7.5               | 8.4 | 37.4    | 35.3              | 39.0 |
| Large                 | Mar   | 15.5 | 15.3           | 15.7 | 9.7    | 9.3              | 9.8  | 3.8     | 3.5               | 3.9 | 21.8    | 20.3              | 21.5 |
| Large                 | Apr   | 15.2 | 14.9           | 15.6 | 9.7    | 9.4              | 10.1 | 3.7     | 3.5               | 3.8 | 20.9    | 20.3              | 21.6 |
| Large                 | May   | 11.2 | 10.7           | 11.5 | 7.3    | 6.7              | 7.7  | 2.8     | 2.5               | 2.9 | 15.4    | 14.4              | 16.5 |
| Large                 | Jun   | 8.0  | 7.5            | 8.9  | 5.0    | 4.5              | 5.5  | 1.9     | 1.6               | 2.0 | 10.8    | 9.9               | 12.1 |
| Medium                | Feb   | 29.7 | 27.5           | 31.4 | 20.2   | 18.9             | 21.3 | 8.8     | 7.9               | 9.1 | 40.9    | 37.8              | 42.5 |
| Medium                | Mar   | 16.7 | 16.2           | 17.1 | 10.2   | 9.7              | 10.6 | 3.9     | 3.8               | 4.2 | 22.4    | 21.5              | 23.4 |
| Medium                | Apr   | 16.7 | 16.3           | 17.3 | 10.6   | 10.1             | 11.3 | 4.1     | 3.9               | 4.3 | 22.6    | 21.9              | 23.9 |

|        |     |      |      |      |      |      |      |      |     |      |      |      |      |
|--------|-----|------|------|------|------|------|------|------|-----|------|------|------|------|
| Medium | May | 12.5 | 11.9 | 13.2 | 8.0  | 7.7  | 8.8  | 3.1  | 2.9 | 3.3  | 17.2 | 16.3 | 18.5 |
| Medium | Jun | 9.0  | 8.3  | 10.1 | 5.8  | 5.1  | 6.2  | 2.2  | 1.9 | 2.3  | 12.5 | 11.2 | 13.5 |
| Small  | Feb | 38.9 | 36.8 | 41.3 | 26.1 | 24.3 | 27.3 | 10.6 | 9.7 | 11.2 | 53.2 | 49.1 | 55.2 |
| Small  | Mar | 21.5 | 21.0 | 21.9 | 13.1 | 12.6 | 13.5 | 5.1  | 4.7 | 5.1  | 28.9 | 28.2 | 30.5 |
| Small  | Apr | 21.6 | 21.1 | 22.3 | 13.3 | 13.1 | 14.1 | 5.0  | 4.8 | 5.3  | 29.6 | 28.7 | 30.6 |
| Small  | May | 16.2 | 15.3 | 16.8 | 10.5 | 9.7  | 11.0 | 3.8  | 3.5 | 4.1  | 22.3 | 20.9 | 23.8 |
| Small  | Jun | 11.6 | 10.7 | 13.1 | 7.5  | 6.6  | 8.1  | 2.7  | 2.3 | 2.9  | 16.5 | 14.3 | 17.5 |

*Table A.28: Summaries of lengths of stay in hospital (total time in hospital), by hospital bed capacity and month of admission, averaged over pathways and final outcomes, assuming missing outcomes are censoring at 1 day after last observed event.*

#### **A.4 Definitions**

***Ageing index:*** the ratio of the number of elderly people (65+) compared to the number of young people (0-14 years old).

***Old age dependency index:*** the ratio of the number of elderly people (65+), compared to the number of people of working age (15-64 years old).

***Hospital-fatality risk:*** a measure of the severity of infection, is defined as the probability of death among cases who required hospitalization for medical reasons .

## References

1. Regione Lombardia “Open Data”; Demografia; ex 6 <https://www.dati.lombardia.it/stories/s/jx4t-xhet>; Accessed 20 December 2020
2. Regione Lombardia “Open Data”; Mortalità; <https://www.dati.lombardia.it/stories/s/av99-przx>; Accessed 20 December 2020
3. Italian Ministry of Health, Ministerial Circular N°1997, 22 January 2020+
4. Welfare Directorate of Regione Lombardia, Protocol G1.2020.0002677, 23 January 2019
5. Welfare Directorate of Regione Lombardia, Regional Decree N° XI/2906; 8 March 2020
